# Supplementary material for: The experience of living with patellofemoral pain—loss, confusion and fear-avoidance: a UK qualitative study
Source: PubMed Central journal article supplement (PMC5786111; doi:10.1136/bmjopen-2017-018624), 2018-01-23
Supplement: bmjopen-2017-018624.draft_revisions.pdf [file bmjopen-2017-018624.draft_revisions.pdf]

# BMJ Open

BMJ Open is committed to open peer review. As part of this commitment we make the peer review history of every article we publish publicly available.

When an article is published we post the peer reviewers' comments and the authors' responses online. We also post the versions of the paper that were used during peer review. These are the versions that the peer review comments apply to.

The versions of the paper that follow are the versions that were submitted during the peer review process. They are not the versions of record or the final published versions. They should not be cited or distributed as the published version of this manuscript.

BMJ Open is an open access journal and the full, final, typeset and author-corrected version of record of the manuscript is available on our site with no access controls, subscription charges or pay-per-view fees (<http://bmjopen.bmj.com>).

If you have any questions on BMJ Open's open peer review process please email [editorial.bmjopen@bmj.com](mailto:editorial.bmjopen@bmj.com)

# BMJ Open

## The lived experience of patellofemoral pain: loss, confusion and fear-avoidance

|                                 |                                                                                                                                                                                                                                                                                                                                                                                                                                                                                                                                                                                                                                                                                                                                                                                                                                                                                                                                                                                                                                                                               |
|---------------------------------|-------------------------------------------------------------------------------------------------------------------------------------------------------------------------------------------------------------------------------------------------------------------------------------------------------------------------------------------------------------------------------------------------------------------------------------------------------------------------------------------------------------------------------------------------------------------------------------------------------------------------------------------------------------------------------------------------------------------------------------------------------------------------------------------------------------------------------------------------------------------------------------------------------------------------------------------------------------------------------------------------------------------------------------------------------------------------------|
| Journal:                        | <i>BMJ Open</i>                                                                                                                                                                                                                                                                                                                                                                                                                                                                                                                                                                                                                                                                                                                                                                                                                                                                                                                                                                                                                                                               |
| Manuscript ID                   | bmjopen-2017-018624                                                                                                                                                                                                                                                                                                                                                                                                                                                                                                                                                                                                                                                                                                                                                                                                                                                                                                                                                                                                                                                           |
| Article Type:                   | Research                                                                                                                                                                                                                                                                                                                                                                                                                                                                                                                                                                                                                                                                                                                                                                                                                                                                                                                                                                                                                                                                      |
| Date Submitted by the Author:   | 11-Jul-2017                                                                                                                                                                                                                                                                                                                                                                                                                                                                                                                                                                                                                                                                                                                                                                                                                                                                                                                                                                                                                                                                   |
| Complete List of Authors:       | Smith, Benjamin; Derby Teaching Hospitals NHS Foundation Trust, Physiotherapy Outpatients; University of Nottingham, Division of Rehabilitation and Ageing, School of Medicine<br>Moffatt, Fiona; University of Nottingham, Division of Physiotherapy and Rehabilitation Sciences, School of Health Sciences,<br>Hendrick, Paul ; University of Nottingham, Division of Physiotherapy and Rehabilitation Sciences, School of Health Sciences<br>Bateman, Marcus; Derby Teaching Hospitals NHS Foundation Trust, Physiotherapy Outpatients<br>Rathleff, Michael ; Aalborg University, Research Unit for General Practice in Aalborg, Department of Clinical Medicine ; Aalborg University Hospital, Department of Occupational Therapy and Physiotherapy, Department of Clinical Medicine<br>Selfe, James; Manchester Metropolitan University, Department of Health Professions<br>Smith, Toby O.; University of East Anglia, Faculty of Medicine and Health Sciences<br>Logan, Phillipa; University of Nottingham , Division of Rehabilitation and Ageing, School of Medicine |
| <b>Primary Subject Heading</b>: | Qualitative research                                                                                                                                                                                                                                                                                                                                                                                                                                                                                                                                                                                                                                                                                                                                                                                                                                                                                                                                                                                                                                                          |
| Secondary Subject Heading:      | Rehabilitation medicine, Sports and exercise medicine                                                                                                                                                                                                                                                                                                                                                                                                                                                                                                                                                                                                                                                                                                                                                                                                                                                                                                                                                                                                                         |
| Keywords:                       | patellofemoral pain, anterior knee pain, PFP                                                                                                                                                                                                                                                                                                                                                                                                                                                                                                                                                                                                                                                                                                                                                                                                                                                                                                                                                                                                                                  |
|                                 |                                                                                                                                                                                                                                                                                                                                                                                                                                                                                                                                                                                                                                                                                                                                                                                                                                                                                                                                                                                                                                                                               |

SCHOLARONE™  
Manuscripts

## The lived experience of patellofemoral pain: loss, confusion and fear-avoidance

Benjamin E Smith<sup>1,2,\*</sup>, Fiona Moffatt<sup>3</sup>, Paul Hendrick<sup>3</sup>, Marcus Bateman<sup>1</sup>, Michael Skovdal Rathleff<sup>4,5</sup>, James Selfe<sup>6</sup>, Toby O Smith<sup>7</sup>, Pip Logan<sup>2</sup>

<sup>1</sup>Derby Teaching Hospitals NHS Foundation Trust, Physiotherapy Department (Level 3), London Road Community Hospital, Derby DE1 2QY, UK

<sup>2</sup>Division of Rehabilitation and Ageing, School of Medicine, University of Nottingham, Nottingham, UK

<sup>3</sup>Division of Physiotherapy and Rehabilitation Sciences, School of Health Sciences, University of Nottingham, Nottingham University Hospitals (City Campus), Nottingham, UK.

<sup>4</sup>Research Unit for General Practice in Aalborg, Department of Clinical Medicine at Aalborg University, Aalborg, Denmark

<sup>5</sup>Department of Occupational Therapy and Physiotherapy, Department of Clinical Medicine, Aalborg University Hospital, Denmark

<sup>6</sup>Department of Health Professions, Manchester Metropolitan University, Manchester, UK

<sup>7</sup>Faculty of Medicine and Health Sciences, University of East Anglia, Norwich, UK

\*Corresponding author. Tel: 01332 254631 Email: [benjamin.smith3@nhs.net](mailto:benjamin.smith3@nhs.net)

**Word Count:** 5,500

## Abstract

### Objectives:

To investigate, through phenomenological inquiry, the lived experience and perceptions of people with patellofemoral pain, prior to starting physiotherapy.

### Design:

Qualitative study design using semi-structured interviews.

### Setting:

A National Health Service (NHS) physiotherapy clinic within a large UK teaching hospital.

### Participants:

A convenience sample of ten participants, aged between 18 and 40, with a diagnosis of patellofemoral pain and on a physiotherapy waiting list.

### Results:

Participants offered rich and detailed accounts of the impact and lived experience of patellofemoral pain, including: loss of physical and functional ability; loss of self-identity; pain related confusion and difficulty making sense of their pain; pain related fear, including fear-avoidance and 'damage' beliefs; inappropriate coping strategies and fear of the future. The five major themes that emerged from the data were: (1) impact on self; (2) uncertainty, confusion and sense making; (3) exercise and activity beliefs; (4) behavioural coping strategies and (5) expectations of the future.

### Conclusions:

These findings offer an insight into the lived experience of individuals with patellofemoral pain. Previous literature has focused on pain and biomechanics, rather than the individual experience, attached meanings and any wider context within a sociocultural perspective. Our findings suggest future research is warranted into biopsychosocial targeted interventions aimed at the beliefs and pain related fear for people with patellofemoral pain. The current consensus that best-evidence treatments consisting of hip and knee strengthening may not be adequate to address the fears and beliefs identified in the current study. Further qualitative research may be warranted on the impact and interpretation of medical terminology commonly used with this patient group, for example, 'weakness' and 'patellar mal-tracking' and its impact and interpretation by patients.

### Trial registration:

ISRCTN 35272486

## Article Summary

### Strengths and limitations of this study:

- This is the first study to use a qualitative method of inquiry to gain phenomenological data on the lived experience of people with patellofemoral pain.
- Two authors independently coded all transcripts, and a clear, transparent and reproducible methodological approach was used in the thematic analysis.

1  
2  
3  
4  
5  
6  
7  
8  
9  
10  
11  
12  
13  
14  
15  
16  
17  
18  
19  
20  
21  
22  
23  
24  
25  
26  
27  
28  
29  
30  
31  
32  
33  
34  
35  
36  
37  
38  
39  
40  
41  
42  
43  
44  
45  
46  
47  
48  
49  
50  
51  
52  
53  
54  
55  
56  
57  
58  
59  
60

- For pragmatic reasons a convenience sampling technique was used. However, the study had a good representation of male and females, included a variety of ethnic groups, and had similar baseline demographics as larger NHS based studies.

For peer review only

## Introduction

Patellofemoral pain (PFP) is one of the most common and costly forms of knee pain.<sup>[1–3]</sup> It has an estimated prevalence of 23% in the general population in the UK.<sup>[1]</sup> Symptoms typically include retro-patellar or diffuse peripatellar pain, aggravated by activities that load the joint, such as climbing and descending stairs, squatting and running.<sup>[4]</sup>

Historically PFP has been labelled a “benign, self-limiting condition”, that improves over time with little intervention indicated.<sup>[5]</sup> However, this belief has recently been challenged with data suggesting that the overall long-term prognosis for the majority of patients with PFP is poor.<sup>[6]</sup> Only one third of patients are pain-free one year after diagnosis,<sup>[6]</sup> and 91% still report pain and dysfunction four years post-diagnosis.<sup>[7]</sup> Quantitative data suggests that some patients withdraw from participation in physical activities,<sup>[8,9]</sup> and may develop associated psychological distress, such as fear-avoidance and catastrophising thoughts in relation to their knee pain.<sup>[10–12]</sup>

The biopsychosocial model of persistent pain has recognised that psychological factors, such as fear and catastrophising can, through changes to behaviour, modulate physiological responses to pain with the development and maintenance of persistent pain.<sup>[13–17]</sup> Psychological distress has been identified in low back pain and tendon pain populations through systematic reviews,<sup>[18,19]</sup> and qualitative methods in low back and shoulder populations,<sup>[20–22]</sup> however to our knowledge this has not been investigated in PFP. Advocates of qualitative research methods suggest that qualitative inquiry can disclose the lived experience of people with pain; and therefore be used to understand patient motivation, social engagement and provide a wealth of information about the sociocultural context to pain,<sup>[23,24]</sup> contemporary models of persistent pain have identified the importance of thinking beyond muscles and joints,<sup>[25]</sup> and qualitative inquiry can provide an insight that may lead to development of ideas and hypothesis generation within the context of the biopsychosocial model of pain. No study using qualitative methods has been published regarding PFP. Therefore the aim of this study was to give a more detailed account of the lived experience of people with PFP seeking secondary care within the UK.

## Method

In order to address gaps in the literature this research focused on identifying themes within the participants' lived experience of PFP. Thematic analysis is the most appropriate method for this type of inquiry, as codes and themes can be created inductively to capture meaning and content without prior preconceptions allowing flexibility to generate a rich and detailed account of the data.<sup>[26]</sup>

In this study, data were analysed thematically using the guidelines set out by Braun and Clarke,<sup>[26]</sup> and was reported in line with the COnsolidated criteria for REporting Qualitative research (COREQ) checklist (see supplementary file 1).<sup>[27]</sup>

The authors took an epistemological position that recognises the experience at an individual level, and any meanings attached, whilst considering the wider context within a sociocultural perspective. Sitting central on the spectrum of realism and constructivism, this position is described as "contextualist" by Braun and Clarke.<sup>[26]</sup>

## Participants

A convenience sample of ten participants with a diagnosis of PFP were recruited from an NHS physiotherapy waiting list. Based on similar studies of other musculoskeletal conditions, we anticipate this sample size would be sufficient to reach data saturation.<sup>[22,28]</sup> Participants were initially contacted by mail and followed up by a telephone call. Thirty four information sheets were sent out, and 24 potential participants were contacted by telephone; two could not make the interview before physiotherapist was due to start; five physiotherapy had already commenced; one reported resolution of symptoms; and six declined to participate. Inclusion criteria were participants aged 18 to 40 with signs and symptoms of PFP, defined as: anterior or retro-patellar pain reported on at least two of the following activities; prolonged sitting, ascending or descending stairs, squatting, jumping and running.<sup>[4]</sup> These were pre-screened during an initial telephone conversation. Exclusion criteria included: previous knee surgery; awaiting lower limb surgery; knee ligamentous instability; history of patellar dislocation; true knee locking or giving way; reasons to suspect systemic pathology, or acute illness; pregnancy or breast feeding; patellar or iliotibial tract tendinopathy; and those not able to speak or understand English.

## Recruitment

Participants were offered interviews at their home, or in a hospital-based physiotherapy department; all opted to be interviewed at the hospital. On arrival the researcher (BES) introduced himself as a physiotherapist working in that department, and also a researcher conducting a PhD. The researcher explained the aims of the study. Written consent and verbal consent was taken to start recording.

## Data Collection

With reference to previous literature on low back pain, shoulder pain and tendon pain,<sup>[20-22]</sup> semi-structured interviews were designed by the researchers using a topic guideline with prompts to explore participants' experience of: living with PFP; past healthcare management; their interpretation of causation of their pain; beliefs, attitudes and behaviour in relation to their pain and expectations for the future.

1  
2  
3 The researcher also maintained a reflective journal, noting down initial thoughts and ideas after  
4 each interview.<sup>[22]</sup> This identified that early interviews raised issues about other (past and present)  
5 musculoskeletal pain, and specific coping strategies employed by participants for their PFP. These  
6 were therefore incorporated into subsequent interview schedules.  
7

## 8 **Data Analysis**

9  
10 All audio files were collected and transcribed verbatim. During transcription, initial thoughts and  
11 ideas were noted in the reflective journal. Audio files were listened to several times to check for  
12 accuracy, and transcriptions were read and re-read a number of times; this initial process of data  
13 familiarisation allowed for 'data immersion' by the researchers, and generation of preliminary  
14 ideas.<sup>[26]</sup> Data coding then identified and coded pertinent features of the data giving equal priority  
15 over the whole dataset. These steps were independently conducted by two researchers (BES & FM)  
16 who met to compare codes and develop agreement on the grouping of codes into themes. The  
17 generated themes were reviewed and refined, ensuring that they explained the data in relation to  
18 the coded data, and the whole dataset. The researchers then consulted on the final two stages;  
19 themes and sub-themes were named and defined to demonstrate a clear narrative, using compelling  
20 extracts as illustrations. Consideration was given to each theme individually, but also to how they  
21 related to the dataset as a whole and other themes.<sup>[26]</sup>  
22  
23  
24

25 Data were organised and analysed using QSR International's NVivo 11. After ten interviews, it was  
26 determined by the researchers that data saturation had occurred as no new thoughts or concepts  
27 were generated in the later interviews.  
28  
29  
30  
31  
32  
33  
34  
35  
36  
37  
38  
39  
40  
41  
42  
43  
44  
45  
46  
47  
48  
49  
50  
51  
52  
53  
54  
55  
56  
57  
58  
59  
60



## Results

Participants ranged from 26 to 37 years of age (mean age 30.6), with a diagnosis of PFP for a mean duration of 77 months (range: 3 months to 15 years). Seven participants were female, three were male. The interviews ranged from 13 to 43 minutes (mean time: 27 minutes).

Five themes emerged from the analysis: (1) impact on self; (2) uncertainty, confusion and sense making; (3) exercise and activity beliefs; (4) behavioural coping strategies and (5) expectations of the future. Data are presented to demonstrate the range and meaning to each theme.

### Theme 1: impact on self

Participants offered rich and detailed accounts of the impact and lived experience of PFP. Loss emerged as a continuous sub-theme, and descriptions of the negative effect on their lives were broad and far-reaching. Symptoms affected their daily life, with pain being a pervasive and disruptive feature of their day, with resulting loss of physical ability:

---

*"I struggle at work, bending down to get bottom shelf and getting back up, I literally have to hold onto the table to pull myself up. I can't do it off just my knees." [P7].*

---

*"Yeah, well, it's a pain really because I'm walking around. I'm very stiff with that leg. Going up the stairs, down the stairs at work, getting out of a chair, getting into the car." [P6].*

In addition to loss of physical ability, loss of self and loss of self-identity was evident in the stories told by many of the participants in this study. Self and self-identity are different concepts about ways in which individuals evaluate and interpret themselves; they are nested elements that are shaped by the contexts of individual's lives, with direct influence on decisions and behaviours.<sup>[29]</sup> Self, in its broader sense, can be defined as one's individuality and process of making sense of the world around them; it is a cognitive structure that defines one's sense of worth.<sup>[30]</sup> Self-identity, however, is the cognitive structure of internalised meanings and expectations associated with one's position and role within a social network.<sup>[31]</sup>

Several participants described the negative impact of PFP on their mental well-being, with subsequent loss of self-identity:

*"I would say the reason I got my horse was because I have mental health problems and so having a horse is my routine, structure, thing that I look forward to doing. The positive in my life. And having the knee problem makes that, makes that, not so effective. You can't do, what I imagined I would be able to do." [P4].*

Physical activity has been identified as a key quality of life domain, and the one most affected among patients with persistent pain.<sup>[32]</sup> Loss of activities for these participants included: walking; exercise; driving; holidays; time with family and friends; playing with children; duties at work and kneeling. These loss of activities directly affected participants' role and position within their social network, triggering feelings of loss of self-identity. For example, a number of participants explained how PFP affected their work, and made them question their career aspirations:

1  
2  
3 *"I would say, it makes me like wonder, if I can do the job, not at this point but maybe when I*  
4 *get older and older, maybe I won't be able to do it". [P4].*  
5

6 Judgemental attitudes from colleagues, friends or family, were described by a number of  
7 participants, with subsequent feelings of loss of self-identity, acting as moderators to low moods and  
8 feelings of premature ageing:  
9

10 *"They're saying that I'm a grandma. They say, 'Yeah. If you were a horse, they'd put you*  
11 *down (laughter). Just joking me, but obviously, it has affected me in the way that I've had to*  
12 *go out of work to go over to get physio. And I have had this time off, so I don't know if they're*  
13 *a bit, 'Well, it's not that bad.' Because day-to-day I try to be as normal as I can." [P9].*  
14  
15

16 Loss of significant relationships has emerged as a key aspect of loss in previous studies of patients  
17 with persistent pain,<sup>[33-35]</sup> and disruption to important and meaningful relationships was a strong  
18 and common theme found in patients with PFP. For example:  
19

20 *"I've missed out of things over the years, spending time with friends, spending time with*  
21 *family and that kind of thing, because I've not been able to do it." [P6].*  
22  
23

24 As identified by the above extracts, PFP had a compelling and far reaching impact on the participants  
25 and their lives. The pain and its disruption to life; loss of self-identity; and loss of relationships were  
26 sub-themes that emerged from the data. These embedded sub-themes were inter-related to each  
27 other, with loss emerging as a continuous thread throughout.  
28  
29

## 30 **Theme 2: uncertainty, confusion and sense making**

31  
32 Confusion and sense making formed a central part in the lives of the participants, with a strong  
33 desire from all to elucidate the cause of their pain.  
34

35 *"If I could find out what it was that was causing the pain, then you hope it would be gone*  
36 *within a year. But because we don't really know what's caused it, it's kinda trial and error. So*  
37 *I don't really know." [P1].*  
38  
39

40 The predominant focus of the participants' beliefs and attempts at making sense of their pain was  
41 that biomechanical factors were causative, with individuals trying to link these factors to the  
42 development and maintenance of their pain.  
43

44 *"My running technique or, I'm not sure. I'm not sure about that. I'm not sure. I think that's*  
45 *one thing, maybe something to do with the running technique, or something, or something*  
46 *to do with that." [P8].*  
47  
48

49 Furthermore, confusion was also related to the episodic nature of the symptoms, with participants  
50 attempting to relate 'flare-ups' to the same biomedical factors.  
51

52 A number of participants told stories of structural and biomedical beliefs becoming deep-rooted and  
53 established when reinforced. For example, one participant recounted multiple encounters with  
54 healthcare practitioners that influenced and reinforced her structural belief.  
55  
56  
57  
58  
59  
60

1  
2  
3 *"The work physio guy said to me that he thinks that my heels have maybe gone in which has*  
4 *then pulled my kneecap out of alignment. So instead of going smoothly over the joint where*  
5 *it's supposed to, that it's probably moving over the bone and that's the sharp pain that I'm*  
6 *feeling. Which did make sense because it, like I said, felt like I'd got a rock underneath my*  
7 *kneecap at some stage."* [P9].  
8

9  
10 Some participants remembered biomechanical focused diagnoses they had been given by a  
11 healthcare practitioner they had seen many years in the past; highlighting the power and lasting  
12 influence healthcare practitioners have on their patients. For example one participant remembered  
13 the diagnosis she had received from a healthcare practitioner over 10 years ago:  
14

15 *"I had to go to the hospital once to have x-rays... I don't know if he [doctor] was trying to*  
16 *scare me into doing some exercise or something, but he basically said the only thing they*  
17 *could do is break both of my thighs and twist them a bit and then heal them back together.*  
18 *And it would take me years to get back to walking properly."* [P4].  
19

20  
21 Joint noises are a common feature of normal joint movement,<sup>[22]</sup> however participants commonly  
22 reported distress and confusion at joint noises, often finding healthcare practitioners' explanations  
23 inadequate.  
24

25 *"It was the noise that was concerning me more than the pain. I'm used to hurting. I'm too*  
26 *small to play rugby for a start, and I'd been fighting for 20 years, so, erm, it's one of those,*  
27 *you get used to the pain, but it's just the noise. When you start, you sort of [say] no, that's*  
28 *not right."* [P3].  
29

30  
31 This was in agreement with previous research, which identified negative emotions and inaccurate  
32 etiological beliefs with joint noises in patients with PFP.<sup>[36]</sup>  
33

34 Expressly linked to participants' confusion and need to find the cause of their pain was also a strong  
35 desire to pursue radiological imaging, and feelings of not being taken fully seriously by the  
36 healthcare profession when this was not forthcoming.  
37

38  
39 *"I want to know exactly what the problem is. Obviously, the doctor said, previously going*  
40 *back, they said tendonitis, and now they're saying it's runner's knee or whatever. But you*  
41 *know, it's still like, is that 100%, are you sure that's what it is? Because I was going to ask the*  
42 *doctor to send me for a MRI..."* [P8].  
43

44  
45 Previous research has linked poor outcomes with radiological imaging in populations with low back  
46 pain, suggesting an over use of imaging has a detrimental effect on outcomes.<sup>[37]</sup> There was one  
47 example of the resulting radiological findings compounding the confusion and distrust, for example  
48 Participant Six explained her feelings on a normal MRI finding as:  
49

50 *"I mean I was a bit concerned, because they didn't turn around and say, you have hurt it, but*  
51 *it's not major but this is what you've done, but they didn't actually, they said nothing's*  
52 *wrong, take the knee brace off, and carry on. [I was] almost deflated, because I was like*  
53 *wanting to know why it was hurting, but they weren't explaining any of that to me. So it's a*  
54 *bit like, difficult."* [P6].  
55

1  
2  
3 Another participant's story demonstrates the negative impact of discordance between healthcare  
4 practitioners' diagnosis and advice, further compounding confusion and mistrust:

5  
6 *"Well, it makes you wonder then which one to believe, because I'm like, 'Well okay, he's told  
7 me not to do anything until I'm pain-free, because he doesn't want me to aggravate it,' but  
8 when, when I came here, and obviously they said that it would probably be best to start  
9 putting an impact on it again ... "* [P9].  
10

11 The sense-making processes that participants described were established from past experience of  
12 healthcare treatment, past experience of pain and cultural beliefs around structure and pain.

### 14 **Theme 3: exercise and activity beliefs**

15  
16  
17 All participants identified specific beliefs regarding barriers to exercise and activity. These were  
18 informed by factors relating to: diagnosis uncertainty; cultural beliefs around pain; fear-avoidant  
19 behaviours and the iatrogenic effect of healthcare.  
20

21 Diagnosis uncertainty, contributed to participants' beliefs regarding exercise and activity. In  
22 particular, it underpinned a dilemma regarding the relationship between activity and potential harm:

23  
24 *"It's 'are you making it worse?' And that's the crux of it really. As I'm doing it and thinking, 'if  
25 this is hurting, should I really be doing this, or shall I pack this in and do something else?' But  
26 it's the not knowing ... "* [P5].  
27  
28

29 Cultural beliefs around pain being a direct sign of tissue damage was evident in a large proportion of  
30 the participants' narratives, resulting in negative behaviour towards exercise and activity.

31  
32 *"...with me it's always been, if something hurt it because your body's telling you if you do  
33 that you're going to cause more injury. You'll make things worse."* [P6].  
34  
35

36 Associated with the cultural beliefs on pain and damage was the resultant fear-avoidant behaviour.  
37 Participants, frequently contradicted themselves however; many participants would express the  
38 sentiment that they would not let the pain stop them from doing what they wanted to do, yet  
39 demonstrated clear fear-avoidant behaviours.  
40

41  
42 *"So for example, we went to [holiday resort] last year; on your feet all day, walking miles and  
43 miles, I would be, like, in tears by the end of the day. I wouldn't let it stop me the next day  
44 because I would be, like, I'm doing this"* [P4].  
45

46  
47 *"When I was in [holiday resort]; a couple of days I didn't go out and I stayed back at the  
48 hotel. Because I couldn't do it, I needed to rest."* [P4].  
49  
50

51  
52 A predominant sub-theme was the association of sport and exercise, even in the absence of pain, as  
53 a potential precursor to future joint pain and 'damage'. Some participants attributed their current  
54 PFP to past sporting activities, despite no obvious mechanisms of injury.  
55  
56  
57  
58  
59  
60

1  
2  
3 *"Another reason why I probably think this happens is because I've been very active from a*  
4 *very young age. Talking from the age of like eight or nine I've been involved in sports:*  
5 *football and cricket and badminton and whatever. I've just been all my life. And I didn't*  
6 *always see that as catching up with me, where that excessive amount of playing sports is*  
7 *having an effect on my body. [It's] going to start affecting [me] and I'm feeling it these days*  
8 *as I get older." [P8].*  
9

10  
11 A number of participants discussed the direct impact of healthcare practitioner's advice and  
12 diagnosis labelling on their exercise and activity levels, suggesting an iatrogenic effect of healthcare  
13 for PFP patients.  
14

15 *"I have been told by doctors before I shouldn't run because it would jar my knee and*  
16 *shouldn't run or walk on an uneven surface because it will wonk my knee from side to side."*  
17 *[P4].*  
18

19  
20  
21 *"But then when I started the physio at work and he told me that I shouldn't walk or that I*  
22 *shouldn't swim because he just wanted to obviously manipulate it and get me pain-free*  
23 *before I did anything that could possibly aggravate it. So I stopped." [P9].*  
24  
25

26 This theme identified a number of beliefs associated as a barrier to activity and exercise  
27 engagement. These included diagnosis uncertainty; cultural beliefs around pain; fear-avoidant  
28 behaviours and the iatrogenic effect of healthcare.  
29

#### 30 **Theme 4: behavioural coping strategies**

  
31

32  
33 A central coping strategy for participants of this study was the concept of rest. Many of them  
34 associated rest, and avoidance of activity, with the idea that time was necessary for the healing  
35 process, and that aggravating activities should be avoided.  
36

37 *"I try, obviously, sit down as much as I can." [P4].*  
38

39 One participant expressed an expectation that healthcare professionals would advise him not to  
40 continue with activity and exercise:  
41

42 **R:** *So you think physios would say no [to keep physically active]?*

43  
44 **P8:** *Physios would probably say no. Yeah, you shouldn't do it.*  
45

46 Another common coping strategy was postural adjustments; participants often talked of preferred  
47 sitting positions in relation to knee flexion.  
48

49 In keeping with previous research on the high levels of analgesic use in patients with PFP,<sup>[7]</sup> a  
50 common narrative shared with participants was the use of analgesics, with some acknowledging  
51 they were not effective.  
52

53 *"I have had some strong painkillers from the doctors. They gave me some naproxen and*  
54 *some codeine to manage it when it was at its worst but I try not to take them." [P9].*  
55  
56  
57  
58  
59

1  
2  
3 The use of knee supports was also common in the self-management strategies employed by the  
4 participants.  
5

6 *"If it hurts, it hurts. I'll try and strap my knee up. Because if I know I'm going harder in like*  
7 *gym classes, I'll strap my knees up before I go. And then when I get too much pain, I'll stop*  
8 *the exercise."* [P10].  
9

## 10 11 **Theme 5: expectations of the future**

12 A number of participants expressed views, which could be contextualised as an external locus of  
13 control, with expectations of passive physiotherapeutic treatment options.  
14  
15

16 *"I would presume manipulation of muscles groups, joints and tendons."* [P3].  
17

18 Even though the majority of participants expressed negative views about the future, they all  
19 expressed a desire to be pain free, over and above any functional improvements.  
20

21 **R:** *With the physio, what would you class as a success?*

22  
23 **P8:** *Getting rid of the pain.*  
24

25 Nine of the ten participants held negative beliefs about the future; particularly in relation to  
26 prognostic prediction following their referral to physiotherapy.  
27

28 *"But then when I'm going up the stairs and it hurts it does concern me that it's going to be*  
29 *every day for the rest of my life I'm going to be struggling to walk upstairs. And then I think*  
30 *about getting old, and I think I'm going to end up with a stair lift and living downstairs and*  
31 *that sort of thing."* [P1].  
32  
33

34  
35  
36 *"[the pain is] definitely preying on my mind. Is it gonna stop me from going into the police, is*  
37 *that gonna stop me doing the things I want to do later on in life? So yeah, it does prey on my*  
38 *mind a little bit."* [P6].  
39

40  
41 Central to their negative beliefs about the future and their prognosis was low self-efficacy.  
42 Participants felt they had very little control over their symptoms.  
43

44 *"[In] my head, my thought process is I just hate it. Do an operation. Get rid of it. In my head,*  
45 *and obviously not being from the medical profession, but I'm just like, "Just get rid of the pain*  
46 *however it can be done."* [P8].  
47  
48

49  
50 *"Yes, I'm 37 now and they feel older than that. You just get that feeling, don't you, I've*  
51 *bounced back from lots of injuries before but this is the one that is making me think. You*  
52 *know, when this gets cold I can feel it, and thinking there's already arthritis there, I'm in*  
53 *trouble, it sets the brain going."* [P3].  
54  
55  
56  
57  
58  
59  
60

1  
2  
3 Low expectation of physiotherapy, and past physiotherapy failed treatments were also a core theme  
4 within future expectations.

5  
6 *R: Have you got any expectations of what might happen when you walk in to see the physio?*

7  
8 *P10: I expect them to turn around and say physio can't help.*

9  
10  
11  
12 *"When I did get the physiotherapy it kinda didn't really do anything anyway. So it just made*  
13 *me think, it's pointless, 'cause they was trying to remove the fluid from out my knee, that like*  
14 *I say, made it worse to begin with. She did say your knees will feel sore, but it went back to*  
15 *how it was anyway, so, it just seemed like a pointless process."* [P7].  
16

17 There was one exception, with one participant having positive outlook to the future and their  
18 physiotherapy referral.

19  
20 *"Oh yeah, I think it will get better. Yeah, I'd go for the better option."* [P9].  
21

22 The main sub-themes that emerged under the future were: beliefs that their pain will get worse;  
23 external locus of control with regards to treatment; low self-efficacy; poor opinion of physiotherapy  
24 and previous failed physiotherapy treatments and an overwhelming desire to be pain free, over and  
25 above any practical goals for rehabilitation.  
26  
27

## 28 29 Discussion

### 30 31 Main Findings

32  
33 Quantitative research methodologies dominate the literature for PFP. This is the first study to use a  
34 qualitative method of inquiry to gain phenomenological data on the lived experience of people with  
35 PFP. The five major themes that emerged from the data were: (1) impact on self; (2) uncertainty,  
36 confusion and sense making; (3) exercise and activity beliefs; (4) behavioural coping strategies and  
37 (5) expectations of the future.  
38  
39

40 A key finding of this study is that loss of physical ability is profound and considerable, and plays a  
41 significant role in participants' lives; despite previous research suggesting that PFP is a benign and  
42 self-limiting condition.<sup>[5]</sup> An inability to continue with significant and meaningful activities has been  
43 identified as a cause of anxiety in people with persistent pain.<sup>[38]</sup> Persistent pain interrupts behaviour  
44 and a person's self-identity by affecting a sense of who they are, and what they might become.<sup>[39]</sup> As  
45 a result, lives are socially and environmentally restricted by persistent interruptions, or an inability  
46 to complete, or even attempt important tasks and activities.<sup>[39]</sup> With changes and loss of  
47 participants' position and role, for example with employment or family duties, the internalised  
48 meanings and expectations associated with one's self-identity is further threatened.<sup>[31]</sup>  
49  
50  
51

52 Participants expressed intense confusion around their pain and symptoms. For instance, the  
53 causative reasons were elusive and troubling, as too was the ability to predict and control the pain  
54 intensity; and any attempts that participants made at understanding were firmly within the  
55 biomechanical sphere of reasoning. An inability to make sense of pain, and the process associated  
56  
57  
58  
59  
60

1  
2  
3 with sense-making and pain-related fear has been proposed in low back pain populations.<sup>[40]</sup>  
4 Previous research has identified that an inability to make sense of pain places 'lives on hold',<sup>[41]</sup> and  
5 may lead to more 'catastrophising'.<sup>[42]</sup>  
6

7  
8 There remains scientific debate and uncertainty around the underlying aetiology of PFP,<sup>[43]</sup> and there  
9 is a large variation in the way PFP is managed by physiotherapists in the UK.<sup>[44]</sup> The majority of  
10 participants in this study had previous experience of healthcare management for PFP suggesting that  
11 variation in healthcare treatment may have a negative impact on the patients' lived experience.  
12 Historically the biomedical model of pain establishes a direct relationship between tissue structure  
13 and pain,<sup>[45]</sup> and participants characteristically attributed their pain to structure and/or anatomical  
14 problems. However several studies have recently demonstrated that structural abnormalities of the  
15 patellofemoral joint on Magnetic Resonance Imaging (MRI) are not associated with PFP.<sup>[46,47]</sup> Three  
16 participants had no previous healthcare management for PFP, but nevertheless gave a  
17 biomechanical/structural cause for their pain; all three had previous physiotherapy for other pain  
18 conditions, including back, hips and ankles. This may suggest that exposure to biomechanical  
19 approaches to the management of musculoskeletal pain in general could, potentially, have a  
20 carryover to other locations of pain, with a negative effect.  
21

22  
23 The iatrogenic effect of healthcare is an emerging field of research in the low back pain population  
24 <sup>[37,48]</sup>. This study is the first to find such a theme in patients with PFP. These findings are consistent  
25 with recent research that showed that the majority of UK physiotherapists would advise their  
26 patients not to continue with exercises if they experienced any pain.<sup>[44]</sup> The fear-avoidance model of  
27 pain is a well-established with patients with persistent pain, particularly persistent low back pain,<sup>[17]</sup>  
28 additionally research has shown that fear-avoidance behaviour may also exist with clinicians.<sup>[25,44,49]</sup>  
29 The central concept of the model is cognitions and emotions that underpin fear of the pain; fears  
30 about potential physical activities exacerbating the pain and further 'damaging' bodies. The fear  
31 leads to safety seeking behaviours and hypervigilance that paradoxically maintains or exacerbates  
32 the pain and disability.<sup>[22]</sup> In contrast, if pain is perceived in a non-threatening way patients are likely  
33 to maintain physical activity levels, through which recovery can be achieved.<sup>[50,51]</sup> All of the ten  
34 participants in this study described fear-avoidant behaviour at some stage of their interview. This is  
35 the first study, which we know of, that identifies this behaviour in patients with a diagnosis of PFP.  
36  
37

38  
39 Patellofemoral pain is often described as an 'overuse' injury,<sup>[52]</sup> and these data seem to be consistent  
40 with the patients' belief and behaviour with a definition more aligned with the English language  
41 meaning of 'overuse'. Contemporary thinking in relation to injury risk challenges the idea that PFP is  
42 simply an 'overuse' injury, with evidence suggesting that persistent and long-term under-use may be  
43 a risk factor, with consistent exposure to tissue load being considered one method of  
44 management.<sup>[53]</sup> The fear-avoidant behaviours revealed within this study would therefore be seen  
45 as negative pain behaviour, with long-term detrimental consequences.  
46  
47

48  
49 A key finding of this research is the low expectation for the future and low self-efficacy  
50 demonstrated by the majority of the participants that could be conceptualised as 'catastrophising'.  
51 Catastrophising is conceptually within the same model of pain behaviour as fear-avoidance, with  
52 largescale overlap.<sup>[19]</sup> Low self-efficacy, fear of the future and catastrophising is a common finding in  
53 patients with persistent pain.<sup>[24,54]</sup> The National Institute of Health and Care Excellence describes  
54 pain as a complex biopsychosocial issue, associated with expectations, self-efficacy, mood and  
55 coping abilities.<sup>[55]</sup> In addition, it has been shown that self-efficacy is a strong predictor of successful  
56  
57  
58  
59



1  
2  
3 outcome, irrespective of the intervention delivered, for patients with persistent pain; suggesting  
4 that rehabilitation programmes for persistent musculoskeletal pain should be designed with the aim  
5 of improving self-efficacy.<sup>[56]</sup>  
6

### 7 **Clinical and research implications**

8 This study established that a sample of patients with PFP demonstrated: pain-related fear, such as  
9 fear-avoidance; damage beliefs; difficulty with making sense of their pain; low self-efficacy and fear  
10 of the future. It may be important to address these underlying fears and beliefs with targeted  
11 therapeutic interventions; this may include an individualised biopsychosocial understanding of their  
12 pain, in conjunction with a tailored rehabilitation programme for functional restoration; such an  
13 approach has produced superior outcomes to usual treatment for persistent low back pain,<sup>[57]</sup> with  
14 promising early results in shoulder pain.<sup>[58]</sup>  
15  
16

17  
18 The current consensus that best evidence treatments consisting of hip and knee strengthening may  
19 not be adequate to address the fears and beliefs identified in the current study. Future studies are  
20 needed to explore biopsychosocial targeted interventions for this population, particularly in relation  
21 to pain experienced by patients during exercise, followed by efficacy and effectiveness trials.  
22 Interventions may be patient education packages and self-management strategies targeting self-  
23 efficacy and physical activity. Furthermore, future qualitative work will be beneficial to understand  
24 the role of medical terminology commonly used with this patient group, for example, 'weakness'  
25 and 'patellar mal-tracking',<sup>[44]</sup> and its impact and interpretation by patients.  
26  
27

### 28 **Study limitations and strengths**

29 Two authors independently coded all transcripts, and this study employed a clear, transparent and  
30 reproducible methodological approach to data analysis. The authors make it clear that their clinical  
31 and research experience lie within the biopsychosocial framework of musculoskeletal pain and this  
32 study forms part of a larger body of research looking at pain education, self-management strategies  
33 and exercise interventions for individuals with PFP.<sup>[59]</sup> It is worth noting that the interviewer made it  
34 explicit to the participants that he was a physiotherapist; indeed a number of them did proceed to  
35 ask clinical questions about their condition, highlighting a power dynamic between the interviewer  
36 and participant. This may, in part, have influenced their responses.  
37  
38  
39

40 The main limitation of this study is that for pragmatic reasons a convenience sampling technique  
41 was used. It is possible that this sample may differ from other samples within the UK, and how  
42 representative these findings are to the greater population of individuals with PFP is unknown. A  
43 purposive sampling technique may have better represented sociodemographic groups, or targeted  
44 identifiable subgroups. However, it is worth noting that the sample in this study had a good  
45 representation of male and females, and included a variety of ethnic groups; additionally, population  
46 age, gender and duration of symptoms were similar to larger NHS based studies on PFP;<sup>[60]</sup> it is  
47 therefore questionable how different the data would be.  
48  
49  
50

### 51 **Conclusion**

52 These findings offer an insight into the lived experience of individuals with PFP. Previous literature  
53 have focused on pain and biomechanics, rather than the individual experience, attached meanings  
54 and any wider context within a sociocultural perspective. The participants provided rich and detailed  
55  
56  
57  
58  
59

1  
2  
3 narratives of loss of physical and functional ability; loss of self-identity; pain related confusion and  
4 difficulty making sense of their pain; pain-related fear, including fear-avoidance and 'damage'  
5 beliefs; inappropriate coping strategies and fear of the future. Our findings suggest future research is  
6 warranted into biopsychosocial targeted interventions and the impact and interpretation of medical  
7 terminology.  
8  
9

## 10 **Authors' contributions**

11 BES was responsible for conception and design, compiling the interview schedule, interviewing,  
12 transcribing, coding, analysis and interpretation, drafting and revising the manuscript. FM was  
13 responsible for conception and design, compiling the interview schedule, coding, analysis and  
14 interpretation, drafting and revising the manuscript. PH, MB, JS, MR, TS and PL were involved in  
15 conception and design, interpretation and reviewing revisions to the manuscript. All authors have  
16 read and approved of the final manuscript.  
17  
18  
19

## 20 **Funding**

21 This report is independent research arising from a Clinical Doctoral Research Fellowship, Benjamin  
22 Smith, ICA-CDRF-2015-01-002 supported by the National Institute for Health Research (NIHR) and  
23 Health Education England (HEE). The views expressed in this publication are those of the author(s)  
24 and not necessarily those of the NHS, the NIHR, HEE or the Department of Health.  
25  
26  
27  
28

## 29 **Competing interests**

30 The authors declare that they have no competing interests.  
31  
32  
33

## 34 **Ethics approval**

35 This study was approved by the West Midlands - Black Country Research Ethics Committee  
36 (16/WM/0414).  
37  
38  
39

## 40 **Availability of data**

41 Quotations and further details are available from Benjamin Smith at [benjamin.smith3@nhs.net](mailto:benjamin.smith3@nhs.net)  
42  
43  
44  
45  
46  
47  
48  
49  
50  
51  
52  
53  
54  
55  
56  
57  
58  
59  
60

## References

- 1 Dey P, Callaghan M, Cook N, *et al.* A questionnaire to identify patellofemoral pain in the community: an exploration of measurement properties. *BMC Musculoskelet Disord* 2016;17:237. doi:10.1186/s12891-016-1097-5
- 2 Urwin M, Symmons D, Allison T, *et al.* Estimating the burden of musculoskeletal disorders in the community: the comparative prevalence of symptoms at diVerent anatomical sites, and the relation to social deprivation. *Ann Rheum Dis* 1998;57:649–55.
- 3 Jordan KP, Kadam UT, Hayward R, *et al.* Annual consultation prevalence of regional musculoskeletal problems in primary care: an observational study. *BMC Musculoskelet Disord* 2010;11:144. doi:10.1186/1471-2474-11-144
- 4 Crossley KM, Stefanik JJ, Selfe J, *et al.* 2016 Patellofemoral pain consensus statement from the 4th International Patellofemoral Pain Research Retreat, Manchester. Part 1: Terminology, definitions, clinical examination, natural history, patellofemoral osteoarthritis and patient-reported outcome m. *Br J Sports Med* 2016;50:839–43.
- 5 Sandow MJ, Goodfellow JW. The natural history of anterior knee pain in adolescents. *J Bone Joint Surg Br* 1985;67:36–8.
- 6 Collins NJ, Bierma-Zeinstra SMA, Crossley KM, *et al.* Prognostic factors for patellofemoral pain: a multicentre observational analysis. *Br J Sports Med* 2013;47:227–33. doi:10.1136/bjsports-2012-091696
- 7 Stathopulu E, Baidam E. Anterior knee pain: a long-term follow-up. *Rheumatology (Oxford)* 2003;42:380–2.
- 8 Rathleff MS, Rasmussen S, Olesen JL. Unsatisfactory long-term prognosis of conservative treatment of patellofemoral pain syndrome. *Ugeskr Laeger* 2012;174:1008–13.
- 9 Smith BE, Hendrick P, Logan P. Patellofemoral pain: Challenging current practice - A case report. *Man Ther* 2016;22:216–9. doi:10.1016/j.math.2015.09.002
- 10 Doménech J, Sanchis-Alfonso V, López L, *et al.* Influence of kinesiphobia and catastrophizing on pain and disability in anterior knee pain patients. *Knee Surgery, Sport Traumatol Arthrosc* 2013;21:1562–8. doi:10.1007/s00167-012-2238-5
- 11 Piva SR, Fitzgerald GK, Wisniewski S, *et al.* Predictors of pain and function outcome after rehabilitation in patients with patellofemoral pain syndrome. *J Rehabil Med* 2009;41:604–12. doi:10.2340/16501977-0372
- 12 Piva SR, Fitzgerald GK, Irrgang JJ, *et al.* Associates of Physical Function and Pain in Patients with Patellofemoral Pain Syndrome. *Arch Phys Med Rehabil* 2009;90:285–95. doi:10.1016/j.apmr.2008.08.214
- 13 Quartana PJ, Campbell CM, Edwards RR. Pain catastrophizing: a critical review. *Expert Rev Neurother* 2009;9:745–58. doi:10.1586/ern.09.34
- 14 Moseley GL, Arntz A. The context of a noxious stimulus affects the pain it evokes. *PAIN®* 2007;133:64–71.
- 15 Harvie DS, Broecker M, Smith RT, *et al.* Bogus visual feedback alters onset of movement-evoked pain in people with neck pain. *Psychol Sci* 2015;:956797614563339.

- 1  
2  
3 16 Lobanov O V, Zeidan F, McHaffie JG, *et al.* From cue to meaning: Brain mechanisms supporting the construction of expectations of pain. *PAIN*® 2014;155:129–36.
- 4  
5  
6 17 Chou R, Shekelle P. Will this patient develop persistent disabling low back pain? *JAMA* 2010;303:1295–302. doi:10.1001/jama.2010.344
- 7  
8  
9 18 Mallows A, Debenham J, Walker T, *et al.* Association of psychological variables and outcome in tendinopathy: a systematic review. *Br J Sports Med* 2016;bjsports-2016.
- 10  
11  
12 19 Wertli MM, Rasmussen-Barr E, Weiser S, *et al.* The role of fear avoidance beliefs as a prognostic factor for outcome in patients with nonspecific low back pain: a systematic review. *spine J* 2014;14:816–36.
- 13  
14  
15 20 Osborn M, Smith JA. The personal experience of chronic benign lower back pain: An interpretative phenomenological analysis. *Br J Pain* 2015;9:65–83.
- 16  
17  
18 21 Smith JA, Osborn M. Pain as an assault on the self: An interpretative phenomenological analysis of the psychological impact of chronic benign low back pain. *Psychol Heal* 2007;22:517–34.
- 19  
20  
21  
22 22 Jones S, Hanchard N, Hamilton S, *et al.* A qualitative study of patients' perceptions and priorities when living with primary frozen shoulder. *BMJ Open* 2013;3:e003452.
- 23  
24  
25 23 Walker J, Holloway I, Sofaer B. In the system: the lived experience of chronic back pain from the perspectives of those seeking help from pain clinics. *Pain* 1999;80:621–8.
- 26  
27  
28 24 Walker J, Sofaer B, Holloway I. The experience of chronic back pain: accounts of loss in those seeking help from pain clinics. *Eur J Pain* 2006;10:199.
- 29  
30  
31 25 Nijs J, Roussel N, Paul van Wilgen C, *et al.* Thinking beyond muscles and joints: Therapists' and patients' attitudes and beliefs regarding chronic musculoskeletal pain are key to applying effective treatment. *Man Ther* 2013;18:96–102.
- 32  
33  
34 26 Braun V, Clarke V. Using thematic analysis in psychology. *Qual Res Psychol* 2006;3:77–101.
- 35  
36  
37 27 Tong A, Sainsbury P, Craig J. Consolidated criteria for reporting qualitative research (COREQ): a 32-item checklist for interviews and focus groups. *Int J Qual Heal care* 2007;19:349–57.
- 38  
39  
40 28 Mc Auliffe S, Synott A, Casey H, *et al.* Beyond the tendon: Experiences and perceptions of people with persistent Achilles tendinopathy. *Musculoskelet Sci Pract* 2017;29:108–14.
- 41  
42  
43 29 Leary MR, Tangney JP. *Handbook of self and identity*. Guilford Press 2011.
- 44  
45  
46 30 Baumeister RF. *The self in social psychology*. 1999.
- 47  
48  
49 31 Stryker S, Burke PJ. The past, present, and future of an identity theory. *Soc Psychol Q* 2000;:284–97.
- 50  
51  
52 32 Lamé IE, Peters ML, Vlaeyen JWS, *et al.* Quality of life in chronic pain is more associated with beliefs about pain, than with pain intensity. *Eur J Pain* 2005;9:15–24.
- 53  
54  
55 33 Aldrich S, Eccleston C. Making sense of everyday pain. *Soc Sci Med* 2000;50:1631–41.
- 56  
57  
58 34 Charmaz K. From the 'sick role' to stories of self: Understanding the self in illness. *Rutgers Ser Self Soc Identity* 1999;2:209–39.
- 59  
60

- 1  
2  
3 35 Johansson EE, Hamberg K, Westman G, *et al.* The meanings of pain: an exploration of  
4 women's descriptions of symptoms. *Soc Sci Med* 1999;48:1791–802.
- 5  
6 36 Robertson CJ, Hurley M, Jones F. People's beliefs about the meaning of crepitus in  
7 patellofemoral pain and the impact of these beliefs on their behaviour: A qualitative study.  
8 *Musculoskelet Sci Pract* 2017;28:59–64. doi:10.1016/j.msksp.2017.01.012
- 9  
10 37 Webster BS, Bauer AZ, Choi Y, *et al.* Iatrogenic consequences of early magnetic resonance  
11 imaging in acute, work-related, disabling low back pain. *Spine (Phila Pa 1976)* 2013;38:1939–  
12 46.
- 13  
14 38 Roy R. *Chronic pain, loss and suffering*. University of Toronto Press 2004.
- 15  
16 39 Harris S, Morley S, Barton SB. Role loss and emotional adjustment in chronic pain. *Pain*  
17 2003;105:363–70.
- 18  
19 40 Bunzli S, Smith A, Schütze R, *et al.* Beliefs underlying pain-related fear and how they evolve: a  
20 qualitative investigation in people with chronic back pain and high pain-related fear. *BMJ*  
21 *Open* 2015;5.
- 22  
23 41 Bunzli S, Watkins R, Smith A, *et al.* Lives on hold: a qualitative synthesis exploring the  
24 experience of chronic low-back pain. *Clin J Pain* 2013;29:907–16.
- 25  
26 42 van Wilgen CP, van Ittersum MW, Kaptein AA, *et al.* Illness perceptions in patients with  
27 fibromyalgia and their relationship to quality of life and catastrophizing. *Arthritis Rheum*  
28 2008;58:3618–26.
- 29  
30 43 Doménech J, Sanchis-Alfonso V, Espejo B. Changes in catastrophizing and kinesiophobia are  
31 predictive of changes in disability and pain after treatment in patients with anterior knee  
32 pain. *Knee Surg Sports Traumatol Arthrosc* 2014;22:2295–300. doi:10.1007/s00167-014-  
33 2968-7
- 34  
35 44 Smith BE, Hendrick P, Bateman M, *et al.* Current Management Strategies for Patellofemoral  
36 Pain: An online survey of 99 practising UK physiotherapists. *BioMed Cent Musculoskelet*  
37 *Disord* 2017;18. doi:10.1186/s12891-017-1539-8
- 38  
39 45 Doménech J, Sanchis-Alfonso V, Espejo B. Influence of Psychological Factors on Pain and  
40 Disability in Anterior Knee Pain Patients. In: *Anterior Knee Pain and Patellar Instability*.  
41 London: : Springer London 2011. 123–35. doi:10.1007/978-0-85729-507-1\_9
- 42  
43 46 van der Heijden RA, Oei EHG, Bron EE, *et al.* No Difference on Quantitative Magnetic  
44 Resonance Imaging in Patellofemoral Cartilage Composition Between Patients With  
45 Patellofemoral Pain and Healthy Controls. *Am J Sports Med* 2016;44:1172–8.  
46 doi:10.1177/0363546516632507
- 47  
48 47 van der Heijden RA, de Kanter JLM, Bierma-Zeinstra SMA, *et al.* Structural Abnormalities on  
49 Magnetic Resonance Imaging in Patients With Patellofemoral Pain: A Cross-sectional Case-  
50 Control Study. *Am J Sports Med* 2016;44:2339–46. doi:10.1177/0363546516646107
- 51  
52 48 Lin IB, O'Sullivan PB, Coffin JA, *et al.* Disabling chronic low back pain as an iatrogenic disorder:  
53 a qualitative study in Aboriginal Australians. *BMJ Open* 2013;3:1–8.
- 54  
55 49 Littlewood C, Lowe A, Moore J. Rotator cuff disorders: a survey of current UK physiotherapy  
56 practice. *Shoulder Elb* 2012;4:64–71. doi:10.1111/j.1758-5740.2011.00164.x
- 57  
58  
59

- 1  
2  
3 50 Leeuw M, Goossens MEJB, Linton SJ, *et al.* The fear-avoidance model of musculoskeletal pain: current state of scientific evidence. *J Behav Med* 2007;30:77–94. doi:10.1007/s10865-006-9085-0
- 4  
5  
6  
7 51 Vlaeyen JW, Linton SJ. Fear-avoidance and its consequences in chronic musculoskeletal pain: a state of the art. *Pain* 2000;85:317–32.
- 8  
9  
10 52 Herrington L, Nester C. Q-angle undervalued? The relationship between Q-angle and medio-lateral position of the patella. *Clin Biomech (Bristol, Avon)* 2004;19:1070–3. doi:10.1016/j.clinbiomech.2004.07.010
- 11  
12  
13  
14 53 Gabbett TJ. The training-injury prevention paradox: should athletes be training smarter and harder? *Br J Sports Med* 2016;50:273–80. doi:10.1136/bjsports-2015-095788
- 15  
16  
17 54 Arnstein P, Caudill M, Mandle CL, *et al.* Self efficacy as a mediator of the relationship between pain intensity, disability and depression in chronic pain patients. *Pain* 1999;80:483–91.
- 18  
19  
20 55 National Institute for Clinical Excellence. Osteoarthritis: care and management. 2014.
- 21  
22 56 Miles CL, Pincus T, Carnes D, *et al.* Can we identify how programmes aimed at promoting self-management in musculoskeletal pain work and who benefits? A systematic review of subgroup analysis within RCTs. *Eur J Pain* 2011;15. doi:10.1016/j.ejpain.2011.01.016
- 23  
24  
25 57 Vibe Fersum K, O’Sullivan P, Skouen JS, *et al.* Efficacy of classification-based cognitive functional therapy in patients with non-specific chronic low back pain: A randomized controlled trial. *Eur J pain* 2013;17:916–28.
- 26  
27  
28  
29 58 Littlewood C, Bateman M, Brown K, *et al.* A self-managed single exercise programme versus usual physiotherapy treatment for rotator cuff tendinopathy: A randomised controlled trial (the SELF study). *Clin Rehabil* 2016;30:686–96. doi:10.1177/0269215515593784
- 30  
31  
32  
33 59 Smith BE, Hendrick P, Bateman M, *et al.* Study protocol: a mixed methods feasibility study for a loaded self-managed exercise programme for patellofemoral pain. *Pilot Feasibility Stud* 2017;(In Press).
- 34  
35  
36  
37 60 Selfe J, Janssen J, Callaghan M, *et al.* Are there three main subgroups within the patellofemoral pain population? A detailed characterisation study of 127 patients to help develop targeted intervention (TIPPs). *Br J Sport Med* 2016;50:873–80.
- 38  
39  
40  
41  
42  
43  
44  
45  
46  
47  
48  
49  
50  
51  
52  
53  
54  
55  
56  
57  
58  
59  
60

## Consolidated criteria for reporting qualitative studies (COREQ): 32-item checklist

Developed from:

Tong A, Sainsbury P, Craig J. Consolidated criteria for reporting qualitative research (COREQ): a 32-item checklist for interviews and focus groups. *International Journal for Quality in Health Care*. 2007. Volume 19, Number 6: pp. 349 – 357

**YOU MUST PROVIDE A RESPONSE FOR ALL ITEMS. ENTER N/A IF NOT APPLICABLE**

| No. Item                                       | Guide questions/description                                                                                                                              | Reported on Page # |
|------------------------------------------------|----------------------------------------------------------------------------------------------------------------------------------------------------------|--------------------|
| <b>Domain 1: Research team and reflexivity</b> |                                                                                                                                                          |                    |
| <i>Personal Characteristics</i>                |                                                                                                                                                          |                    |
| 1. Interviewer/facilitator                     | Which author/s conducted the interview or focus group?                                                                                                   | Page 5             |
| 2. Credentials                                 | What were the researcher's credentials?<br>E.g. PhD, MD                                                                                                  | Page 5             |
| 3. Occupation                                  | What was their occupation at the time of the study?                                                                                                      | Page 5             |
| 4. Gender                                      | Was the researcher male or female?                                                                                                                       | Page 5             |
| 5. Experience and training                     | What experience or training did the researcher have?                                                                                                     | Page 5             |
| <i>Relationship with participants</i>          |                                                                                                                                                          |                    |
| 6. Relationship established                    | Was a relationship established prior to study commencement?                                                                                              | Page 5             |
| 7. Participant knowledge of the interviewer    | What did the participants know about the researcher? e.g. personal goals, reasons for doing the research                                                 | Page 5             |
| 8. Interviewer characteristics                 | What characteristics were reported about the interviewer/facilitator? e.g. Bias, assumptions, reasons and interests in the research topic                | Page 5 & 15        |
| <b>Domain 2: study design</b>                  |                                                                                                                                                          |                    |
| <i>Theoretical framework</i>                   |                                                                                                                                                          |                    |
| 9. Methodological orientation and Theory       | What methodological orientation was stated to underpin the study? e.g. grounded theory, discourse analysis, ethnography, phenomenology, content analysis | Page 5             |
| <i>Participant selection</i>                   |                                                                                                                                                          |                    |
| 10. Sampling                                   | How were participants selected? e.g. purposive, convenience, consecutive, snowball                                                                       | Page 5             |
| 11. Method of approach                         | How were participants approached? e.g. face-to-face, telephone, mail, email                                                                              | Page 5             |
| 12. Sample size                                | How many participants were in the study?                                                                                                                 | Page 5             |

|                                        |                                                                                                                                 |            |
|----------------------------------------|---------------------------------------------------------------------------------------------------------------------------------|------------|
| 13. Non-participation                  | How many people refused to participate or dropped out? Reasons?                                                                 | Page 5     |
| <i>Setting</i>                         |                                                                                                                                 |            |
| 14. Setting of data collection         | Where was the data collected? e.g. home, clinic, workplace                                                                      | Page 5     |
| 15. Presence of non-participants       | Was anyone else present besides the participants and researchers?                                                               | Page 5     |
| 16. Description of sample              | What are the important characteristics of the sample? e.g. demographic data, date                                               | Page 7     |
| <i>Data collection</i>                 |                                                                                                                                 |            |
| 17. Interview guide                    | Were questions, prompts, guides provided by the authors? Was it pilot tested?                                                   | Page 5     |
| 18. Repeat interviews                  | Were repeat inter views carried out? If yes, how many?                                                                          | N/A        |
| 19. Audio/visual recording             | Did the research use audio or visual recording to collect the data?                                                             | Page 5     |
| 20. Field notes                        | Were field notes made during and/or after the inter view or focus group?                                                        | Page 5 & 6 |
| 21. Duration                           | What was the duration of the inter views or focus group?                                                                        | Page 7     |
| 22. Data saturation                    | Was data saturation discussed?                                                                                                  | Page 6     |
| 23. Transcripts returned               | Were transcripts returned to participants for comment and/or correction?                                                        | N/A        |
| <b>Domain 3: analysis and findings</b> |                                                                                                                                 |            |
| <i>Data analysis</i>                   |                                                                                                                                 |            |
| 24. Number of data coders              | How many data coders coded the data?                                                                                            | Page 6     |
| 25. Description of the coding tree     | Did authors provide a description of the coding tree?                                                                           | N/A        |
| 26. Derivation of themes               | Were themes identified in advance or derived from the data?                                                                     | Page 6     |
| 27. Software                           | What software, if applicable, was used to manage the data?                                                                      | NVivo      |
| 28. Participant checking               | Did participants provide feedback on the findings?                                                                              | NO         |
| <i>Reporting</i>                       |                                                                                                                                 |            |
| 29. Quotations presented               | Were participant quotations presented to illustrate the themes/findings? Was each quotation identified? e.g. participant number | Results    |
| 30. Data and findings consistent       | Was there consistency between the data presented and the findings?                                                              | Page 13    |
| 31. Clarity of major themes            | Were major themes clearly presented in the findings?                                                                            | RESULTS    |
| 32. Clarity of minor themes            | Is there a description of diverse cases or discussion of minor themes?                                                          | Discussion |

**Once you have completed this checklist, please save a copy and upload it as part of your submission. When requested to do so as part of the upload process, please select the file type: *Checklist*. You will NOT be able to proceed with**



1  
2  
3  
4  
5  
6  
7  
8  
9  
10  
11  
12  
13  
14  
15  
16  
17  
18  
19  
20  
21  
22  
23  
24  
25  
26  
27  
28  
29  
30  
31  
32  
33  
34  
35  
36  
37  
38  
39  
40  
41  
42  
43  
44  
45  
46  
47  
48  
49  
50  
51  
52  
53  
54  
55  
56  
57  
58  
59  
60

**submission unless the checklist has been uploaded. Please DO NOT include this checklist as part of the main manuscript document. It must be uploaded as a separate file.**

For peer review only

# BMJ Open

## The experience of living with patellofemoral pain: loss, confusion and fear-avoidance

|                                 |                                                                                                                                                                                                                                                                                                                                                                                                                                                                                                                                                                                                                                                                                                                                                                                                                                                                                                                                                                                                                                                                               |
|---------------------------------|-------------------------------------------------------------------------------------------------------------------------------------------------------------------------------------------------------------------------------------------------------------------------------------------------------------------------------------------------------------------------------------------------------------------------------------------------------------------------------------------------------------------------------------------------------------------------------------------------------------------------------------------------------------------------------------------------------------------------------------------------------------------------------------------------------------------------------------------------------------------------------------------------------------------------------------------------------------------------------------------------------------------------------------------------------------------------------|
| Journal:                        | <i>BMJ Open</i>                                                                                                                                                                                                                                                                                                                                                                                                                                                                                                                                                                                                                                                                                                                                                                                                                                                                                                                                                                                                                                                               |
| Manuscript ID                   | bmjopen-2017-018624.R1                                                                                                                                                                                                                                                                                                                                                                                                                                                                                                                                                                                                                                                                                                                                                                                                                                                                                                                                                                                                                                                        |
| Article Type:                   | Research                                                                                                                                                                                                                                                                                                                                                                                                                                                                                                                                                                                                                                                                                                                                                                                                                                                                                                                                                                                                                                                                      |
| Date Submitted by the Author:   | 24-Oct-2017                                                                                                                                                                                                                                                                                                                                                                                                                                                                                                                                                                                                                                                                                                                                                                                                                                                                                                                                                                                                                                                                   |
| Complete List of Authors:       | Smith, Benjamin; Derby Teaching Hospitals NHS Foundation Trust, Physiotherapy Outpatients; University of Nottingham, Division of Rehabilitation and Ageing, School of Medicine<br>Moffatt, Fiona; University of Nottingham, Division of Physiotherapy and Rehabilitation Sciences, School of Health Sciences,<br>Hendrick, Paul ; University of Nottingham, Division of Physiotherapy and Rehabilitation Sciences, School of Health Sciences<br>Bateman, Marcus; Derby Teaching Hospitals NHS Foundation Trust, Physiotherapy Outpatients<br>Rathleff, Michael ; Aalborg University, Research Unit for General Practice in Aalborg, Department of Clinical Medicine ; Aalborg University Hospital, Department of Occupational Therapy and Physiotherapy, Department of Clinical Medicine<br>Selfe, James; Manchester Metropolitan University, Department of Health Professions<br>Smith, Toby O.; University of East Anglia, Faculty of Medicine and Health Sciences<br>Logan, Phillipa; University of Nottingham , Division of Rehabilitation and Ageing, School of Medicine |
| <b>Primary Subject Heading</b>: | Qualitative research                                                                                                                                                                                                                                                                                                                                                                                                                                                                                                                                                                                                                                                                                                                                                                                                                                                                                                                                                                                                                                                          |
| Secondary Subject Heading:      | Rehabilitation medicine, Sports and exercise medicine                                                                                                                                                                                                                                                                                                                                                                                                                                                                                                                                                                                                                                                                                                                                                                                                                                                                                                                                                                                                                         |
| Keywords:                       | patellofemoral pain, anterior knee pain, PFP                                                                                                                                                                                                                                                                                                                                                                                                                                                                                                                                                                                                                                                                                                                                                                                                                                                                                                                                                                                                                                  |
|                                 |                                                                                                                                                                                                                                                                                                                                                                                                                                                                                                                                                                                                                                                                                                                                                                                                                                                                                                                                                                                                                                                                               |

SCHOLARONE™  
Manuscripts

## The experience of living with patellofemoral pain: loss, confusion and fear-avoidance

Benjamin E Smith<sup>1,2,\*</sup>, Fiona Moffatt<sup>3</sup>, Paul Hendrick<sup>3</sup>, Marcus Bateman<sup>1</sup>, Michael Skovdal Rathleff<sup>4,5</sup>, James Selfe<sup>6</sup>, Toby O Smith<sup>7</sup>, Pip Logan<sup>2</sup>

<sup>1</sup>Derby Teaching Hospitals NHS Foundation Trust, Physiotherapy Department (Level 3), London Road Community Hospital, Derby DE1 2QY, UK

<sup>2</sup>Division of Rehabilitation and Ageing, School of Medicine, University of Nottingham, Nottingham, UK

<sup>3</sup>Division of Physiotherapy and Rehabilitation Sciences, School of Health Sciences, University of Nottingham, Nottingham University Hospitals (City Campus), Nottingham, UK.

<sup>4</sup>Research Unit for General Practice in Aalborg, Department of Clinical Medicine at Aalborg University, Aalborg, Denmark

<sup>5</sup>Department of Occupational Therapy and Physiotherapy, Department of Clinical Medicine, Aalborg University Hospital, Denmark

<sup>6</sup>Department of Health Professions, Manchester Metropolitan University, Manchester, UK

<sup>7</sup>Faculty of Medicine and Health Sciences, University of East Anglia, Norwich, UK

\*Corresponding author. Tel: 01332 254631 Email: [benjamin.smith3@nhs.net](mailto:benjamin.smith3@nhs.net)

## Abstract

### Objectives:

To investigate the experience of living with patellofemoral pain.

### Design:

Qualitative study design using semi-structured interviews, and analysed thematically using the guidelines set out by Braun and Clarke.

### Setting:

A National Health Service (NHS) physiotherapy clinic within a large UK teaching hospital.

### Participants:

A convenience sample of ten participants, aged between 18 and 40, with a diagnosis of patellofemoral pain and on a physiotherapy waiting list, prior to starting physiotherapy.

### Results:

Participants offered rich and detailed accounts of the impact and lived experience of patellofemoral pain, including: loss of physical and functional ability; loss of self-identity; pain related confusion and difficulty making sense of their pain; pain related fear, including fear-avoidance and 'damage' beliefs; inappropriate coping strategies and fear of the future. The five major themes that emerged from the data were: (1) impact on self; (2) uncertainty, confusion and sense making; (3) exercise and activity beliefs; (4) behavioural coping strategies and (5) expectations of the future.

### Conclusions:

These findings offer an insight into the lived experience of individuals with patellofemoral pain. Previous literature has focused on pain and biomechanics, rather than the individual experience, attached meanings and any wider context within a sociocultural perspective. Our findings suggest future research is warranted into biopsychosocial targeted interventions aimed at the beliefs and pain related fear for people with patellofemoral pain. The current consensus that best-evidence treatments consisting of hip and knee strengthening may not be adequate to address the fears and beliefs identified in the current study. Further qualitative research may be warranted on the impact and interpretation of medical terminology commonly used with this patient group, for example, 'weakness' and 'patellar mal-tracking' and its impact and interpretation by patients.

### Trial registration:

ISRCTN 35272486

## Article Summary

### Strengths and limitations of this study:

- This is the first study to use a qualitative method of inquiry on the experience of people living with patellofemoral pain.
- Two authors independently coded all transcripts, and a clear, transparent and reproducible methodological approach was used in the thematic analysis.
- For pragmatic reasons a convenience sampling technique was used.

## Introduction

Patellofemoral pain (PFP) is one of the most common and costly forms of knee pain.<sup>[1-3]</sup> It has an estimated prevalence of 23% in the general population in the UK.<sup>[1]</sup> Symptoms typically include retro-patellar or diffuse peripatellar pain, aggravated by activities that load the joint, such as climbing and descending stairs, squatting and running.<sup>[4]</sup>

Historically PFP has been labelled a “benign, self-limiting condition”, that improves over time with little intervention indicated.<sup>[5]</sup> However, this belief has recently been challenged with data suggesting that the overall long-term prognosis for the majority of patients with PFP is poor.<sup>[6]</sup> Only one third of patients are pain-free one year after diagnosis,<sup>[6]</sup> and 91% still report pain and dysfunction four years post-diagnosis.<sup>[7]</sup> Quantitative data suggests that some patients withdraw from participation in physical activities,<sup>[8,9]</sup> and may develop associated psychological distress, such as fear-avoidance and catastrophising thoughts in relation to their knee pain.<sup>[10-12]</sup>

The biopsychosocial model of persistent pain has recognised that psychological factors, such as fear and catastrophising can, through changes to behaviour, modulate physiological responses to pain with the development and maintenance of persistent pain.<sup>[13-17]</sup> Psychological distress has been identified in low back pain and tendon pain populations through systematic reviews,<sup>[18,19]</sup> and qualitative methods in low back and shoulder populations,<sup>[20-22]</sup> however to our knowledge this has not been investigated in PFP. Advocates of qualitative research methods suggest that qualitative inquiry can disclose the experience of people with pain, and therefore be used to understand patient motivation, social engagement and provide a wealth of information about the sociocultural context to pain.<sup>[23,24]</sup> Contemporary models of persistent pain have identified the importance of thinking beyond muscles and joints,<sup>[25]</sup> and qualitative inquiry can provide an insight that may lead to development of ideas and hypothesis generation within the context of the biopsychosocial model of pain. No study using qualitative methods has been published regarding PFP. Therefore the aim of this study was to give a more detailed account of the experience of people living with PFP, seeking secondary care within the UK.

## Method

In order to address gaps in the literature this research focused on identifying themes within the participants' experience of living with PFP. A qualitative interpretive description design was chosen as an appropriate methodological approach.<sup>[26]</sup> Thematic analysis is the most appropriate method for this type of inquiry, as codes and themes can be created inductively to capture meaning and content without prior preconceptions allowing flexibility to generate a rich and detailed account of the data.<sup>[27]</sup>

In this study, data were analysed thematically using the guidelines set out by Braun and Clarke,<sup>[27]</sup> and was reported in line with the COnsolidated criteria for REporting Qualitative research (COREQ) checklist (see supplementary file 1).<sup>[28]</sup>

Braun and Clarke<sup>[27]</sup> describe a multi-stage approach to thematic data analysis; demonstrating clear distinction of the thematic approach, whilst allowing for the inherent flexibility in the process. They reasoned that a thematic analysis can be conducted from a both realist and constructionist paradigms, although with differing outcomes. A realist approach allows theories about individual motivation and meaning to be developed, since the epistemological position is that there is a unidirectional relationship between meaning, experience and language<sup>[27]</sup>. A constructionist perspective differs, as meaning and experience are socially produced and knowledge a human and social construct; therefore theories about individual motivation and meaning are inappropriate, and theories focus instead on sociocultural contexts<sup>[27]</sup>. This study did not set out to prove or disprove a hypotheses; it set out to generate new data from which an understanding of living with PFP might be developed. The authors wanted to take an epistemological position that recognises the experience at an individual level, and any meanings attached, whilst considering the wider context within a sociocultural perspective. Sitting central on the spectrum of realism and constructivism, this position is described as "contextualist" by Braun and Clarke<sup>[27]</sup>.

## Recruitment

A convenience sample of ten participants with a diagnosis of PFP were recruited from an NHS physiotherapy waiting list. Based on similar studies of other musculoskeletal conditions, we anticipate this sample size would be sufficient to reach data saturation.<sup>[22,29]</sup> Participants were initially contacted by mail and followed up by a telephone call (BES). Thirty four information sheets were sent out, and 24 potential participants were contacted by telephone; two could not make the interview before physiotherapy was due to start; five people physiotherapy had already commenced; one reported resolution of symptoms; and six declined to participate. Inclusion criteria were participants aged 18 to 40 with signs and symptoms of PFP, defined as: anterior or retro-patellar pain reported on at least two of the following activities; prolonged sitting, ascending or descending stairs, squatting, jumping and running.<sup>[4]</sup> These were pre-screened during an initial telephone conversation. Exclusion criteria included: previous knee surgery; awaiting lower limb surgery; knee ligamentous instability; history of patellar dislocation; true knee locking or giving way; reasons to suspect systemic pathology, or acute illness; pregnancy or breast feeding; patellar or iliotibial tract tendinopathy; and those not able to speak or understand English. The exclusion criteria were screened prior to consent being taken (BES).

## Data Collection

1  
2  
3 Participants were offered interviews at their home, or in a hospital-based physiotherapy  
4 department; all opted to be interviewed at the hospital. On arrival the researcher (BES) introduced  
5 himself as a physiotherapist working in that department, and also a researcher conducting a PhD.  
6 The researcher explained the aims of the study. Written consent and verbal consent was taken to  
7 start recording.  
8

9  
10 With reference to previous literature on low back pain, shoulder pain and tendon pain,<sup>[20–22]</sup> semi-  
11 structured interviews were designed by the researchers using a topic guideline with prompts to  
12 explore participants' experience of: living with PFP; past healthcare management; their  
13 interpretation of causation of their pain; beliefs, attitudes and behaviour in relation to their pain and  
14 expectations for the future. The semi-structured interviews allowed for a flexible interview, in a two-  
15 way conversation, allowing new ideas to be developed as they were brought up.  
16

17  
18 The researcher also maintained a reflective journal, noting down initial thoughts and ideas after  
19 each interview.<sup>[22]</sup> This identified that early interviews raised issues about other (past and present)  
20 musculoskeletal pain, and specific coping strategies employed by participants for their PFP. These  
21 were therefore incorporated into subsequent interview schedules.  
22

### 23 **Data Analysis**

24 All audio files were collected and transcribed verbatim (BES). During transcription, initial thoughts  
25 and ideas were noted in the reflective journal. Audio files were listened to several times to check for  
26 accuracy, and transcriptions were read and re-read a number of times; this initial process of data  
27 familiarisation allowed for 'data immersion' by the researchers, and generation of preliminary  
28 ideas.<sup>[27]</sup> Data coding then identified and coded pertinent features of the data giving equal priority  
29 over the whole dataset. These steps were independently conducted by two researchers (BES & FM)  
30 who met to compare codes and develop agreement on the grouping of codes into themes. The  
31 generated themes were reviewed and refined, ensuring that they explained the data in relation to  
32 the coded data, and the whole dataset. The researchers then consulted on the final two stages;  
33 themes and sub-themes were named and defined to demonstrate a clear narrative, using compelling  
34 extracts as illustrations. Consideration was given to each theme individually, but also to how they  
35 related to the dataset as a whole and other themes.<sup>[27]</sup>  
36  
37  
38  
39

40 Data were organised and analysed using QSR International's NVivo 11. After ten interviews, it was  
41 determined by the researchers that data saturation had occurred as no new thoughts or concepts  
42 were generated in the later interviews.  
43  
44  
45  
46  
47  
48  
49  
50  
51  
52  
53  
54  
55  
56  
57  
58  
59  
60

## Results

Participants ranged from 26 to 37 years of age (mean age 30.6), with a diagnosis of PFP for a mean duration of 78 months (range: 3 months to 16 years). For participants' characteristics see table 1. The interviews ranged from 13 to 43 minutes (mean time: 27 minutes).

**Table 1 Characteristics of participants**

| Participant Number | Gender | Age | Duration of symptoms (m) | Type of Employment |
|--------------------|--------|-----|--------------------------|--------------------|
| 1                  | F      | 26  | 60                       | Healthcare Worker  |
| 2                  | M      | 33  | 60                       | Builder            |
| 3                  | M      | 37  | 8                        | Office worker      |
| 4                  | F      | 26  | 192                      | Healthcare Worker  |
| 5                  | F      | 34  | 36                       | Office worker      |
| 6                  | F      | 27  | 84                       | Waitress           |
| 7                  | F      | 28  | 120                      | Technician         |
| 8                  | M      | 29  | 36                       | Office worker      |
| 9                  | F      | 36  | 3                        | Office worker      |
| 10                 | F      | 30  | 180                      | Office worker      |

F, female; M, male; m, months

The first theme that emerged from the data, impact on self, describes the participants' sense of loss, in relation to their self and self-identity. The further themes that emerged describe how the participants deal with this loss in a climate of uncertainty, how they understand or make decisions regarding exercise/activity and pain management, and how they prognosticate for the future. Data are presented to demonstrate the range and meaning to each theme.

### Theme 1: impact on self

Participants offered rich and detailed accounts of the impact and lived experience of PFP. Loss of self and loss of self-identity was evident in the stories told by many of the participants in this study. Self and self-identity are different concepts about ways in which individuals evaluate and interpret themselves; they are nested elements that are shaped by the contexts of individual's lives, with direct influence on decisions and behaviours.<sup>[30]</sup> Self, in its broader sense, can be defined as one's individuality and process of making sense of the world around them; it is a cognitive structure that defines one's sense of worth.<sup>[31]</sup> Self-identity, however, is the cognitive structure of internalised meanings and expectations associated with one's position and role within a social network.<sup>[32]</sup>

Symptoms affected all participants' daily life, with pain being a pervasive and disruptive feature of their day, with resulting loss of physical ability:

*"I struggle at work, bending down to get bottom shelf and getting back up, I literally have to hold onto the table to pull myself up. I can't do it off just my knees." [P7].*



---

“Yeah, well, it's a pain really because I'm walking around. I'm very stiff with that leg. Going up the stairs, down the stairs at work, getting out of a chair, getting into the car.” [P6].

Several participants described the negative impact of PFP on their mental well-being, with subsequent loss of self-identity:

“I would say the reason I got my horse was because I have mental health problems and so having a horse is my routine, structure, thing that I look forward to doing. The positive in my life. And having the knee problem makes that, makes that, not so effective. You can't do, what I imagined I would be able to do.” [P4].

Physical activity has been identified as a key quality of life domain, and the one most affected among patients with persistent pain.<sup>[33]</sup> Loss of activities for these participants included: walking; exercise; driving; holidays; time with family and friends; playing with children; duties at work and kneeling. These loss of activities directly affected participants' role and position within their social network, triggering feelings of loss of self-identity. For example, a number of participants explained how PFP affected their work, and made them question their career aspirations:

“I would say, it makes me like wonder, if I can do the job, not at this point but maybe when I get older and older, maybe I won't be able to do it”. [P4].

Judgemental attitudes from colleagues, friends or family, were described by a number of participants, with subsequent feelings of loss of self-identity, acting as moderators to low moods and feelings of premature ageing:

“They're saying that I'm a grandma. They say, 'Yeah. If you were a horse, they'd put you down (laughter). Just joking me, but obviously, it has affected me in the way that I've had to go out of work to go over to get physio. And I have had this time off, so I don't know if they're a bit, 'Well, it's not that bad.' Because day-to-day I try to be as normal as I can.” [P9].

Loss of significant relationships has emerged as a key aspect of loss in previous studies of patients with persistent pain,<sup>[34–36]</sup> and disruption to important and meaningful relationships was a strong and common theme found in patients with PFP. For example:

“I've missed out of things over the years, spending time with friends, spending time with family and that kind of thing, because I've not been able to do it.” [P6].

As identified by the above extracts, PFP had a compelling and far reaching impact on the participants and their lives. The pain and its disruption to life; loss of self-identity; and loss of relationships were themes that emerged from the data.

## **Theme 2: uncertainty, confusion and sense making**

Confusion and sense making formed a central part in the lives of the participants, with a strong desire from all to elucidate the cause of their pain.

1  
2  
3 *"If I could find out what it was that was causing the pain, then you hope it would be gone*  
4 *within a year. But because we don't really know what's caused it, it's kinda trial and error. So*  
5 *I don't really know."* [P1].  
6

7 The predominant focus of the participants' beliefs and attempts at making sense of their pain was  
8 that biomechanical factors were causative, with individuals trying to link these factors to the  
9 development and maintenance of their pain.  
10

11 *"My running technique or, I'm not sure. I'm not sure about that. I'm not sure. I think that's*  
12 *one thing, maybe something to do with the running technique, or something, or something*  
13 *to do with that."* [P8].  
14  
15

16 Furthermore, confusion was also related to the episodic nature of the symptoms, with participants  
17 attempting to relate 'flare-ups' to the same biomedical factors.  
18

19 A number of participants told stories of structural and biomedical beliefs becoming deep-rooted and  
20 established when reinforced. For example, one participant recounted multiple encounters with  
21 healthcare practitioners that influenced and reinforced her structural belief.  
22  
23

24 *"The work physio guy said to me that he thinks that my heels have maybe gone in which has*  
25 *then pulled my kneecap out of alignment. So instead of going smoothly over the joint where*  
26 *it's supposed to, that it's probably moving over the bone and that's the sharp pain that I'm*  
27 *feeling. Which did make sense because it, like I said, felt like I'd got a rock underneath my*  
28 *kneecap at some stage."* [P9].  
29  
30

31 Some participants remembered biomechanical focused diagnoses they had been given by a  
32 healthcare practitioner they had seen many years in the past; highlighting the power and lasting  
33 influence healthcare practitioners have on their patients. For example one participant remembered  
34 the diagnosis she had received from a healthcare practitioner over 10 years ago:  
35  
36

37 *"I had to go to the hospital once to have x-rays... I don't know if he [doctor] was trying to*  
38 *scare me into doing some exercise or something, but he basically said the only thing they*  
39 *could do is break both of my thighs and twist them a bit and then heal them back together.*  
40 *And it would take me years to get back to walking properly."* [P4].  
41  
42

43 Joint noises are a common feature of normal joint movement,<sup>[22]</sup> however participants commonly  
44 reported distress and confusion at joint noises, often finding healthcare practitioners' explanations  
45 inadequate.  
46

47 *"It was the noise that was concerning me more than the pain. I'm used to hurting. I'm too*  
48 *small to play rugby for a start, and I'd been fighting for 20 years, so, erm, it's one of those,*  
49 *you get used to the pain, but it's just the noise. When you start, you sort of [say] no, that's*  
50 *not right."* [P3].  
51  
52

53 This was in agreement with previous research, which identified negative emotions and inaccurate  
54 etiological beliefs with joint noises in patients with PFP.<sup>[37]</sup>  
55  
56  
57  
58  
59  
60

1  
2  
3 Expressly linked to participants' confusion and need to find the cause of their pain was also a strong  
4 desire to pursue radiological imaging, and feelings of not being taken fully seriously by the  
5 healthcare profession when this was not forthcoming.  
6

7 *"I want to know exactly what the problem is. Obviously, the doctor said, previously going*  
8 *back, they said tendonitis, and now they're saying it's runner's knee or whatever. But you*  
9 *know, it's still like, is that 100%, are you sure that's what it is? Because I was going to ask the*  
10 *doctor to send me for a MRI..." [P8].*  
11

12  
13 Previous research has linked poor outcomes with radiological imaging in populations with low back  
14 pain, suggesting an over use of imaging has a detrimental effect on outcomes.<sup>[38]</sup> There was one  
15 example of the resulting radiological findings compounding the confusion and distrust, for example  
16 Participant Six explained her feelings on a normal MRI finding as:  
17

18 *"I mean I was a bit concerned, because they didn't turn around and say, you have hurt it, but*  
19 *it's not major but this is what you've done, but they didn't actually, they said nothing's*  
20 *wrong, take the knee brace off, and carry on. [I was] almost deflated, because I was like*  
21 *wanting to know why it was hurting, but they weren't explaining any of that to me. So it's a*  
22 *bit like, difficult." [P6].*  
23  
24

25 Another participant's story demonstrates the negative impact of discordance between healthcare  
26 practitioners' diagnosis and advice, further compounding confusion and mistrust:  
27

28 *"Well, it makes you wonder then which one to believe, because I'm like, 'Well okay, he's told*  
29 *me not to do anything until I'm pain-free, because he doesn't want me to aggravate it,' but*  
30 *when, when I came here, and obviously they said that it would probably be best to start*  
31 *putting an impact on it again ... "* [P9].  
32  
33

34 The sense-making processes that participants described were established from past experience of  
35 healthcare treatment, past experience of pain and cultural beliefs around structure and pain.  
36

### 37 **Theme 3: exercise and activity beliefs**

  
38

39 All participants identified specific beliefs regarding barriers to exercise and activity. These were  
40 informed by factors relating to: diagnosis uncertainty; cultural beliefs around pain; fear-avoidant  
41 behaviours and the iatrogenic effect of healthcare.  
42

43 Diagnosis uncertainty, contributed to participants' beliefs regarding exercise and activity. In  
44 particular, it underpinned a dilemma regarding the relationship between activity and potential harm:  
45

46  
47 *"It's 'are you making it worse?' And that's the crux of it really. As I'm doing it and thinking, 'if*  
48 *this is hurting, should I really be doing this, or shall I pack this in and do something else?' But*  
49 *it's the not knowing ... "* [P5].  
50

51 Cultural beliefs around pain being a direct sign of tissue damage was evident in a large proportion of  
52 the participants' narratives, resulting in negative behaviour towards exercise and activity.  
53

54 *"...with me it's always been, if something hurt it because your body's telling you if you do*  
55 *that you're going to cause more injury. You'll make things worse." [P6].*  
56  
57  
58  
59  
60

1  
2  
3 Associated with the cultural beliefs on pain and damage was the resultant fear-avoidant behaviour.  
4 Participants, frequently contradicted themselves however; many participants would express the  
5 sentiment that they would not let the pain stop them from doing what they wanted to do, yet  
6 demonstrated clear activity withdrawal.  
7

8 *“So for example, we went to [holiday resort] last year; on your feet all day, walking miles and*  
9 *miles, I would be, like, in tears by the end of the day. I wouldn’t let it stop me the next day*  
10 *because I would be, like, I’m doing this” [P4].*  
11

12  
13 *“When I was in [holiday resort]; a couple of days I didn’t go out and I stayed back at the*  
14 *hotel. Because I couldn’t do it, I needed to rest.” [P4].*  
15

---

16  
17  
18  
19 A predominant sub-theme was the association of sport and exercise, even in the absence of pain, as  
20 a potential precursor to future joint pain and ‘damage’. Some participants attributed their current  
21 PFP to past sporting activities, despite no obvious mechanisms of injury.  
22

23 *“Yeah. Obviously it stems from doing long distance running.” [P7].*  
24

25 A number of participants discussed the direct impact of healthcare practitioner’s advice and  
26 diagnosis labelling on their exercise and activity levels, suggesting an iatrogenic effect of healthcare  
27 for PFP patients.  
28

29 *“I have been told by doctors before I shouldn’t run because it would jar my knee and*  
30 *shouldn’t run or walk on an uneven surface because it will wonk my knee from side to side.”*  
31 *[P4].*  
32

---

33  
34  
35  
36 *“But then when I started the physio at work and he told me that I shouldn’t walk or that I*  
37 *shouldn’t swim because he just wanted to obviously manipulate it and get me pain-free*  
38 *before I did anything that could possibly aggravate it. So I stopped.” [P9].*  
39

40 This theme identified a number of beliefs associated as a barrier to activity and exercise  
41 engagement. These included diagnosis uncertainty; cultural beliefs around pain; fear-avoidant  
42 behaviours and the iatrogenic effect of healthcare.  
43

#### 44 **Theme 4: behavioural coping strategies**

45  
46  
47 A central coping strategy for participants of this study was the concept of rest. Many of them  
48 associated rest, and avoidance of activity, with the idea that time was necessary for the healing  
49 process, and that aggravating activities should be avoided.  
50

51 *“I try, obviously, sit down as much as I can.” [P4].*  
52

53 One participant expressed an expectation that healthcare professionals would advise him not to  
54 continue with activity and exercise:  
55

56 **R:** *So you think physios would say no [to keep physically active]?*  
57  
58  
59

1  
2  
3 **P8:** *Physios would probably say no. Yeah, you shouldn't do it.*

4  
5 Another common coping strategy was postural adjustments; participants often talked of preferred  
6 sitting positions in relation to knee flexion.

7  
8 In keeping with previous research on the high levels of analgesic use in patients with PFP,<sup>[7]</sup> a  
9 common narrative shared with participants was the use of analgesics, with some acknowledging  
10 they were not effective.

11  
12 *"I have had some strong painkillers from the doctors. They gave me some naproxen and  
13 some codeine to manage it when it was at its worst but I try not to take them." [P9].*

14  
15 The use of knee supports was also common in the self-management strategies employed by the  
16 participants.

17  
18 *"If it hurts, it hurts. I'll try and strap my knee up. Because if I know I'm going harder in like  
19 gym classes, I'll strap my knees up before I go. And then when I get too much pain, I'll stop  
20 the exercise." [P10].*

## 21 22 23 24 **Theme 5: expectations of the future**

25 A number of participants expressed views, which could be contextualised as an external locus of  
26 control, with expectations of passive physiotherapeutic treatment options.

27  
28 *"I would presume manipulation of muscles groups, joints and tendons." [P3].*

29  
30 Even though the majority of participants expressed negative views about the future, they all  
31 expressed a desire to be pain free, over and above any functional improvements.

32  
33 **R:** *With the physio, what would you class as a success?*

34  
35 **P8:** *Getting rid of the pain.*

36  
37  
38 Nine of the ten participants held negative beliefs about the future; particularly in relation to  
39 prognostic prediction following their referral to physiotherapy.

40  
41 *"But then when I'm going up the stairs and it hurts it does concern me that it's going to be  
42 every day for the rest of my life I'm going to be struggling to walk upstairs. And then I think  
43 about getting old, and I think I'm going to end up with a stair lift and living downstairs and  
44 that sort of thing." [P1].*

45  
46  
47  
48 *"[the pain is] definitely preying on my mind. Is it gonna stop me from going into the police, is  
49 that gonna stop me doing the things I want to do later on in life? So yeah, it does prey on my  
50 mind a little bit." [P6].*

51  
52  
53 Central to their negative beliefs about the future and their prognosis was low self-efficacy.  
54 Participants felt they had very little control over their symptoms.

1  
2  
3 *"[In] my head, my thought process is I just hate it. Do an operation. Get rid of it. In my head,*  
4 *and obviously not being from the medical profession, but I'm just like, "Just get rid of the pain*  
5 *however it can be done." [P8].*  
6  
7

---

8  
9 *"Yes, I'm 37 now and they feel older than that. You just get that feeling, don't you, I've*  
10 *bounced back from lots of injuries before but this is the one that is making me think. You*  
11 *know, when this gets cold I can feel it, and thinking there's already arthritis there, I'm in*  
12 *trouble, it sets the brain going." [P3].*  
13  
14

---

15  
16  
17 Low expectation of physiotherapy, and past physiotherapy failed treatments were also a core theme  
18 within future expectations.

19  
20 **R:** *Have you got any expectations of what might happen when you walk in to see the physio?*

21  
22 **P10:** *I expect them to turn around and say physio can't help.*  
23

---

24  
25  
26 *"When I did get the physiotherapy it kinda didn't really do anything anyway. So it just made*  
27 *me think, it's pointless, 'cause they was trying to remove the fluid from out my knee, that like*  
28 *I say, made it worse to begin with. She did say your knees will feel sore, but it went back to*  
29 *how it was anyway, so, it just seemed like a pointless process." [P7].*  
30

31  
32 There was one exception, with one participant having positive outlook to the future and their  
33 physiotherapy referral.

34  
35 *"Oh yeah, I think it will get better. Yeah, I'd go for the better option." [P9].*  
36

37 The main sub-themes that emerged under the future were: beliefs that their pain will get worse;  
38 external locus of control with regards to treatment; low self-efficacy; poor opinion of physiotherapy  
39 and previous failed physiotherapy treatments and an overwhelming desire to be pain free, over and  
40 above any practical goals for rehabilitation.  
41

## 42 43 **Discussion**

### 44 45 **Main Findings**

46  
47 Quantitative research methodologies dominate the literature for PFP. This is the first study to use a  
48 qualitative method of inquiry to gain data on the experiences of people living with PFP. The five  
49 major themes that emerged from the data were: (1) impact on self; (2) uncertainty, confusion and  
50 sense making; (3) exercise and activity beliefs; (4) behavioural coping strategies and (5) expectations  
51 of the future.  
52

53  
54 A key finding of this study is that loss of physical ability is profound and considerable, and plays a  
55 significant role in participants' lives; despite previous research suggesting that PFP is a benign and  
56  
57  
58  
59

1  
2  
3 self-limiting condition.<sup>[5]</sup> An inability to continue with significant and meaningful activities has been  
4 identified as a cause of anxiety in people with persistent pain.<sup>[39]</sup> Persistent pain interrupts behaviour  
5 and a person's self-identity by affecting a sense of who they are, and what they might become.<sup>[40]</sup> As  
6 a result, lives are socially and environmentally restricted by persistent interruptions, or an inability  
7 to complete, or even attempt important tasks and activities.<sup>[40]</sup> With changes and loss of  
8 participants' position and role, for example with employment or family duties, the internalised  
9 meanings and expectations associated with one's self-identity is further threatened.<sup>[32]</sup>

10  
11  
12 Participants expressed intense confusion around their pain and symptoms. For instance, the  
13 causative reasons were elusive and troubling, as too was the ability to predict and control the pain  
14 intensity; and any attempts that participants made at understanding were firmly within the  
15 biomechanical sphere of reasoning. An inability to make sense of pain, and the process associated  
16 with sense-making and pain-related fear has been proposed in low back pain populations.<sup>[41]</sup>  
17 Previous research has identified that an inability to make sense of pain places 'lives on hold',<sup>[42]</sup> and  
18 may lead to more 'catastrophising'.<sup>[43]</sup>

19  
20  
21 There remains scientific debate and uncertainty around the underlying aetiology of PFP,<sup>[44]</sup> and there  
22 is a large variation in the way PFP is managed by physiotherapists in the UK.<sup>[45]</sup> The majority of  
23 participants in this study had previous experience of healthcare management for PFP suggesting that  
24 variation in healthcare treatment may have a negative impact on the patients' lived experience.  
25 Historically the biomedical model of pain establishes a direct relationship between tissue structure  
26 and pain,<sup>[46]</sup> and participants characteristically attributed their pain to structure and/or anatomical  
27 problems. However several studies have recently demonstrated that structural abnormalities of the  
28 patellofemoral joint on Magnetic Resonance Imaging (MRI) are not associated with PFP.<sup>[47,48]</sup> Three  
29 participants had no previous healthcare management for PFP, but nevertheless gave a  
30 biomechanical/structural cause for their pain; all three had previous physiotherapy for other pain  
31 conditions, including back, hips and ankles. This may suggest that exposure to biomechanical  
32 approaches to the management of musculoskeletal pain in general could, potentially, have a  
33 carryover to other locations of pain, with a negative effect.

34  
35  
36  
37 The iatrogenic effect of healthcare is an emerging field of research in the low back pain population  
38 <sup>[38,49]</sup>. This study is the first to find such a theme in patients with PFP. These findings are consistent  
39 with recent research that showed that the majority of UK physiotherapists would advise their  
40 patients not to continue with exercises if they experienced any pain.<sup>[45]</sup> The fear-avoidance model of  
41 pain is a well-established with patients with persistent pain, particularly persistent low back pain,<sup>[17]</sup>  
42 additionally research has shown that fear-avoidance behaviour may also exist with clinicians.<sup>[25,45,50]</sup>  
43 The central concept of the model is cognitions and emotions that underpin fear of the pain; fears  
44 about potential physical activities exacerbating the pain and further 'damaging' bodies. The fear  
45 leads to safety seeking behaviours and hypervigilance that paradoxically maintains or exacerbates  
46 the pain and disability.<sup>[22]</sup> In contrast, if pain is perceived in a non-threatening way patients are likely  
47 to maintain physical activity levels, through which recovery can be achieved.<sup>[51,52]</sup> All of the ten  
48 participants in this study described fear-avoidant behaviour at some stage of their interview. This is  
49 the first study, which we know of, that identifies this behaviour in patients with a diagnosis of PFP.

50  
51  
52  
53 Patellofemoral pain is often described as an 'overuse' injury,<sup>[53]</sup> and these data seem to be consistent  
54 with the patients' belief and behaviour with a definition more aligned with the English language  
55 meaning of 'overuse'. Contemporary thinking in relation to injury risk challenges the idea that PFP is  
56  
57  
58  
59

1  
2  
3 simply an 'overuse' injury, with evidence suggesting that persistent and long-term under-use may be  
4 a risk factor, with consistent exposure to tissue load being considered one method of  
5 management.<sup>[54]</sup> The fear-avoidant behaviours revealed within this study would therefore be seen  
6 as negative pain behaviour, with long-term detrimental consequences.  
7

8  
9 A key finding of this research is the low expectation for the future and low self-efficacy  
10 demonstrated by the majority of the participants that could be conceptualised as 'catastrophising'.  
11 Catastrophising is conceptually within the same model of pain behaviour as fear-avoidance, with  
12 largescale overlap.<sup>[19]</sup> Low self-efficacy, fear of the future and catastrophising is a common finding in  
13 patients with persistent pain.<sup>[24,55]</sup> The National Institute of Health and Care Excellence describes  
14 pain as a complex biopsychosocial issue, associated with expectations, self-efficacy, mood and  
15 coping abilities.<sup>[56]</sup> In addition, it has been shown that self-efficacy is a strong predictor of successful  
16 outcome, irrespective of the intervention delivered, for patients with persistent pain; suggesting  
17 that rehabilitation programmes for persistent musculoskeletal pain should be designed with the aim  
18 of improving self-efficacy.<sup>[57]</sup>  
19  
20

## 21 **Clinical and research implications**

22 This study established that a sample of patients with PFP demonstrated: pain-related fear, such as  
23 fear-avoidance; damage beliefs; difficulty with making sense of their pain; low self-efficacy and fear  
24 of the future.  
25  
26

27 The current consensus that best evidence treatments consisting of hip and knee strengthening may  
28 not be adequate to address the fears and beliefs identified in the current study. Future studies are  
29 needed to explore biopsychosocial targeted interventions for this population, particularly in relation  
30 to pain experienced by patients during exercise, followed by efficacy and effectiveness trials.  
31 Interventions may be patient education packages and self-management strategies targeting self-  
32 efficacy and physical activity. Furthermore, future qualitative work will be beneficial to understand  
33 the role of medical terminology commonly used with this patient group, for example, 'weakness'  
34 and 'patellar mal-tracking',<sup>[45]</sup> and its impact and interpretation by patients.  
35  
36  
37

## 38 **Study limitations and strengths**

39 Two authors independently coded all transcripts, and this study employed a clear, transparent and  
40 reproducible methodological approach to data analysis. The authors make it clear that their clinical  
41 and research experience lie within the biopsychosocial framework of musculoskeletal pain and this  
42 study forms part of a larger body of research looking at pain education, self-management strategies  
43 and exercise interventions for individuals with PFP.<sup>[58]</sup> It is worth noting that the interviewer made it  
44 explicit to the participants that he was a physiotherapist; indeed a number of them did proceed to  
45 ask clinical questions about their condition, highlighting a power dynamic between the interviewer  
46 and participant. This may, in part, have influenced their responses.  
47  
48  
49

50 The main limitation of this study is that for pragmatic reasons a convenience sampling technique  
51 was used. It is possible that this sample may differ from other samples within the UK, and how  
52 representative these findings are to the greater population of individuals with PFP is unknown. A  
53 purposive sampling technique may have better represented sociodemographic groups, or targeted  
54 identifiable subgroups.  
55  
56  
57  
58  
59



## Conclusion

These findings offer an insight into the lived experience of individuals with PFP. Previous literature have focused on pain and biomechanics, rather than the individual experience, attached meanings and any wider context within a sociocultural perspective. The participants provided rich and detailed narratives of loss of physical and functional ability; loss of self-identity; pain related confusion and difficulty making sense of their pain; pain-related fear, including fear-avoidance and 'damage' beliefs; inappropriate coping strategies and fear of the future. Our findings suggest future research is warranted into biopsychosocial targeted interventions and the impact and interpretation of medical terminology.

## Authors' contributions

BES was responsible for conception and design, compiling the interview schedule, interviewing, transcribing, coding, analysis and interpretation, drafting and revising the manuscript. FM was responsible for conception and design, compiling the interview schedule, coding, analysis and interpretation, drafting and revising the manuscript. PH, MB, JS, MR, TS and PL were involved in conception and design, interpretation and reviewing revisions to the manuscript. All authors have read and approved of the final manuscript.

## Funding

This report is independent research arising from a Clinical Doctoral Research Fellowship, Benjamin Smith, ICA-CDRF-2015-01-002 supported by the National Institute for Health Research (NIHR) and Health Education England (HEE). The views expressed in this publication are those of the author(s) and not necessarily those of the NHS, the NIHR, HEE or the Department of Health.

## Competing interests

The authors declare that they have no competing interests.

## Ethics approval

This study was approved by the West Midlands - Black Country Research Ethics Committee (16/WM/0414).

## Availability of data

Quotations and further details are available from Benjamin Smith at [benjamin.smith3@nhs.net](mailto:benjamin.smith3@nhs.net)

## References

- 1 Dey P, Callaghan M, Cook N, *et al.* A questionnaire to identify patellofemoral pain in the community: an exploration of measurement properties. *BMC Musculoskelet Disord* 2016;17:237. doi:10.1186/s12891-016-1097-5
- 2 Urwin M, Symmons D, Allison T, *et al.* Estimating the burden of musculoskeletal disorders in the community: the comparative prevalence of symptoms at different anatomical sites, and the relation to social deprivation. *Ann Rheum Dis* 1998;57:649–55.
- 3 Jordan KP, Kadam UT, Hayward R, *et al.* Annual consultation prevalence of regional musculoskeletal problems in primary care: an observational study. *BMC Musculoskelet Disord* 2010;11:144. doi:10.1186/1471-2474-11-144
- 4 Crossley KM, Stefanik JJ, Selfe J, *et al.* 2016 Patellofemoral pain consensus statement from the 4th International Patellofemoral Pain Research Retreat, Manchester. Part 1: Terminology, definitions, clinical examination, natural history, patellofemoral osteoarthritis and patient-reported outcome m. *Br J Sports Med* 2016;50:839–43.
- 5 Sandow MJ, Goodfellow JW. The natural history of anterior knee pain in adolescents. *J Bone Joint Surg Br* 1985;67:36–8.
- 6 Collins NJ, Bierma-Zeinstra SMA, Crossley KM, *et al.* Prognostic factors for patellofemoral pain: a multicentre observational analysis. *Br J Sports Med* 2013;47:227–33. doi:10.1136/bjsports-2012-091696
- 7 Stathopulu E, Baildam E. Anterior knee pain: a long-term follow-up. *Rheumatology (Oxford)* 2003;42:380–2.
- 8 Rathleff MS, Rasmussen S, Olesen JL. Unsatisfactory long-term prognosis of conservative treatment of patellofemoral pain syndrome. *Ugeskr Laeger* 2012;174:1008–13.
- 9 Smith BE, Hendrick P, Logan P. Patellofemoral pain: Challenging current practice - A case report. *Man Ther* 2016;22:216–9. doi:10.1016/j.math.2015.09.002
- 10 Doménech J, Sanchis-Alfonso V, López L, *et al.* Influence of kinesiophobia and catastrophizing on pain and disability in anterior knee pain patients. *Knee Surgery, Sport Traumatol Arthrosc* 2013;21:1562–8. doi:10.1007/s00167-012-2238-5
- 11 Piva SR, Fitzgerald GK, Wisniewski S, *et al.* Predictors of pain and function outcome after rehabilitation in patients with patellofemoral pain syndrome. *J Rehabil Med* 2009;41:604–12. doi:10.2340/16501977-0372

- 1  
2  
3 12 Piva SR, Fitzgerald GK, Irrgang JJ, *et al.* Associates of Physical Function and Pain in Patients  
4 with Patellofemoral Pain Syndrome. *Arch Phys Med Rehabil* 2009;90:285–95.  
5 doi:10.1016/j.apmr.2008.08.214  
6  
7  
8 13 Quartana PJ, Campbell CM, Edwards RR. Pain catastrophizing: a critical review. *Expert Rev*  
9 *Neurother* 2009;9:745–58. doi:10.1586/ern.09.34  
10  
11  
12 14 Moseley GL, Arntz A. The context of a noxious stimulus affects the pain it evokes. *PAIN*<sup>®</sup>  
13 2007;133:64–71.  
14  
15  
16 15 Harvie DS, Broecker M, Smith RT, *et al.* Bogus visual feedback alters onset of movement-  
17 evoked pain in people with neck pain. *Psychol Sci* 2015;:0956797614563339.  
18  
19  
20 16 Lobanov O V, Zeidan F, McHaffie JG, *et al.* From cue to meaning: Brain mechanisms  
21 supporting the construction of expectations of pain. *PAIN*<sup>®</sup> 2014;155:129–36.  
22  
23  
24 17 Chou R, Shekelle P. Will this patient develop persistent disabling low back pain? *JAMA*  
25 2010;303:1295–302. doi:10.1001/jama.2010.344  
26  
27  
28 18 Mallows A, Debenham J, Walker T, *et al.* Association of psychological variables and outcome  
29 in tendinopathy: a systematic review. *Br J Sports Med* 2016;:bjsports – 2016.  
30  
31  
32 19 Wertli MM, Rasmussen-Barr E, Weiser S, *et al.* The role of fear avoidance beliefs as a  
33 prognostic factor for outcome in patients with nonspecific low back pain: a systematic  
34 review. *spine J* 2014;14:816–36.  
35  
36  
37 20 Osborn M, Smith JA. The personal experience of chronic benign lower back pain: An  
38 interpretative phenomenological analysis. *Br J Pain* 2015;9:65–83.  
39  
40  
41 21 Smith JA, Osborn M. Pain as an assault on the self: An interpretative phenomenological  
42 analysis of the psychological impact of chronic benign low back pain. *Psychol Heal*  
43 2007;22:517–34.  
44  
45  
46 22 Jones S, Hanchard N, Hamilton S, *et al.* A qualitative study of patients' perceptions and  
47 priorities when living with primary frozen shoulder. *BMJ Open* 2013;3:e003452.  
48  
49  
50 23 Walker J, Holloway I, Sofaer B. In the system: the lived experience of chronic back pain from  
51 the perspectives of those seeking help from pain clinics. *Pain* 1999;80:621–8.  
52  
53  
54 24 Walker J, Sofaer B, Holloway I. The experience of chronic back pain: accounts of loss in those  
55 seeking help from pain clinics. *Eur J Pain* 2006;10:199.  
56  
57  
58  
59

- 1  
2  
3 25 Nijs J, Roussel N, Paul van Wilgen C, *et al.* Thinking beyond muscles and joints: Therapists' and patients' attitudes and beliefs regarding chronic musculoskeletal pain are key to applying effective treatment. *Man Ther* 2013;18:96–102.  
4  
5  
6  
7  
8 26 Thorne S, Kirkham SR, MacDonald-Emes J. Focus on qualitative methods. Interpretive description: a noncategorical qualitative alternative for developing nursing knowledge. *Res Nurs Health* 1997;20:169–77.  
9  
10  
11  
12  
13 27 Braun V, Clarke V. Using thematic analysis in psychology. *Qual Res Psychol* 2006;3:77–101.  
14  
15  
16 28 Tong A, Sainsbury P, Craig J. Consolidated criteria for reporting qualitative research (COREQ): a 32-item checklist for interviews and focus groups. *Int J Qual Heal care* 2007;19:349–57.  
17  
18  
19 29 Mc Auliffe S, Synott A, Casey H, *et al.* Beyond the tendon: Experiences and perceptions of people with persistent Achilles tendinopathy. *Musculoskelet Sci Pract* 2017;29:108–14.  
20  
21  
22  
23 30 Leary MR, Tangney JP. *Handbook of self and identity*. Guilford Press 2011.  
24  
25  
26 31 Baumeister RF. *The self in social psychology*. 1999.  
27  
28  
29 32 Stryker S, Burke PJ. The past, present, and future of an identity theory. *Soc Psychol Q* 2000;:284–97.  
30  
31  
32  
33 33 Lamé IE, Peters ML, Vlaeyen JWS, *et al.* Quality of life in chronic pain is more associated with beliefs about pain, than with pain intensity. *Eur J Pain* 2005;9:15–24.  
34  
35  
36  
37 34 Aldrich S, Eccleston C. Making sense of everyday pain. *Soc Sci Med* 2000;50:1631–41.  
38  
39  
40 35 Charmaz K. From the 'sick role' to stories of self: Understanding the self in illness. *Rutgers Ser Self Soc Identity* 1999;2:209–39.  
41  
42  
43  
44 36 Johansson EE, Hamberg K, Westman G, *et al.* The meanings of pain: an exploration of women's descriptions of symptoms. *Soc Sci Med* 1999;48:1791–802.  
45  
46  
47  
48 37 Robertson CJ, Hurley M, Jones F. People's beliefs about the meaning of crepitus in patellofemoral pain and the impact of these beliefs on their behaviour: A qualitative study. *Musculoskelet Sci Pract* 2017;28:59–64. doi:10.1016/j.msksp.2017.01.012  
49  
50  
51  
52 38 Webster BS, Bauer AZ, Choi Y, *et al.* Iatrogenic consequences of early magnetic resonance imaging in acute, work-related, disabling low back pain. *Spine (Phila Pa 1976)* 2013;38:1939–46.  
53  
54  
55  
56  
57  
58  
59  
60

- 1  
2  
3 39 Roy R. *Chronic pain, loss and suffering*. University of Toronto Press 2004.  
4  
5  
6 40 Harris S, Morley S, Barton SB. Role loss and emotional adjustment in chronic pain. *Pain*  
7 2003;105:363–70.  
8  
9  
10 41 Bunzli S, Smith A, Schütze R, *et al*. Beliefs underlying pain-related fear and how they evolve: a  
11 qualitative investigation in people with chronic back pain and high pain-related fear. *BMJ*  
12 *Open* 2015;5.  
13  
14  
15 42 Bunzli S, Watkins R, Smith A, *et al*. Lives on hold: a qualitative synthesis exploring the  
16 experience of chronic low-back pain. *Clin J Pain* 2013;29:907–16.  
17  
18  
19 43 van Wilgen CP, van Ittersum MW, Kaptein AA, *et al*. Illness perceptions in patients with  
20 fibromyalgia and their relationship to quality of life and catastrophizing. *Arthritis Rheum*  
21 2008;58:3618–26.  
22  
23  
24 44 Doménech J, Sanchis-Alfonso V, Espejo BBB, *et al*. Changes in catastrophizing and  
25 kinesiophobia are predictive of changes in disability and pain after treatment in patients with  
26 anterior knee pain. *Knee Surg Sports Traumatol Arthrosc* 2014;22:2295–300.  
27 doi:10.1007/s00167-014-2968-7  
28  
29  
30 45 Smith BE, Hendrick P, Bateman M, *et al*. Current Management Strategies for Patellofemoral  
31 Pain: An online survey of 99 practising UK physiotherapists. *BioMed Cent Musculoskelet*  
32 *Disord* 2017;18. doi:10.1186/s12891-017-1539-8  
33  
34  
35 46 Doménech J, Sanchis-Alfonso V, Espejo B. Influence of Psychological Factors on Pain and  
36 Disability in Anterior Knee Pain Patients. In: *Anterior Knee Pain and Patellar Instability*.  
37 London: : Springer London 2011. 123–35. doi:10.1007/978-0-85729-507-1\_9  
38  
39  
40 47 van der Heijden RA, Oei EHG, Bron EE, *et al*. No Difference on Quantitative Magnetic  
41 Resonance Imaging in Patellofemoral Cartilage Composition Between Patients With  
42 Patellofemoral Pain and Healthy Controls. *Am J Sports Med* 2016;44:1172–8.  
43 doi:10.1177/0363546516632507  
44  
45  
46 48 van der Heijden RA, de Kanter JLM, Bierma-Zeinstra SMA, *et al*. Structural Abnormalities on  
47 Magnetic Resonance Imaging in Patients With Patellofemoral Pain: A Cross-sectional Case-  
48 Control Study. *Am J Sports Med* 2016;44:2339–46. doi:10.1177/0363546516646107  
49  
50  
51 49 Lin IB, O’Sullivan PB, Coffin JA, *et al*. Disabling chronic low back pain as an iatrogenic disorder:  
52 a qualitative study in Aboriginal Australians. *BMJ Open* 2013;3:1–8.  
53  
54  
55 50 Littlewood C, Lowe A, Moore J. Rotator cuff disorders: a survey of current UK physiotherapy  
56 practice. *Shoulder Elb* 2012;4:64–71. doi:10.1111/j.1758-5740.2011.00164.x  
57  
58  
59

- 1  
2  
3 51 Leeuw M, Goossens MEJB, Linton SJ, *et al.* The fear-avoidance model of musculoskeletal pain:  
4 current state of scientific evidence. *J Behav Med* 2007;30:77–94. doi:10.1007/s10865-006-  
5 9085-0  
6  
7  
8 52 Vlaeyen JW, Linton SJ. Fear-avoidance and its consequences in chronic musculoskeletal pain:  
9 a state of the art. *Pain* 2000;85:317–32.  
10  
11  
12 53 Herrington L, Nester C. Q-angle undervalued? The relationship between Q-angle and medio-  
13 lateral position of the patella. *Clin Biomech (Bristol, Avon)* 2004;19:1070–3.  
14 doi:10.1016/j.clinbiomech.2004.07.010  
15  
16  
17 54 Gabbett TJ. The training-injury prevention paradox: should athletes be training smarter and  
18 harder? *Br J Sports Med* 2016;50:273–80. doi:10.1136/bjsports-2015-095788  
19  
20  
21 55 Arnstein P, Caudill M, Mandle CL, *et al.* Self efficacy as a mediator of the relationship between  
22 pain intensity, disability and depression in chronic pain patients. *Pain* 1999;80:483–91.  
23  
24  
25 56 National Institute for Clinical Excellence. Osteoarthritis: care and management. 2014.  
26  
27  
28 57 Miles CL, Pincus T, Carnes D, *et al.* Can we identify how programmes aimed at promoting self-  
29 management in musculoskeletal pain work and who benefits? A systematic review of sub-  
30 group analysis within RCTs. *Eur J Pain* 2011;15. doi:10.1016/j.ejpain.2011.01.016  
31  
32  
33 58 Smith BE, Hendrick P, Bateman M, *et al.* Study protocol: a mixed methods feasibility study for  
34 a loaded self-managed exercise programme for patellofemoral pain. *Pilot Feasibility Stud*  
35 2017;4. doi:10.1186/s40814-017-0167-2  
36  
37  
38  
39  
40  
41  
42  
43  
44  
45  
46  
47  
48  
49  
50  
51  
52  
53  
54  
55  
56  
57  
58  
59  
60

## Consolidated criteria for reporting qualitative studies (COREQ): 32-item checklist

Developed from:

Tong A, Sainsbury P, Craig J. Consolidated criteria for reporting qualitative research (COREQ): a 32-item checklist for interviews and focus groups. *International Journal for Quality in Health Care*. 2007. Volume 19, Number 6: pp. 349 – 357

**YOU MUST PROVIDE A RESPONSE FOR ALL ITEMS. ENTER N/A IF NOT APPLICABLE**

| No. Item                                       | Guide questions/description                                                                                                                              | Reported on Page # |
|------------------------------------------------|----------------------------------------------------------------------------------------------------------------------------------------------------------|--------------------|
| <b>Domain 1: Research team and reflexivity</b> |                                                                                                                                                          |                    |
| <i>Personal Characteristics</i>                |                                                                                                                                                          |                    |
| 1. Interviewer/facilitator                     | Which author/s conducted the interview or focus group?                                                                                                   | Page 5             |
| 2. Credentials                                 | What were the researcher's credentials?<br>E.g. PhD, MD                                                                                                  | Page 5             |
| 3. Occupation                                  | What was their occupation at the time of the study?                                                                                                      | Page 5             |
| 4. Gender                                      | Was the researcher male or female?                                                                                                                       | Page 5             |
| 5. Experience and training                     | What experience or training did the researcher have?                                                                                                     | Page 5             |
| <i>Relationship with participants</i>          |                                                                                                                                                          |                    |
| 6. Relationship established                    | Was a relationship established prior to study commencement?                                                                                              | Page 5             |
| 7. Participant knowledge of the interviewer    | What did the participants know about the researcher? e.g. personal goals, reasons for doing the research                                                 | Page 5             |
| 8. Interviewer characteristics                 | What characteristics were reported about the interviewer/facilitator? e.g. Bias, assumptions, reasons and interests in the research topic                | Page 5 & 15        |
| <b>Domain 2: study design</b>                  |                                                                                                                                                          |                    |
| <i>Theoretical framework</i>                   |                                                                                                                                                          |                    |
| 9. Methodological orientation and Theory       | What methodological orientation was stated to underpin the study? e.g. grounded theory, discourse analysis, ethnography, phenomenology, content analysis | Page 5             |
| <i>Participant selection</i>                   |                                                                                                                                                          |                    |
| 10. Sampling                                   | How were participants selected? e.g. purposive, convenience, consecutive, snowball                                                                       | Page 5             |
| 11. Method of approach                         | How were participants approached? e.g. face-to-face, telephone, mail, email                                                                              | Page 5             |
| 12. Sample size                                | How many participants were in the study?                                                                                                                 | Page 5             |

|                                        |                                                                                                                                 |            |
|----------------------------------------|---------------------------------------------------------------------------------------------------------------------------------|------------|
| 13. Non-participation                  | How many people refused to participate or dropped out? Reasons?                                                                 | Page 5     |
| <i>Setting</i>                         |                                                                                                                                 |            |
| 14. Setting of data collection         | Where was the data collected? e.g. home, clinic, workplace                                                                      | Page 5     |
| 15. Presence of non-participants       | Was anyone else present besides the participants and researchers?                                                               | Page 5     |
| 16. Description of sample              | What are the important characteristics of the sample? e.g. demographic data, date                                               | Page 7     |
| <i>Data collection</i>                 |                                                                                                                                 |            |
| 17. Interview guide                    | Were questions, prompts, guides provided by the authors? Was it pilot tested?                                                   | Page 5     |
| 18. Repeat interviews                  | Were repeat inter views carried out? If yes, how many?                                                                          | N/A        |
| 19. Audio/visual recording             | Did the research use audio or visual recording to collect the data?                                                             | Page 5     |
| 20. Field notes                        | Were field notes made during and/or after the inter view or focus group?                                                        | Page 5 & 6 |
| 21. Duration                           | What was the duration of the inter views or focus group?                                                                        | Page 7     |
| 22. Data saturation                    | Was data saturation discussed?                                                                                                  | Page 6     |
| 23. Transcripts returned               | Were transcripts returned to participants for comment and/or correction?                                                        | N/A        |
| <b>Domain 3: analysis and findings</b> |                                                                                                                                 |            |
| <i>Data analysis</i>                   |                                                                                                                                 |            |
| 24. Number of data coders              | How many data coders coded the data?                                                                                            | Page 6     |
| 25. Description of the coding tree     | Did authors provide a description of the coding tree?                                                                           | N/A        |
| 26. Derivation of themes               | Were themes identified in advance or derived from the data?                                                                     | Page 6     |
| 27. Software                           | What software, if applicable, was used to manage the data?                                                                      | NVivo      |
| 28. Participant checking               | Did participants provide feedback on the findings?                                                                              | NO         |
| <i>Reporting</i>                       |                                                                                                                                 |            |
| 29. Quotations presented               | Were participant quotations presented to illustrate the themes/findings? Was each quotation identified? e.g. participant number | Results    |
| 30. Data and findings consistent       | Was there consistency between the data presented and the findings?                                                              | Page 13    |
| 31. Clarity of major themes            | Were major themes clearly presented in the findings?                                                                            | RESULTS    |
| 32. Clarity of minor themes            | Is there a description of diverse cases or discussion of minor themes?                                                          | Discussion |

**Once you have completed this checklist, please save a copy and upload it as part of your submission. When requested to do so as part of the upload process, please select the file type: *Checklist*. You will NOT be able to proceed with**



1  
2  
3  
4  
5  
6  
7  
8  
9  
10  
11  
12  
13  
14  
15  
16  
17  
18  
19  
20  
21  
22  
23  
24  
25  
26  
27  
28  
29  
30  
31  
32  
33  
34  
35  
36  
37  
38  
39  
40  
41  
42  
43  
44  
45  
46  
47  
48  
49  
50  
51  
52  
53  
54  
55  
56  
57  
58  
59  
60

**submission unless the checklist has been uploaded. Please DO NOT include this checklist as part of the main manuscript document. It must be uploaded as a separate file.**

For peer review only

# BMJ Open

## The experience of living with patellofemoral pain: loss, confusion and fear-avoidance – a UK qualitative study

|                                 |                                                                                                                                                                                                                                                                                                                                                                                                                                                                                                                                                                                                                                                                                                                                                                                                                                                                                                                                                                                                                                                                               |
|---------------------------------|-------------------------------------------------------------------------------------------------------------------------------------------------------------------------------------------------------------------------------------------------------------------------------------------------------------------------------------------------------------------------------------------------------------------------------------------------------------------------------------------------------------------------------------------------------------------------------------------------------------------------------------------------------------------------------------------------------------------------------------------------------------------------------------------------------------------------------------------------------------------------------------------------------------------------------------------------------------------------------------------------------------------------------------------------------------------------------|
| Journal:                        | <i>BMJ Open</i>                                                                                                                                                                                                                                                                                                                                                                                                                                                                                                                                                                                                                                                                                                                                                                                                                                                                                                                                                                                                                                                               |
| Manuscript ID                   | bmjopen-2017-018624.R2                                                                                                                                                                                                                                                                                                                                                                                                                                                                                                                                                                                                                                                                                                                                                                                                                                                                                                                                                                                                                                                        |
| Article Type:                   | Research                                                                                                                                                                                                                                                                                                                                                                                                                                                                                                                                                                                                                                                                                                                                                                                                                                                                                                                                                                                                                                                                      |
| Date Submitted by the Author:   | 16-Nov-2017                                                                                                                                                                                                                                                                                                                                                                                                                                                                                                                                                                                                                                                                                                                                                                                                                                                                                                                                                                                                                                                                   |
| Complete List of Authors:       | Smith, Benjamin; Derby Teaching Hospitals NHS Foundation Trust, Physiotherapy Outpatients; University of Nottingham, Division of Rehabilitation and Ageing, School of Medicine<br>Moffatt, Fiona; University of Nottingham, Division of Physiotherapy and Rehabilitation Sciences, School of Health Sciences,<br>Hendrick, Paul ; University of Nottingham, Division of Physiotherapy and Rehabilitation Sciences, School of Health Sciences<br>Bateman, Marcus; Derby Teaching Hospitals NHS Foundation Trust, Physiotherapy Outpatients<br>Rathleff, Michael ; Aalborg University, Research Unit for General Practice in Aalborg, Department of Clinical Medicine ; Aalborg University Hospital, Department of Occupational Therapy and Physiotherapy, Department of Clinical Medicine<br>Selfe, James; Manchester Metropolitan University, Department of Health Professions<br>Smith, Toby O.; University of East Anglia, Faculty of Medicine and Health Sciences<br>Logan, Phillipa; University of Nottingham , Division of Rehabilitation and Ageing, School of Medicine |
| <b>Primary Subject Heading</b>: | Qualitative research                                                                                                                                                                                                                                                                                                                                                                                                                                                                                                                                                                                                                                                                                                                                                                                                                                                                                                                                                                                                                                                          |
| Secondary Subject Heading:      | Rehabilitation medicine, Sports and exercise medicine                                                                                                                                                                                                                                                                                                                                                                                                                                                                                                                                                                                                                                                                                                                                                                                                                                                                                                                                                                                                                         |
| Keywords:                       | patellofemoral pain, anterior knee pain, PFP                                                                                                                                                                                                                                                                                                                                                                                                                                                                                                                                                                                                                                                                                                                                                                                                                                                                                                                                                                                                                                  |
|                                 |                                                                                                                                                                                                                                                                                                                                                                                                                                                                                                                                                                                                                                                                                                                                                                                                                                                                                                                                                                                                                                                                               |

SCHOLARONE™  
Manuscripts

## **The experience of living with patellofemoral pain: loss, confusion and fear-avoidance – a UK qualitative study**

Benjamin E Smith<sup>1,2,\*</sup>, Fiona Moffatt<sup>3</sup>, Paul Hendrick<sup>3</sup>, Marcus Bateman<sup>1</sup>, Michael Skovdal Rathleff<sup>4,5</sup>, James Selfe<sup>6</sup>, Toby O Smith<sup>7</sup>, Pip Logan<sup>2</sup>

<sup>1</sup>Derby Teaching Hospitals NHS Foundation Trust, Physiotherapy Department (Level 3), London Road Community Hospital, Derby DE1 2QY, UK

<sup>2</sup>Division of Rehabilitation and Ageing, School of Medicine, University of Nottingham, Nottingham, UK

<sup>3</sup>Division of Physiotherapy and Rehabilitation Sciences, School of Health Sciences, University of Nottingham, Nottingham University Hospitals (City Campus), Nottingham, UK.

<sup>4</sup>Research Unit for General Practice in Aalborg, Department of Clinical Medicine at Aalborg University, Aalborg, Denmark

<sup>5</sup>Department of Occupational Therapy and Physiotherapy, Department of Clinical Medicine, Aalborg University Hospital, Denmark

<sup>6</sup>Department of Health Professions, Manchester Metropolitan University, Manchester, UK

<sup>7</sup>Faculty of Medicine and Health Sciences, University of East Anglia, Norwich, UK

\*Corresponding author. Tel: 01332 254631 Email: [benjamin.smith3@nhs.net](mailto:benjamin.smith3@nhs.net)

## Abstract

### Objectives:

To investigate the experience of living with patellofemoral pain.

### Design:

Qualitative study design using semi-structured interviews, and analysed thematically using the guidelines set out by Braun and Clarke.

### Setting:

A National Health Service (NHS) physiotherapy clinic within a large UK teaching hospital.

### Participants:

A convenience sample of ten participants, aged between 18 and 40, with a diagnosis of patellofemoral pain and on a physiotherapy waiting list, prior to starting physiotherapy.

### Results:

Participants offered rich and detailed accounts of the impact and lived experience of patellofemoral pain, including: loss of physical and functional ability; loss of self-identity; pain related confusion and difficulty making sense of their pain; pain related fear, including fear-avoidance and 'damage' beliefs; inappropriate coping strategies and fear of the future. The five major themes that emerged from the data were: (1) impact on self; (2) uncertainty, confusion and sense making; (3) exercise and activity beliefs; (4) behavioural coping strategies and (5) expectations of the future.

### Conclusions:

These findings offer an insight into the lived experience of individuals with patellofemoral pain. Previous literature has focused on pain and biomechanics, rather than the individual experience, attached meanings and any wider context within a sociocultural perspective. Our findings suggest future research is warranted into biopsychosocial targeted interventions aimed at the beliefs and pain related fear for people with patellofemoral pain. The current consensus that best-evidence treatments consisting of hip and knee strengthening may not be adequate to address the fears and beliefs identified in the current study. Further qualitative research may be warranted on the impact and interpretation of medical terminology commonly used with this patient group, for example, 'weakness' and 'patellar mal-tracking' and its impact and interpretation by patients.

### Trial registration:

ISRCTN 35272486

## Article Summary

### Strengths and limitations of this study:

- This is the first study to use a qualitative method of inquiry on the experience of people living with patellofemoral pain.
- Two authors independently coded all transcripts, and a clear, transparent and reproducible methodological approach was used in the thematic analysis.
- For pragmatic reasons a convenience sampling technique was used.

## Introduction

Patellofemoral pain (PFP) is one of the most common and costly forms of knee pain.<sup>[1-3]</sup> It has an estimated prevalence of 23% in the general population in the UK.<sup>[1]</sup> Symptoms typically include retro-patellar or diffuse peripatellar pain, aggravated by activities that load the joint, such as climbing and descending stairs, squatting and running.<sup>[4]</sup>

Historically PFP has been labelled a “benign, self-limiting condition”, that improves over time with little intervention indicated.<sup>[5]</sup> However, this belief has recently been challenged with data suggesting that the overall long-term prognosis for the majority of patients with PFP is poor.<sup>[6]</sup> Only one third of patients are pain-free one year after diagnosis,<sup>[6]</sup> and 91% still report pain and dysfunction four years post-diagnosis.<sup>[7]</sup> Quantitative data suggests that some patients withdraw from participation in physical activities,<sup>[8,9]</sup> and may develop associated psychological distress, such as fear-avoidance and catastrophising thoughts in relation to their knee pain.<sup>[10-12]</sup>

The biopsychosocial model of persistent pain has recognised that psychological factors, such as fear and catastrophising can, through changes to behaviour, modulate physiological responses to pain with the development and maintenance of persistent pain.<sup>[13-17]</sup> Psychological distress has been identified in low back pain and tendon pain populations through systematic reviews,<sup>[18,19]</sup> and qualitative methods in low back and shoulder populations,<sup>[20-22]</sup> however to our knowledge this has not been investigated in PFP. Advocates of qualitative research methods suggest that qualitative inquiry can disclose the experience of people with pain, and therefore be used to understand patient motivation, social engagement and provide a wealth of information about the sociocultural context to pain.<sup>[23,24]</sup> Contemporary models of persistent pain have identified the importance of thinking beyond muscles and joints,<sup>[25]</sup> and qualitative inquiry can provide an insight that may lead to development of ideas and hypothesis generation within the context of the biopsychosocial model of pain. No study using qualitative methods has been published regarding PFP. Therefore the aim of this study was to give a more detailed account of the experience of people living with PFP, seeking secondary care within the UK.

## Method

In order to address gaps in the literature this research focused on identifying themes within the participants' experience of living with PFP. A qualitative interpretive description design was chosen as an appropriate methodological approach.<sup>[26]</sup> Thematic analysis is the most appropriate method for this type of inquiry, as codes and themes can be created inductively to capture meaning and content without prior preconceptions allowing flexibility to generate a rich and detailed account of the data.<sup>[27]</sup>

In this study, data were analysed thematically using the guidelines set out by Braun and Clarke,<sup>[27]</sup> and was reported in line with the COnsolidated criteria for REporting Qualitative research (COREQ) checklist (see supplementary file 1).<sup>[28]</sup>

Braun and Clarke<sup>[27]</sup> describe a multi-stage approach to thematic data analysis; demonstrating clear distinction of the thematic approach, whilst allowing for the inherent flexibility in the process. They reasoned that a thematic analysis can be conducted from a both realist and constructionist paradigms, although with differing outcomes. A realist approach allows theories about individual motivation and meaning to be developed, since the epistemological position is that there is a unidirectional relationship between meaning, experience and language<sup>[27]</sup>. A constructionist perspective differs, as meaning and experience are socially produced and knowledge a human and social construct; therefore theories about individual motivation and meaning are inappropriate, and theories focus instead on sociocultural contexts<sup>[27]</sup>. This study did not set out to prove or disprove a hypotheses; it set out to generate new data from which an understanding of living with PFP might be developed. The authors wanted to take an epistemological position that recognises the experience at an individual level, and any meanings attached, whilst considering the wider context within a sociocultural perspective. Sitting central on the spectrum of realism and constructivism, this position is described as "contextualist" by Braun and Clarke<sup>[27]</sup>.

## Recruitment

A convenience sample of ten participants with a diagnosis of PFP were recruited from an NHS physiotherapy waiting list. Based on similar studies of other musculoskeletal conditions, we anticipated this sample size would be sufficient to reach data saturation, and was agreed a priori.<sup>[22,29]</sup> Participants were initially contacted by mail and followed up by a telephone call (BES). Thirty four information sheets were sent out, and 24 potential participants were contacted by telephone; two could not make the interview before physiotherapy was due to start; five people physiotherapy had already commenced; one reported resolution of symptoms; and six declined to participate. Inclusion criteria were participants aged 18 to 40 with signs and symptoms of PFP, defined as: anterior or retro-patellar pain reported on at least two of the following activities; prolonged sitting, ascending or descending stairs, squatting, jumping and running.<sup>[4]</sup> These were pre-screened during an initial telephone conversation. Exclusion criteria included: previous knee surgery; awaiting lower limb surgery; knee ligamentous instability; history of patellar dislocation; true knee locking or giving way; reasons to suspect systemic pathology, or acute illness; pregnancy or breast feeding; patellar or iliotibial tract tendinopathy; and those not able to speak or understand English. The exclusion criteria were screened prior to consent being taken (BES).

## Data Collection

1  
2  
3 Participants were offered interviews at their home, or in a hospital-based physiotherapy  
4 department; all opted to be interviewed at the hospital. On arrival the researcher (BES) introduced  
5 himself as a physiotherapist working in that department, and also a researcher conducting a PhD.  
6 The researcher explained the aims of the study. Written consent and verbal consent was taken to  
7 start recording.  
8

9  
10 With reference to previous literature on low back pain, shoulder pain and tendon pain,<sup>[20–22]</sup> semi-  
11 structured interviews were designed by the researchers using a topic guideline with prompts to  
12 explore participants' experience of: living with PFP; past healthcare management; their  
13 interpretation of causation of their pain; beliefs, attitudes and behaviour in relation to their pain and  
14 expectations for the future. The semi-structured interviews allowed for a flexible interview, in a two-  
15 way conversation, allowing new ideas to be developed as they were brought up.  
16

17  
18 The researcher also maintained a reflective journal, noting down initial thoughts and ideas after  
19 each interview.<sup>[22]</sup> This identified that early interviews raised issues about other (past and present)  
20 musculoskeletal pain, and specific coping strategies employed by participants for their PFP. These  
21 were therefore incorporated into subsequent interview schedules.  
22

### 23 **Data Analysis**

24 All audio files were collected and transcribed verbatim (BES). During transcription, initial thoughts  
25 and ideas were noted in the reflective journal. Audio files were listened to several times to check for  
26 accuracy, and transcriptions were read and re-read a number of times; this initial process of data  
27 familiarisation allowed for 'data immersion' by the researchers, and generation of preliminary  
28 ideas.<sup>[27]</sup> Data coding then identified and coded pertinent features of the data giving equal priority  
29 over the whole dataset. These steps were independently conducted by two researchers (BES & FM)  
30 who met to compare codes and develop agreement on the grouping of codes into themes. The  
31 generated themes were reviewed and refined, ensuring that they explained the data in relation to  
32 the coded data, and the whole dataset. The researchers then consulted on the final two stages;  
33 themes and sub-themes were named and defined to demonstrate a clear narrative, using compelling  
34 extracts as illustrations. Consideration was given to each theme individually, but also to how they  
35 related to the dataset as a whole and other themes.<sup>[27]</sup>  
36  
37  
38  
39

40 Data were organised and analysed using QSR International's NVivo 11. After ten interviews, it was  
41 determined by the researchers that data saturation had occurred as no new thoughts or concepts  
42 were generated in the later interviews.  
43  
44  
45  
46  
47  
48  
49  
50  
51  
52  
53  
54  
55  
56  
57  
58  
59  
60

## Results

Participants ranged from 26 to 37 years of age (mean age 30.6), with a diagnosis of PFP for a mean duration of 78 months (range: 3 months to 16 years). For participants' characteristics see table 1. The interviews ranged from 13 to 43 minutes (mean time: 27 minutes).

**Table 1 Characteristics of participants**

| Participant Number | Gender | Age | Duration of symptoms (m) | Type of Employment |
|--------------------|--------|-----|--------------------------|--------------------|
| 1                  | F      | 26  | 60                       | Healthcare Worker  |
| 2                  | M      | 33  | 60                       | Builder            |
| 3                  | M      | 37  | 8                        | Office worker      |
| 4                  | F      | 26  | 192                      | Healthcare Worker  |
| 5                  | F      | 34  | 36                       | Office worker      |
| 6                  | F      | 27  | 84                       | Waitress           |
| 7                  | F      | 28  | 120                      | Technician         |
| 8                  | M      | 29  | 36                       | Office worker      |
| 9                  | F      | 36  | 3                        | Office worker      |
| 10                 | F      | 30  | 180                      | Office worker      |

F, female; M, male; m, months

The first theme that emerged from the data, impact on self, describes the participants' sense of loss, in relation to their self and self-identity. The further themes that emerged describe how the participants deal with this loss in a climate of uncertainty, how they understand or make decisions regarding exercise/activity and pain management, and how they prognosticate for the future. Data are presented to demonstrate the range and meaning to each theme.

### Theme 1: impact on self

Participants offered rich and detailed accounts of the impact and lived experience of PFP. Loss of self and loss of self-identity was evident in the stories told by many of the participants in this study. Self and self-identity are different concepts about ways in which individuals evaluate and interpret themselves; they are nested elements that are shaped by the contexts of individual's lives, with direct influence on decisions and behaviours.<sup>[30]</sup> Self, in its broader sense, can be defined as one's individuality and process of making sense of the world around them; it is a cognitive structure that defines one's sense of worth.<sup>[31]</sup> Self-identity, however, is the cognitive structure of internalised meanings and expectations associated with one's position and role within a social network.<sup>[32]</sup>

Symptoms affected all participants' daily life, with pain being a pervasive and disruptive feature of their day, with resulting loss of physical ability:

*"I struggle at work, bending down to get bottom shelf and getting back up, I literally have to hold onto the table to pull myself up. I can't do it off just my knees." [P7].*



---

“Yeah, well, it's a pain really because I'm walking around. I'm very stiff with that leg. Going up the stairs, down the stairs at work, getting out of a chair, getting into the car.” [P6].

Several participants described the negative impact of PFP on their mental well-being, with subsequent loss of self-identity:

“I would say the reason I got my horse was because I have mental health problems and so having a horse is my routine, structure, thing that I look forward to doing. The positive in my life. And having the knee problem makes that, makes that, not so effective. You can't do, what I imagined I would be able to do.” [P4].

Physical activity has been identified as a key quality of life domain, and the one most affected among patients with persistent pain.<sup>[33]</sup> Loss of activities for these participants included: walking; exercise; driving; holidays; time with family and friends; playing with children; duties at work and kneeling. These loss of activities directly affected participants' role and position within their social network, triggering feelings of loss of self-identity. For example, a number of participants explained how PFP affected their work, and made them question their career aspirations:

“I would say, it makes me like wonder, if I can do the job, not at this point but maybe when I get older and older, maybe I won't be able to do it”. [P4].

Judgemental attitudes from colleagues, friends or family, were described by a number of participants, with subsequent feelings of loss of self-identity, acting as moderators to low moods and feelings of premature ageing:

“They're saying that I'm a grandma. They say, 'Yeah. If you were a horse, they'd put you down (laughter). Just joking me, but obviously, it has affected me in the way that I've had to go out of work to go over to get physio. And I have had this time off, so I don't know if they're a bit, 'Well, it's not that bad.' Because day-to-day I try to be as normal as I can.” [P9].

Loss of significant relationships has emerged as a key aspect of loss in previous studies of patients with persistent pain,<sup>[34–36]</sup> and disruption to important and meaningful relationships was a strong and common theme found in patients with PFP. For example:

“I've missed out of things over the years, spending time with friends, spending time with family and that kind of thing, because I've not been able to do it.” [P6].

As identified by the above extracts, PFP had a compelling and far reaching impact on the participants and their lives. The pain and its disruption to life; loss of self-identity; and loss of relationships were themes that emerged from the data.

## **Theme 2: uncertainty, confusion and sense making**

Confusion and sense making formed a central part in the lives of the participants, with a strong desire from all to elucidate the cause of their pain.

1  
2  
3 *"If I could find out what it was that was causing the pain, then you hope it would be gone*  
4 *within a year. But because we don't really know what's caused it, it's kinda trial and error. So*  
5 *I don't really know."* [P1].  
6

7 The predominant focus of the participants' beliefs and attempts at making sense of their pain was  
8 that biomechanical factors were causative, with individuals trying to link these factors to the  
9 development and maintenance of their pain.  
10

11 *"My running technique or, I'm not sure. I'm not sure about that. I'm not sure. I think that's*  
12 *one thing, maybe something to do with the running technique, or something, or something*  
13 *to do with that."* [P8].  
14  
15

16 Furthermore, confusion was also related to the episodic nature of the symptoms, with participants  
17 attempting to relate 'flare-ups' to the same biomedical factors.  
18

19 A number of participants told stories of structural and biomedical beliefs becoming deep-rooted and  
20 established when reinforced. For example, one participant recounted multiple encounters with  
21 healthcare practitioners that influenced and reinforced her structural belief.  
22  
23

24 *"The work physio guy said to me that he thinks that my heels have maybe gone in which has*  
25 *then pulled my kneecap out of alignment. So instead of going smoothly over the joint where*  
26 *it's supposed to, that it's probably moving over the bone and that's the sharp pain that I'm*  
27 *feeling. Which did make sense because it, like I said, felt like I'd got a rock underneath my*  
28 *kneecap at some stage."* [P9].  
29  
30

31 Some participants remembered biomechanical focused diagnoses they had been given by a  
32 healthcare practitioner they had seen many years in the past; highlighting the power and lasting  
33 influence healthcare practitioners have on their patients. For example one participant remembered  
34 the diagnosis she had received from a healthcare practitioner over 10 years ago:  
35  
36

37 *"I had to go to the hospital once to have x-rays... I don't know if he [doctor] was trying to*  
38 *scare me into doing some exercise or something, but he basically said the only thing they*  
39 *could do is break both of my thighs and twist them a bit and then heal them back together.*  
40 *And it would take me years to get back to walking properly."* [P4].  
41  
42

43 Joint noises are a common feature of normal joint movement,<sup>[22]</sup> however participants commonly  
44 reported distress and confusion at joint noises, often finding healthcare practitioners' explanations  
45 inadequate.  
46

47 *"It was the noise that was concerning me more than the pain. I'm used to hurting. I'm too*  
48 *small to play rugby for a start, and I'd been fighting for 20 years, so, erm, it's one of those,*  
49 *you get used to the pain, but it's just the noise. When you start, you sort of [say] no, that's*  
50 *not right."* [P3].  
51  
52

53 This was in agreement with previous research, which identified negative emotions and inaccurate  
54 etiological beliefs with joint noises in patients with PFP.<sup>[37]</sup>  
55  
56  
57  
58  
59  
60

1  
2  
3 Expressly linked to participants' confusion and need to find the cause of their pain was also a strong  
4 desire to pursue radiological imaging, and feelings of not being taken fully seriously by the  
5 healthcare profession when this was not forthcoming.  
6

7 *"I want to know exactly what the problem is. Obviously, the doctor said, previously going*  
8 *back, they said tendonitis, and now they're saying it's runner's knee or whatever. But you*  
9 *know, it's still like, is that 100%, are you sure that's what it is? Because I was going to ask the*  
10 *doctor to send me for a MRI..." [P8].*  
11

12  
13 Previous research has linked poor outcomes with radiological imaging in populations with low back  
14 pain, suggesting an over use of imaging has a detrimental effect on outcomes.<sup>[38]</sup> There was one  
15 example of the resulting radiological findings compounding the confusion and distrust, for example  
16 Participant Six explained her feelings on a normal MRI finding as:  
17

18 *"I mean I was a bit concerned, because they didn't turn around and say, you have hurt it, but*  
19 *it's not major but this is what you've done, but they didn't actually, they said nothing's*  
20 *wrong, take the knee brace off, and carry on. [I was] almost deflated, because I was like*  
21 *wanting to know why it was hurting, but they weren't explaining any of that to me. So it's a*  
22 *bit like, difficult." [P6].*  
23  
24

25 Another participant's story demonstrates the negative impact of discordance between healthcare  
26 practitioners' diagnosis and advice, further compounding confusion and mistrust:  
27

28 *"Well, it makes you wonder then which one to believe, because I'm like, 'Well okay, he's told*  
29 *me not to do anything until I'm pain-free, because he doesn't want me to aggravate it,' but*  
30 *when, when I came here, and obviously they said that it would probably be best to start*  
31 *putting an impact on it again ... "* [P9].  
32  
33

34 The sense-making processes that participants described were established from past experience of  
35 healthcare treatment, past experience of pain and cultural beliefs around structure and pain.  
36

### 37 **Theme 3: exercise and activity beliefs**

  
38

39 All participants identified specific beliefs regarding barriers to exercise and activity. These were  
40 informed by factors relating to: diagnosis uncertainty; cultural beliefs around pain; fear-avoidant  
41 behaviours and the iatrogenic effect of healthcare.  
42

43 Diagnosis uncertainty, contributed to participants' beliefs regarding exercise and activity. In  
44 particular, it underpinned a dilemma regarding the relationship between activity and potential harm:  
45

46 *"It's 'are you making it worse?' And that's the crux of it really. As I'm doing it and thinking, 'if*  
47 *this is hurting, should I really be doing this, or shall I pack this in and do something else?' But*  
48 *it's the not knowing ... "* [P5].  
49  
50

51 Cultural beliefs around pain being a direct sign of tissue damage was evident in a large proportion of  
52 the participants' narratives, resulting in negative behaviour towards exercise and activity.  
53

54 *"...with me it's always been, if something hurt it because your body's telling you if you do*  
55 *that you're going to cause more injury. You'll make things worse." [P6].*  
56  
57  
58  
59  
60

1  
2  
3 Associated with the cultural beliefs on pain and damage was the resultant fear-avoidant behaviour.  
4 Participants, frequently contradicted themselves however; many participants would express the  
5 sentiment that they would not let the pain stop them from doing what they wanted to do, yet  
6 demonstrated clear activity withdrawal.  
7

8 *“So for example, we went to [holiday resort] last year; on your feet all day, walking miles and*  
9 *miles, I would be, like, in tears by the end of the day. I wouldn’t let it stop me the next day*  
10 *because I would be, like, I’m doing this” [P4].*  
11

12  
13 *“When I was in [holiday resort]; a couple of days I didn’t go out and I stayed back at the*  
14 *hotel. Because I couldn’t do it, I needed to rest.” [P4].*  
15

---

16  
17  
18  
19 A predominant sub-theme was the association of sport and exercise, even in the absence of pain, as  
20 a potential precursor to future joint pain and ‘damage’. Some participants attributed their current  
21 PFP to past sporting activities, despite no obvious mechanisms of injury.  
22

23 *“Yeah. Obviously it stems from doing long distance running.” [P7].*  
24

25 A number of participants discussed the direct impact of healthcare practitioner’s advice and  
26 diagnosis labelling on their exercise and activity levels, suggesting an iatrogenic effect of healthcare  
27 for PFP patients.  
28

29 *“I have been told by doctors before I shouldn’t run because it would jar my knee and*  
30 *shouldn’t run or walk on an uneven surface because it will wonk my knee from side to side.”*  
31 *[P4].*  
32

---

33  
34  
35  
36 *“But then when I started the physio at work and he told me that I shouldn’t walk or that I*  
37 *shouldn’t swim because he just wanted to obviously manipulate it and get me pain-free*  
38 *before I did anything that could possibly aggravate it. So I stopped.” [P9].*  
39

40 This theme identified a number of beliefs associated as a barrier to activity and exercise  
41 engagement. These included diagnosis uncertainty; cultural beliefs around pain; fear-avoidant  
42 behaviours and the iatrogenic effect of healthcare.  
43

#### 44 **Theme 4: behavioural coping strategies**

45

46  
47 A central coping strategy for participants of this study was the concept of rest. Many of them  
48 associated rest, and avoidance of activity, with the idea that time was necessary for the healing  
49 process, and that aggravating activities should be avoided.  
50

51 *“I try, obviously, sit down as much as I can.” [P4].*  
52

53 One participant expressed an expectation that healthcare professionals would advise him not to  
54 continue with activity and exercise:  
55

56 **R:** *So you think physios would say no [to keep physically active]?*  
57  
58  
59  
60

1  
2  
3 **P8:** *Physios would probably say no. Yeah, you shouldn't do it.*

4  
5 Another common coping strategy was postural adjustments; participants often talked of preferred  
6 sitting positions in relation to knee flexion.

7  
8 In keeping with previous research on the high levels of analgesic use in patients with PFP,<sup>[7]</sup> a  
9 common narrative shared with participants was the use of analgesics, with some acknowledging  
10 they were not effective.

11  
12 *"I have had some strong painkillers from the doctors. They gave me some naproxen and*  
13 *some codeine to manage it when it was at its worst but I try not to take them."* [P9].

14  
15 The use of knee supports was also common in the self-management strategies employed by the  
16 participants.

17  
18 *"If it hurts, it hurts. I'll try and strap my knee up. Because if I know I'm going harder in like*  
19 *gym classes, I'll strap my knees up before I go. And then when I get too much pain, I'll stop*  
20 *the exercise."* [P10].

## 21 22 23 24 **Theme 5: expectations of the future**

25 A number of participants expressed views, which could be contextualised as an external locus of  
26 control, with expectations of passive physiotherapeutic treatment options.

27  
28 *"I would presume manipulation of muscles groups, joints and tendons."* [P3].

29  
30 Even though the majority of participants expressed negative views about the future, they all  
31 expressed a desire to be pain free, over and above any functional improvements.

32  
33 **R:** *With the physio, what would you class as a success?*

34  
35 **P8:** *Getting rid of the pain.*

36  
37  
38 Nine of the ten participants held negative beliefs about the future; particularly in relation to  
39 prognostic prediction following their referral to physiotherapy.

40  
41 *"But then when I'm going up the stairs and it hurts it does concern me that it's going to be*  
42 *every day for the rest of my life I'm going to be struggling to walk upstairs. And then I think*  
43 *about getting old, and I think I'm going to end up with a stair lift and living downstairs and*  
44 *that sort of thing."* [P1].

45  
46  
47  
48  
49 *"[the pain is] definitely preying on my mind. Is it gonna stop me from going into the police, is*  
50 *that gonna stop me doing the things I want to do later on in life? So yeah, it does prey on my*  
51 *mind a little bit."* [P6].

52  
53 Central to their negative beliefs about the future and their prognosis was low self-efficacy.  
54 Participants felt they had very little control over their symptoms.

1  
2  
3 *"[In] my head, my thought process is I just hate it. Do an operation. Get rid of it. In my head,*  
4 *and obviously not being from the medical profession, but I'm just like, "Just get rid of the pain*  
5 *however it can be done." [P8].*  
6  
7

---

8  
9 *"Yes, I'm 37 now and they feel older than that. You just get that feeling, don't you, I've*  
10 *bounced back from lots of injuries before but this is the one that is making me think. You*  
11 *know, when this gets cold I can feel it, and thinking there's already arthritis there, I'm in*  
12 *trouble, it sets the brain going." [P3].*  
13  
14

---

15  
16  
17 Low expectation of physiotherapy, and past physiotherapy failed treatments were also a core theme  
18 within future expectations.

19  
20 **R:** *Have you got any expectations of what might happen when you walk in to see the physio?*

21  
22 **P10:** *I expect them to turn around and say physio can't help.*  
23

---

24  
25  
26 *"When I did get the physiotherapy it kinda didn't really do anything anyway. So it just made*  
27 *me think, it's pointless, 'cause they was trying to remove the fluid from out my knee, that like*  
28 *I say, made it worse to begin with. She did say your knees will feel sore, but it went back to*  
29 *how it was anyway, so, it just seemed like a pointless process." [P7].*  
30

31  
32 There was one exception, with one participant having positive outlook to the future and their  
33 physiotherapy referral.

34  
35 *"Oh yeah, I think it will get better. Yeah, I'd go for the better option." [P9].*  
36

37 The main sub-themes that emerged under the future were: beliefs that their pain will get worse;  
38 external locus of control with regards to treatment; low self-efficacy; poor opinion of physiotherapy  
39 and previous failed physiotherapy treatments and an overwhelming desire to be pain free, over and  
40 above any practical goals for rehabilitation.  
41

## 42 43 **Discussion**

### 44 45 **Main Findings**

46  
47 Quantitative research methodologies dominate the literature for PFP. This is the first study to use a  
48 qualitative method of inquiry to gain data on the experiences of people living with PFP. The five  
49 major themes that emerged from the data were: (1) impact on self; (2) uncertainty, confusion and  
50 sense making; (3) exercise and activity beliefs; (4) behavioural coping strategies and (5) expectations  
51 of the future.  
52

53  
54 A key finding of this study is that loss of physical ability is profound and considerable, and plays a  
55 significant role in participants' lives; despite previous research suggesting that PFP is a benign and  
56  
57  
58  
59

1  
2  
3 self-limiting condition.<sup>[5]</sup> An inability to continue with significant and meaningful activities has been  
4 identified as a cause of anxiety in people with persistent pain.<sup>[39]</sup> Persistent pain interrupts behaviour  
5 and a person's self-identity by affecting a sense of who they are, and what they might become.<sup>[40]</sup> As  
6 a result, lives are socially and environmentally restricted by persistent interruptions, or an inability  
7 to complete, or even attempt important tasks and activities.<sup>[40]</sup> With changes and loss of  
8 participants' position and role, for example with employment or family duties, the internalised  
9 meanings and expectations associated with one's self-identity is further threatened.<sup>[32]</sup>

10  
11  
12 Participants expressed intense confusion around their pain and symptoms. For instance, the  
13 causative reasons were elusive and troubling, as too was the ability to predict and control the pain  
14 intensity; and any attempts that participants made at understanding were firmly within the  
15 biomechanical sphere of reasoning. An inability to make sense of pain, and the process associated  
16 with sense-making and pain-related fear has been proposed in low back pain populations.<sup>[41]</sup>  
17 Previous research has identified that an inability to make sense of pain places 'lives on hold',<sup>[42]</sup> and  
18 may lead to more 'catastrophising'.<sup>[43]</sup>

19  
20  
21 There remains scientific debate and uncertainty around the underlying aetiology of PFP,<sup>[44]</sup> and there  
22 is a large variation in the way PFP is managed by physiotherapists in the UK.<sup>[45]</sup> The majority of  
23 participants in this study had previous experience of healthcare management for PFP suggesting that  
24 variation in healthcare treatment may have a negative impact on the patients' lived experience.  
25 Historically the biomedical model of pain establishes a direct relationship between tissue structure  
26 and pain,<sup>[46]</sup> and participants characteristically attributed their pain to structure and/or anatomical  
27 problems. However several studies have recently demonstrated that structural abnormalities of the  
28 patellofemoral joint on Magnetic Resonance Imaging (MRI) are not associated with PFP.<sup>[47,48]</sup> Three  
29 participants had no previous healthcare management for PFP, but nevertheless gave a  
30 biomechanical/structural cause for their pain; all three had previous physiotherapy for other pain  
31 conditions, including back, hips and ankles. This may suggest that exposure to biomechanical  
32 approaches to the management of musculoskeletal pain in general could, potentially, have a  
33 carryover to other locations of pain, with a negative effect.

34  
35  
36  
37 The iatrogenic effect of healthcare is an emerging field of research in the low back pain population  
38 <sup>[38,49]</sup>. This study is the first to find such a theme in patients with PFP. These findings are consistent  
39 with recent research that showed that the majority of UK physiotherapists would advise their  
40 patients not to continue with exercises if they experienced any pain.<sup>[45]</sup> The fear-avoidance model of  
41 pain is a well-established with patients with persistent pain, particularly persistent low back pain,<sup>[17]</sup>  
42 additionally research has shown that fear-avoidance behaviour may also exist with clinicians.<sup>[25,45,50]</sup>  
43 The central concept of the model is cognitions and emotions that underpin fear of the pain; fears  
44 about potential physical activities exacerbating the pain and further 'damaging' bodies. The fear  
45 leads to safety seeking behaviours and hypervigilance that paradoxically maintains or exacerbates  
46 the pain and disability.<sup>[22]</sup> In contrast, if pain is perceived in a non-threatening way patients are likely  
47 to maintain physical activity levels, through which recovery can be achieved.<sup>[51,52]</sup> All of the ten  
48 participants in this study described fear-avoidant behaviour at some stage of their interview. This is  
49 the first study, which we know of, that identifies this behaviour in patients with a diagnosis of PFP.

50  
51  
52  
53 Patellofemoral pain is often described as an 'overuse' injury,<sup>[53]</sup> and these data seem to be consistent  
54 with the patients' belief and behaviour with a definition more aligned with the English language  
55 meaning of 'overuse'. Contemporary thinking in relation to injury risk challenges the idea that PFP is  
56  
57  
58  
59

1  
2  
3 simply an 'overuse' injury, with evidence suggesting that persistent and long-term under-use may be  
4 a risk factor, with consistent exposure to tissue load being considered one method of  
5 management.<sup>[54]</sup> The fear-avoidant behaviours revealed within this study would therefore be seen  
6 as negative pain behaviour, with long-term detrimental consequences.  
7

8  
9 A key finding of this research is the low expectation for the future and low self-efficacy  
10 demonstrated by the majority of the participants that could be conceptualised as 'catastrophising'.  
11 Catastrophising is conceptually within the same model of pain behaviour as fear-avoidance, with  
12 largescale overlap.<sup>[19]</sup> Low self-efficacy, fear of the future and catastrophising is a common finding in  
13 patients with persistent pain.<sup>[24,55]</sup> The National Institute of Health and Care Excellence describes  
14 pain as a complex biopsychosocial issue, associated with expectations, self-efficacy, mood and  
15 coping abilities.<sup>[56]</sup> In addition, it has been shown that self-efficacy is a strong predictor of successful  
16 outcome, irrespective of the intervention delivered, for patients with persistent pain; suggesting  
17 that rehabilitation programmes for persistent musculoskeletal pain should be designed with the aim  
18 of improving self-efficacy.<sup>[57]</sup>  
19  
20

## 21 **Clinical and research implications**

22 This study established that a sample of patients with PFP demonstrated: pain-related fear, such as  
23 fear-avoidance; damage beliefs; difficulty with making sense of their pain; low self-efficacy and fear  
24 of the future.  
25  
26

27 The current consensus that best evidence treatments consisting of hip and knee strengthening may  
28 not be adequate to address the fears and beliefs identified in the current study. Future studies are  
29 needed to explore biopsychosocial targeted interventions for this population, particularly in relation  
30 to pain experienced by patients during exercise, followed by efficacy and effectiveness trials.  
31 Interventions may be patient education packages and self-management strategies targeting self-  
32 efficacy and physical activity. Furthermore, future qualitative work will be beneficial to understand  
33 the role of medical terminology commonly used with this patient group, for example, 'weakness'  
34 and 'patellar mal-tracking',<sup>[45]</sup> and its impact and interpretation by patients.  
35  
36  
37

## 38 **Study limitations and strengths**

39 Two authors independently coded all transcripts, and this study employed a clear, transparent and  
40 reproducible methodological approach to data analysis. The authors make it clear that their clinical  
41 and research experience lie within the biopsychosocial framework of musculoskeletal pain and this  
42 study forms part of a larger body of research looking at pain education, self-management strategies  
43 and exercise interventions for individuals with PFP.<sup>[58]</sup> It is worth noting that the interviewer made it  
44 explicit to the participants that he was a physiotherapist working in the department conducting the  
45 research; indeed a number of them did proceed to ask clinical questions about their condition,  
46 highlighting a power dynamic between the interviewer and participant. Furthermore, it is important  
47 to note that recruitment took place in the same department that the researcher was working as a  
48 physiotherapist. This may, in part, have influenced participants' inclination to take part, and also  
49 their responses.  
50  
51  
52

53 The main limitation of this study is that for pragmatic reasons a convenience sampling technique  
54 was used. It is possible that this sample may differ from other samples within the UK, and how  
55 representative these findings are to the greater population of individuals with PFP is unknown. A  
56  
57  
58  
59



purposive sampling technique may have better represented sociodemographic groups, or targeted identifiable subgroups.

## Conclusion

These findings offer an insight into the experience of individuals living with PFP. Previous literature have focused on pain and biomechanics, rather than the individual experience, attached meanings and any wider context within a sociocultural perspective. The participants provided rich and detailed narratives of loss of physical and functional ability; loss of self-identity; pain related confusion and difficulty making sense of their pain; pain-related fear, including fear-avoidance and 'damage' beliefs; inappropriate coping strategies and fear of the future. Our findings suggest future research is warranted into biopsychosocial targeted interventions and the impact and interpretation of medical terminology.

## Authors' contributions

BES was responsible for conception and design, compiling the interview schedule, interviewing, transcribing, coding, analysis and interpretation, drafting and revising the manuscript. FM was responsible for conception and design, compiling the interview schedule, coding, analysis and interpretation, drafting and revising the manuscript. PH, MB, JS, MR, TS and PL were involved in conception and design, interpretation and reviewing revisions to the manuscript. All authors have read and approved of the final manuscript.

## Funding

This report is independent research arising from a Clinical Doctoral Research Fellowship, Benjamin Smith, ICA-CDRF-2015-01-002 supported by the National Institute for Health Research (NIHR) and Health Education England (HEE). The views expressed in this publication are those of the author(s) and not necessarily those of the NHS, the NIHR, HEE or the Department of Health.

## Competing interests

The authors declare that they have no competing interests.

## Ethics approval

This study was approved by the West Midlands - Black Country Research Ethics Committee (16/WM/0414).

## Availability of data

Quotations and further details are available from Benjamin Smith at [benjamin.smith3@nhs.net](mailto:benjamin.smith3@nhs.net)

## Supplementary Data

Data supplement 1 – Code Book

## References

- 1 Dey P, Callaghan M, Cook N, *et al.* A questionnaire to identify patellofemoral pain in the community: an exploration of measurement properties. *BMC Musculoskelet Disord* 2016;17:237. doi:10.1186/s12891-016-1097-5
- 2 Urwin M, Symmons D, Allison T, *et al.* Estimating the burden of musculoskeletal disorders in the community: the comparative prevalence of symptoms at different anatomical sites, and the relation to social deprivation. *Ann Rheum Dis* 1998;57:649–55.
- 3 Jordan KP, Kadam UT, Hayward R, *et al.* Annual consultation prevalence of regional musculoskeletal problems in primary care: an observational study. *BMC Musculoskelet Disord* 2010;11:144. doi:10.1186/1471-2474-11-144
- 4 Crossley KM, Stefanik JJ, Selfe J, *et al.* 2016 Patellofemoral pain consensus statement from the 4th International Patellofemoral Pain Research Retreat, Manchester. Part 1: Terminology, definitions, clinical examination, natural history, patellofemoral osteoarthritis and patient-reported outcome m. *Br J Sports Med* 2016;50:839–43.
- 5 Sandow MJ, Goodfellow JW. The natural history of anterior knee pain in adolescents. *J Bone Joint Surg Br* 1985;67:36–8.
- 6 Collins NJ, Bierma-Zeinstra SMA, Crossley KM, *et al.* Prognostic factors for patellofemoral pain: a multicentre observational analysis. *Br J Sports Med* 2013;47:227–33. doi:10.1136/bjsports-2012-091696
- 7 Stathopulu E, Baildam E. Anterior knee pain: a long-term follow-up. *Rheumatology (Oxford)* 2003;42:380–2.
- 8 Rathleff MS, Rasmussen S, Olesen JL. Unsatisfactory long-term prognosis of conservative treatment of patellofemoral pain syndrome. *Ugeskr Laeger* 2012;174:1008–13.
- 9 Smith BE, Hendrick P, Logan P. Patellofemoral pain: Challenging current practice - A case report. *Man Ther* 2016;22:216–9. doi:10.1016/j.math.2015.09.002
- 10 Doménech J, Sanchis-Alfonso V, López L, *et al.* Influence of kinesiophobia and catastrophizing on pain and disability in anterior knee pain patients. *Knee Surgery, Sport Traumatol Arthrosc* 2013;21:1562–8. doi:10.1007/s00167-012-2238-5
- 11 Piva SR, Fitzgerald GK, Wisniewski S, *et al.* Predictors of pain and function outcome after rehabilitation in patients with patellofemoral pain syndrome. *J Rehabil Med* 2009;41:604–12. doi:10.2340/16501977-0372

- 1  
2  
3 12 Piva SR, Fitzgerald GK, Irrgang JJ, *et al.* Associates of Physical Function and Pain in Patients  
4 with Patellofemoral Pain Syndrome. *Arch Phys Med Rehabil* 2009;90:285–95.  
5 doi:10.1016/j.apmr.2008.08.214  
6  
7  
8 13 Quartana PJ, Campbell CM, Edwards RR. Pain catastrophizing: a critical review. *Expert Rev*  
9 *Neurother* 2009;9:745–58. doi:10.1586/ern.09.34  
10  
11  
12 14 Moseley GL, Arntz A. The context of a noxious stimulus affects the pain it evokes. *PAIN*<sup>®</sup>  
13 2007;133:64–71.  
14  
15  
16 15 Harvie DS, Broecker M, Smith RT, *et al.* Bogus visual feedback alters onset of movement-  
17 evoked pain in people with neck pain. *Psychol Sci* 2015;:0956797614563339.  
18  
19  
20 16 Lobanov O V, Zeidan F, McHaffie JG, *et al.* From cue to meaning: Brain mechanisms  
21 supporting the construction of expectations of pain. *PAIN*<sup>®</sup> 2014;155:129–36.  
22  
23  
24 17 Chou R, Shekelle P. Will this patient develop persistent disabling low back pain? *JAMA*  
25 2010;303:1295–302. doi:10.1001/jama.2010.344  
26  
27  
28 18 Mallows A, Debenham J, Walker T, *et al.* Association of psychological variables and outcome  
29 in tendinopathy: a systematic review. *Br J Sports Med* 2016;:bjsports – 2016.  
30  
31  
32 19 Wertli MM, Rasmussen-Barr E, Weiser S, *et al.* The role of fear avoidance beliefs as a  
33 prognostic factor for outcome in patients with nonspecific low back pain: a systematic  
34 review. *spine J* 2014;14:816–36.  
35  
36  
37 20 Osborn M, Smith JA. The personal experience of chronic benign lower back pain: An  
38 interpretative phenomenological analysis. *Br J Pain* 2015;9:65–83.  
39  
40  
41 21 Smith JA, Osborn M. Pain as an assault on the self: An interpretative phenomenological  
42 analysis of the psychological impact of chronic benign low back pain. *Psychol Heal*  
43 2007;22:517–34.  
44  
45  
46 22 Jones S, Hanchard N, Hamilton S, *et al.* A qualitative study of patients' perceptions and  
47 priorities when living with primary frozen shoulder. *BMJ Open* 2013;3:e003452.  
48  
49  
50 23 Walker J, Holloway I, Sofaer B. In the system: the lived experience of chronic back pain from  
51 the perspectives of those seeking help from pain clinics. *Pain* 1999;80:621–8.  
52  
53  
54 24 Walker J, Sofaer B, Holloway I. The experience of chronic back pain: accounts of loss in those  
55 seeking help from pain clinics. *Eur J Pain* 2006;10:199.  
56  
57  
58  
59  
60

- 1  
2  
3 25 Nijs J, Roussel N, Paul van Wilgen C, *et al.* Thinking beyond muscles and joints: Therapists' and patients' attitudes and beliefs regarding chronic musculoskeletal pain are key to applying effective treatment. *Man Ther* 2013;18:96–102.  
4  
5  
6  
7  
8 26 Thorne S, Kirkham SR, MacDonald-Emes J. Focus on qualitative methods. Interpretive description: a noncategorical qualitative alternative for developing nursing knowledge. *Res Nurs Health* 1997;20:169–77.  
9  
10  
11  
12  
13 27 Braun V, Clarke V. Using thematic analysis in psychology. *Qual Res Psychol* 2006;3:77–101.  
14  
15  
16 28 Tong A, Sainsbury P, Craig J. Consolidated criteria for reporting qualitative research (COREQ): a 32-item checklist for interviews and focus groups. *Int J Qual Heal care* 2007;19:349–57.  
17  
18  
19 29 Mc Auliffe S, Synott A, Casey H, *et al.* Beyond the tendon: Experiences and perceptions of people with persistent Achilles tendinopathy. *Musculoskelet Sci Pract* 2017;29:108–14.  
20  
21  
22  
23 30 Leary MR, Tangney JP. *Handbook of self and identity*. Guilford Press 2011.  
24  
25  
26 31 Baumeister RF. *The self in social psychology*. 1999.  
27  
28  
29 32 Stryker S, Burke PJ. The past, present, and future of an identity theory. *Soc Psychol Q* 2000;:284–97.  
30  
31  
32  
33 33 Lamé IE, Peters ML, Vlaeyen JWS, *et al.* Quality of life in chronic pain is more associated with beliefs about pain, than with pain intensity. *Eur J Pain* 2005;9:15–24.  
34  
35  
36  
37 34 Aldrich S, Eccleston C. Making sense of everyday pain. *Soc Sci Med* 2000;50:1631–41.  
38  
39  
40 35 Charmaz K. From the 'sick role' to stories of self: Understanding the self in illness. *Rutgers Ser Self Soc Identity* 1999;2:209–39.  
41  
42  
43  
44 36 Johansson EE, Hamberg K, Westman G, *et al.* The meanings of pain: an exploration of women's descriptions of symptoms. *Soc Sci Med* 1999;48:1791–802.  
45  
46  
47  
48 37 Robertson CJ, Hurley M, Jones F. People's beliefs about the meaning of crepitus in patellofemoral pain and the impact of these beliefs on their behaviour: A qualitative study. *Musculoskelet Sci Pract* 2017;28:59–64. doi:10.1016/j.msksp.2017.01.012  
49  
50  
51  
52 38 Webster BS, Bauer AZ, Choi Y, *et al.* Iatrogenic consequences of early magnetic resonance imaging in acute, work-related, disabling low back pain. *Spine (Phila Pa 1976)* 2013;38:1939–46.  
53  
54  
55  
56  
57  
58  
59  
60

- 1  
2  
3 39 Roy R. *Chronic pain, loss and suffering*. University of Toronto Press 2004.  
4  
5  
6 40 Harris S, Morley S, Barton SB. Role loss and emotional adjustment in chronic pain. *Pain*  
7 2003;105:363–70.  
8  
9  
10 41 Bunzli S, Smith A, Schütze R, *et al*. Beliefs underlying pain-related fear and how they evolve: a  
11 qualitative investigation in people with chronic back pain and high pain-related fear. *BMJ*  
12 *Open* 2015;5.  
13  
14  
15 42 Bunzli S, Watkins R, Smith A, *et al*. Lives on hold: a qualitative synthesis exploring the  
16 experience of chronic low-back pain. *Clin J Pain* 2013;29:907–16.  
17  
18  
19 43 van Wilgen CP, van Ittersum MW, Kaptein AA, *et al*. Illness perceptions in patients with  
20 fibromyalgia and their relationship to quality of life and catastrophizing. *Arthritis Rheum*  
21 2008;58:3618–26.  
22  
23  
24 44 Doménech J, Sanchis-Alfonso V, Espejo BBB, *et al*. Changes in catastrophizing and  
25 kinesiophobia are predictive of changes in disability and pain after treatment in patients with  
26 anterior knee pain. *Knee Surg Sports Traumatol Arthrosc* 2014;22:2295–300.  
27 doi:10.1007/s00167-014-2968-7  
28  
29  
30 45 Smith BE, Hendrick P, Bateman M, *et al*. Current Management Strategies for Patellofemoral  
31 Pain: An online survey of 99 practising UK physiotherapists. *BioMed Cent Musculoskelet*  
32 *Disord* 2017;18. doi:10.1186/s12891-017-1539-8  
33  
34  
35 46 Doménech J, Sanchis-Alfonso V, Espejo B. Influence of Psychological Factors on Pain and  
36 Disability in Anterior Knee Pain Patients. In: *Anterior Knee Pain and Patellar Instability*.  
37 London: : Springer London 2011. 123–35. doi:10.1007/978-0-85729-507-1\_9  
38  
39  
40 47 van der Heijden RA, Oei EHG, Bron EE, *et al*. No Difference on Quantitative Magnetic  
41 Resonance Imaging in Patellofemoral Cartilage Composition Between Patients With  
42 Patellofemoral Pain and Healthy Controls. *Am J Sports Med* 2016;44:1172–8.  
43 doi:10.1177/0363546516632507  
44  
45  
46 48 van der Heijden RA, de Kanter JLM, Bierma-Zeinstra SMA, *et al*. Structural Abnormalities on  
47 Magnetic Resonance Imaging in Patients With Patellofemoral Pain: A Cross-sectional Case-  
48 Control Study. *Am J Sports Med* 2016;44:2339–46. doi:10.1177/0363546516646107  
49  
50  
51 49 Lin IB, O’Sullivan PB, Coffin JA, *et al*. Disabling chronic low back pain as an iatrogenic disorder:  
52 a qualitative study in Aboriginal Australians. *BMJ Open* 2013;3:1–8.  
53  
54  
55 50 Littlewood C, Lowe A, Moore J. Rotator cuff disorders: a survey of current UK physiotherapy  
56 practice. *Shoulder Elb* 2012;4:64–71. doi:10.1111/j.1758-5740.2011.00164.x  
57  
58  
59

- 1  
2  
3 51 Leeuw M, Goossens MEJB, Linton SJ, *et al.* The fear-avoidance model of musculoskeletal pain:  
4 current state of scientific evidence. *J Behav Med* 2007;30:77–94. doi:10.1007/s10865-006-  
5 9085-0  
6  
7  
8 52 Vlaeyen JW, Linton SJ. Fear-avoidance and its consequences in chronic musculoskeletal pain:  
9 a state of the art. *Pain* 2000;85:317–32.  
10  
11  
12 53 Herrington L, Nester C. Q-angle undervalued? The relationship between Q-angle and medio-  
13 lateral position of the patella. *Clin Biomech (Bristol, Avon)* 2004;19:1070–3.  
14 doi:10.1016/j.clinbiomech.2004.07.010  
15  
16  
17 54 Gabbett TJ. The training-injury prevention paradox: should athletes be training smarter and  
18 harder? *Br J Sports Med* 2016;50:273–80. doi:10.1136/bjsports-2015-095788  
19  
20  
21 55 Arnstein P, Caudill M, Mandle CL, *et al.* Self efficacy as a mediator of the relationship between  
22 pain intensity, disability and depression in chronic pain patients. *Pain* 1999;80:483–91.  
23  
24  
25 56 National Institute for Clinical Excellence. Osteoarthritis: care and management. 2014.  
26  
27  
28 57 Miles CL, Pincus T, Carnes D, *et al.* Can we identify how programmes aimed at promoting self-  
29 management in musculoskeletal pain work and who benefits? A systematic review of sub-  
30 group analysis within RCTs. *Eur J Pain* 2011;15. doi:10.1016/j.ejpain.2011.01.016  
31  
32  
33 58 Smith BE, Hendrick P, Bateman M, *et al.* Study protocol: a mixed methods feasibility study for  
34 a loaded self-managed exercise programme for patellofemoral pain. *Pilot Feasibility Stud*  
35 2017;4. doi:10.1186/s40814-017-0167-2  
36  
37  
38  
39  
40  
41  
42  
43  
44  
45  
46  
47  
48  
49  
50  
51  
52  
53  
54  
55  
56  
57  
58  
59  
60

## Data supplement 1 – Code Book

Name

### Impact on self, sense of loss

Name

Pain experiences, disruption to life, distressing

Loss of identity, self

Relationships loss (time with family, friends, children, friends making fun, judgement)

Knee noises experiences, distressing

### Not understanding, sense making, confusion

Name

Trying to find cause

Anatomy and imaging central to causation

Historical diagnosis – i.e historical comments still central to beliefs

Distrust of healthcare – wanting scans

Not being taken seriously

Disagreement with healthcare increases uncertainty and distress

### Exercise and Activity Barriers

Name

Diagnosis uncertainty

Cultural beliefs around pain

Fear avoidance

Iatrogenic effect of healthcare

Sport = future 'damage'

Physio = exercise

contradiction

### Coping Strategies

Name

Central to coping is activity avoidance – despite saying they don't let it stop them

Postural adjustments

Rest

Analgesics – whilst acknowledging they don't work

Reliance on knee support – not knowing how they work

### The Future

Name

Belief will get worse

Effect of healthcare on that belief (including external locus of control)

Low self-efficacy

Low opinion of physio, past physio failures

Desire to be pain free

high expectation of prognosis

## Consolidated criteria for reporting qualitative studies (COREQ): 32-item checklist

Developed from:

Tong A, Sainsbury P, Craig J. Consolidated criteria for reporting qualitative research (COREQ): a 32-item checklist for interviews and focus groups. *International Journal for Quality in Health Care*. 2007. Volume 19, Number 6: pp. 349 – 357

**YOU MUST PROVIDE A RESPONSE FOR ALL ITEMS. ENTER N/A IF NOT APPLICABLE**

| No. Item                                       | Guide questions/description                                                                                                                              | Reported on Page # |
|------------------------------------------------|----------------------------------------------------------------------------------------------------------------------------------------------------------|--------------------|
| <b>Domain 1: Research team and reflexivity</b> |                                                                                                                                                          |                    |
| <i>Personal Characteristics</i>                |                                                                                                                                                          |                    |
| 1. Interviewer/facilitator                     | Which author/s conducted the interview or focus group?                                                                                                   | Page 5             |
| 2. Credentials                                 | What were the researcher's credentials?<br>E.g. PhD, MD                                                                                                  | Page 5             |
| 3. Occupation                                  | What was their occupation at the time of the study?                                                                                                      | Page 5             |
| 4. Gender                                      | Was the researcher male or female?                                                                                                                       | Page 5             |
| 5. Experience and training                     | What experience or training did the researcher have?                                                                                                     | Page 5             |
| <i>Relationship with participants</i>          |                                                                                                                                                          |                    |
| 6. Relationship established                    | Was a relationship established prior to study commencement?                                                                                              | Page 5             |
| 7. Participant knowledge of the interviewer    | What did the participants know about the researcher? e.g. personal goals, reasons for doing the research                                                 | Page 5             |
| 8. Interviewer characteristics                 | What characteristics were reported about the interviewer/facilitator? e.g. Bias, assumptions, reasons and interests in the research topic                | Page 5 & 15        |
| <b>Domain 2: study design</b>                  |                                                                                                                                                          |                    |
| <i>Theoretical framework</i>                   |                                                                                                                                                          |                    |
| 9. Methodological orientation and Theory       | What methodological orientation was stated to underpin the study? e.g. grounded theory, discourse analysis, ethnography, phenomenology, content analysis | Page 5             |
| <i>Participant selection</i>                   |                                                                                                                                                          |                    |
| 10. Sampling                                   | How were participants selected? e.g. purposive, convenience, consecutive, snowball                                                                       | Page 5             |
| 11. Method of approach                         | How were participants approached? e.g. face-to-face, telephone, mail, email                                                                              | Page 5             |
| 12. Sample size                                | How many participants were in the study?                                                                                                                 | Page 5             |



|                                        |                                                                                                                                 |            |
|----------------------------------------|---------------------------------------------------------------------------------------------------------------------------------|------------|
| 13. Non-participation                  | How many people refused to participate or dropped out? Reasons?                                                                 | Page 5     |
| <i>Setting</i>                         |                                                                                                                                 |            |
| 14. Setting of data collection         | Where was the data collected? e.g. home, clinic, workplace                                                                      | Page 5     |
| 15. Presence of non-participants       | Was anyone else present besides the participants and researchers?                                                               | Page 5     |
| 16. Description of sample              | What are the important characteristics of the sample? e.g. demographic data, date                                               | Page 7     |
| <i>Data collection</i>                 |                                                                                                                                 |            |
| 17. Interview guide                    | Were questions, prompts, guides provided by the authors? Was it pilot tested?                                                   | Page 5     |
| 18. Repeat interviews                  | Were repeat inter views carried out? If yes, how many?                                                                          | N/A        |
| 19. Audio/visual recording             | Did the research use audio or visual recording to collect the data?                                                             | Page 5     |
| 20. Field notes                        | Were field notes made during and/or after the inter view or focus group?                                                        | Page 5 & 6 |
| 21. Duration                           | What was the duration of the inter views or focus group?                                                                        | Page 7     |
| 22. Data saturation                    | Was data saturation discussed?                                                                                                  | Page 6     |
| 23. Transcripts returned               | Were transcripts returned to participants for comment and/or correction?                                                        | N/A        |
| <b>Domain 3: analysis and findings</b> |                                                                                                                                 |            |
| <i>Data analysis</i>                   |                                                                                                                                 |            |
| 24. Number of data coders              | How many data coders coded the data?                                                                                            | Page 6     |
| 25. Description of the coding tree     | Did authors provide a description of the coding tree?                                                                           | N/A        |
| 26. Derivation of themes               | Were themes identified in advance or derived from the data?                                                                     | Page 6     |
| 27. Software                           | What software, if applicable, was used to manage the data?                                                                      | NVivo      |
| 28. Participant checking               | Did participants provide feedback on the findings?                                                                              | NO         |
| <i>Reporting</i>                       |                                                                                                                                 |            |
| 29. Quotations presented               | Were participant quotations presented to illustrate the themes/findings? Was each quotation identified? e.g. participant number | Results    |
| 30. Data and findings consistent       | Was there consistency between the data presented and the findings?                                                              | Page 13    |
| 31. Clarity of major themes            | Were major themes clearly presented in the findings?                                                                            | RESULTS    |
| 32. Clarity of minor themes            | Is there a description of diverse cases or discussion of minor themes?                                                          | Discussion |

**Once you have completed this checklist, please save a copy and upload it as part of your submission. When requested to do so as part of the upload process, please select the file type: *Checklist*. You will NOT be able to proceed with**

1  
2  
3 **submission unless the checklist has been uploaded. Please DO NOT include this**  
4 **checklist as part of the main manuscript document. It must be uploaded as a**  
5 **separate file.**  
6  
7  
8  
9  
10  
11  
12  
13  
14  
15  
16  
17  
18  
19  
20  
21  
22  
23  
24  
25  
26  
27  
28  
29  
30  
31  
32  
33  
34  
35  
36  
37  
38  
39  
40  
41  
42  
43  
44  
45  
46  
47  
48  
49  
50  
51  
52  
53  
54  
55  
56  
57  
58  
59  
60

For peer review only

# BMJ Open

## The experience of living with patellofemoral pain: loss, confusion and fear-avoidance – a UK qualitative study

|                                 |                                                                                                                                                                                                                                                                                                                                                                                                                                                                                                                                                                                                                                                                                                                                                                                                                                                                                                                                                                                                                                                                               |
|---------------------------------|-------------------------------------------------------------------------------------------------------------------------------------------------------------------------------------------------------------------------------------------------------------------------------------------------------------------------------------------------------------------------------------------------------------------------------------------------------------------------------------------------------------------------------------------------------------------------------------------------------------------------------------------------------------------------------------------------------------------------------------------------------------------------------------------------------------------------------------------------------------------------------------------------------------------------------------------------------------------------------------------------------------------------------------------------------------------------------|
| Journal:                        | <i>BMJ Open</i>                                                                                                                                                                                                                                                                                                                                                                                                                                                                                                                                                                                                                                                                                                                                                                                                                                                                                                                                                                                                                                                               |
| Manuscript ID                   | bmjopen-2017-018624.R3                                                                                                                                                                                                                                                                                                                                                                                                                                                                                                                                                                                                                                                                                                                                                                                                                                                                                                                                                                                                                                                        |
| Article Type:                   | Research                                                                                                                                                                                                                                                                                                                                                                                                                                                                                                                                                                                                                                                                                                                                                                                                                                                                                                                                                                                                                                                                      |
| Date Submitted by the Author:   | 30-Nov-2017                                                                                                                                                                                                                                                                                                                                                                                                                                                                                                                                                                                                                                                                                                                                                                                                                                                                                                                                                                                                                                                                   |
| Complete List of Authors:       | Smith, Benjamin; Derby Teaching Hospitals NHS Foundation Trust, Physiotherapy Outpatients; University of Nottingham, Division of Rehabilitation and Ageing, School of Medicine<br>Moffatt, Fiona; University of Nottingham, Division of Physiotherapy and Rehabilitation Sciences, School of Health Sciences,<br>Hendrick, Paul ; University of Nottingham, Division of Physiotherapy and Rehabilitation Sciences, School of Health Sciences<br>Bateman, Marcus; Derby Teaching Hospitals NHS Foundation Trust, Physiotherapy Outpatients<br>Rathleff, Michael ; Aalborg University, Research Unit for General Practice in Aalborg, Department of Clinical Medicine ; Aalborg University Hospital, Department of Occupational Therapy and Physiotherapy, Department of Clinical Medicine<br>Selfe, James; Manchester Metropolitan University, Department of Health Professions<br>Smith, Toby O.; University of East Anglia, Faculty of Medicine and Health Sciences<br>Logan, Phillipa; University of Nottingham , Division of Rehabilitation and Ageing, School of Medicine |
| <b>Primary Subject Heading</b>: | Qualitative research                                                                                                                                                                                                                                                                                                                                                                                                                                                                                                                                                                                                                                                                                                                                                                                                                                                                                                                                                                                                                                                          |
| Secondary Subject Heading:      | Rehabilitation medicine, Sports and exercise medicine                                                                                                                                                                                                                                                                                                                                                                                                                                                                                                                                                                                                                                                                                                                                                                                                                                                                                                                                                                                                                         |
| Keywords:                       | patellofemoral pain, anterior knee pain, PFP                                                                                                                                                                                                                                                                                                                                                                                                                                                                                                                                                                                                                                                                                                                                                                                                                                                                                                                                                                                                                                  |
|                                 |                                                                                                                                                                                                                                                                                                                                                                                                                                                                                                                                                                                                                                                                                                                                                                                                                                                                                                                                                                                                                                                                               |

SCHOLARONE™  
Manuscripts

## **The experience of living with patellofemoral pain: loss, confusion and fear-avoidance – a UK qualitative study**

Benjamin E Smith<sup>1,2,\*</sup>, Fiona Moffatt<sup>3</sup>, Paul Hendrick<sup>3</sup>, Marcus Bateman<sup>1</sup>, Michael Skovdal Rathleff<sup>4,5</sup>, James Selfe<sup>6</sup>, Toby O Smith<sup>7</sup>, Pip Logan<sup>2</sup>

<sup>1</sup>Derby Teaching Hospitals NHS Foundation Trust, Physiotherapy Department (Level 3), London Road Community Hospital, Derby DE1 2QY, UK

<sup>2</sup>Division of Rehabilitation and Ageing, School of Medicine, University of Nottingham, Nottingham, UK

<sup>3</sup>Division of Physiotherapy and Rehabilitation Sciences, School of Health Sciences, University of Nottingham, Nottingham University Hospitals (City Campus), Nottingham, UK.

<sup>4</sup>Research Unit for General Practice in Aalborg, Department of Clinical Medicine at Aalborg University, Aalborg, Denmark

<sup>5</sup>Department of Occupational Therapy and Physiotherapy, Department of Clinical Medicine, Aalborg University Hospital, Denmark

<sup>6</sup>Department of Health Professions, Manchester Metropolitan University, Manchester, UK

<sup>7</sup>Faculty of Medicine and Health Sciences, University of East Anglia, Norwich, UK

\*Corresponding author. Tel: 01332 254631 Email: [benjamin.smith3@nhs.net](mailto:benjamin.smith3@nhs.net)

## Abstract

### Objectives:

To investigate the experience of living with patellofemoral pain.

### Design:

Qualitative study design using semi-structured interviews, and analysed thematically using the guidelines set out by Braun and Clarke.

### Setting:

A National Health Service (NHS) physiotherapy clinic within a large UK teaching hospital.

### Participants:

A convenience sample of ten participants, aged between 18 and 40, with a diagnosis of patellofemoral pain and on a physiotherapy waiting list, prior to starting physiotherapy.

### Results:

Participants offered rich and detailed accounts of the impact and lived experience of patellofemoral pain, including: loss of physical and functional ability; loss of self-identity; pain related confusion and difficulty making sense of their pain; pain related fear, including fear-avoidance and 'damage' beliefs; inappropriate coping strategies and fear of the future. The five major themes that emerged from the data were: (1) impact on self; (2) uncertainty, confusion and sense making; (3) exercise and activity beliefs; (4) behavioural coping strategies and (5) expectations of the future.

### Conclusions:

These findings offer an insight into the lived experience of individuals with patellofemoral pain. Previous literature has focused on pain and biomechanics, rather than the individual experience, attached meanings and any wider context within a sociocultural perspective. Our findings suggest future research is warranted into biopsychosocial targeted interventions aimed at the beliefs and pain related fear for people with patellofemoral pain. The current consensus that best-evidence treatments consisting of hip and knee strengthening may not be adequate to address the fears and beliefs identified in the current study. Further qualitative research may be warranted on the impact and interpretation of medical terminology commonly used with this patient group, for example, 'weakness' and 'patellar mal-tracking' and its impact and interpretation by patients.

### Trial registration:

ISRCTN 35272486

## Article Summary

### Strengths and limitations of this study:

- This is the first study to use a qualitative method of inquiry on the experience of people living with patellofemoral pain.
- Two authors independently coded all transcripts, and a clear, transparent and reproducible methodological approach was used in the thematic analysis.
- For pragmatic reasons a convenience sampling technique was used.

## Introduction

Patellofemoral pain (PFP) is one of the most common and costly forms of knee pain.<sup>[1-3]</sup> It has an estimated prevalence of 23% in the general population in the UK.<sup>[1]</sup> Symptoms typically include retro-patellar or diffuse peripatellar pain, aggravated by activities that load the joint, such as climbing and descending stairs, squatting and running.<sup>[4]</sup>

Historically PFP has been labelled a “benign, self-limiting condition”, that improves over time with little intervention indicated.<sup>[5]</sup> However, this belief has recently been challenged with data suggesting that the overall long-term prognosis for the majority of patients with PFP is poor.<sup>[6]</sup> Only one third of patients are pain-free one year after diagnosis,<sup>[6]</sup> and 91% still report pain and dysfunction four years post-diagnosis.<sup>[7]</sup> Quantitative data suggests that some patients withdraw from participation in physical activities,<sup>[8,9]</sup> and may develop associated psychological distress, such as fear-avoidance and catastrophising thoughts in relation to their knee pain.<sup>[10-12]</sup>

The biopsychosocial model of persistent pain has recognised that psychological factors, such as fear and catastrophising can, through changes to behaviour, modulate physiological responses to pain with the development and maintenance of persistent pain.<sup>[13-17]</sup> Psychological distress has been identified in low back pain and tendon pain populations through systematic reviews,<sup>[18,19]</sup> and qualitative methods in low back and shoulder populations,<sup>[20-22]</sup> however to our knowledge this has not been investigated in PFP. Advocates of qualitative research methods suggest that qualitative inquiry can disclose the experience of people with pain, and therefore be used to understand patient motivation, social engagement and provide a wealth of information about the sociocultural context to pain.<sup>[23,24]</sup> Contemporary models of persistent pain have identified the importance of thinking beyond muscles and joints,<sup>[25]</sup> and qualitative inquiry can provide an insight that may lead to development of ideas and hypothesis generation within the context of the biopsychosocial model of pain. No study using qualitative methods has been published regarding PFP. Therefore the aim of this study was to give a more detailed account of the experience of people living with PFP, seeking secondary care within the UK.

## Method

In order to address gaps in the literature this research focused on identifying themes within the participants' experience of living with PFP. A qualitative interpretive description design was chosen as an appropriate methodological approach.<sup>[26]</sup> Thematic analysis is the most appropriate method for this type of inquiry, as codes and themes can be created inductively to capture meaning and content without prior preconceptions allowing flexibility to generate a rich and detailed account of the data.<sup>[27]</sup>

In this study, data were analysed thematically using the guidelines set out by Braun and Clarke,<sup>[27]</sup> and was reported in line with the COnsolidated criteria for REporting Qualitative research (COREQ) checklist (see supplementary file 1).<sup>[28]</sup>

Braun and Clarke<sup>[27]</sup> describe a multi-stage approach to thematic data analysis; demonstrating clear distinction of the thematic approach, whilst allowing for the inherent flexibility in the process. They reasoned that a thematic analysis can be conducted from a both realist and constructionist paradigms, although with differing outcomes. A realist approach allows theories about individual motivation and meaning to be developed, since the epistemological position is that there is a unidirectional relationship between meaning, experience and language<sup>[27]</sup>. A constructionist perspective differs, as meaning and experience are socially produced and knowledge a human and social construct; therefore theories about individual motivation and meaning are inappropriate, and theories focus instead on sociocultural contexts<sup>[27]</sup>. This study did not set out to prove or disprove a hypotheses; it set out to generate new data from which an understanding of living with PFP might be developed. The authors wanted to take an epistemological position that recognises the experience at an individual level, and any meanings attached, whilst considering the wider context within a sociocultural perspective. Sitting central on the spectrum of realism and constructivism, this position is described as "contextualist" by Braun and Clarke<sup>[27]</sup>.

## Recruitment

A convenience sample of ten participants with a diagnosis of PFP were recruited from an NHS physiotherapy waiting list. Based on similar studies of other musculoskeletal conditions, we anticipated this sample size would be sufficient to reach data saturation, and was agreed a priori.<sup>[22,29]</sup> Participants were initially contacted by mail and followed up by a telephone call (BES). Thirty four information sheets were sent out, and 24 potential participants were contacted by telephone; two could not make the interview before physiotherapy was due to start; five people physiotherapy had already commenced; one reported resolution of symptoms; and six declined to participate. Inclusion criteria were participants aged 18 to 40 with signs and symptoms of PFP, defined as: anterior or retro-patellar pain reported on at least two of the following activities; prolonged sitting, ascending or descending stairs, squatting, jumping and running.<sup>[4]</sup> These were pre-screened during an initial telephone conversation. Exclusion criteria included: previous knee surgery; awaiting lower limb surgery; knee ligamentous instability; history of patellar dislocation; true knee locking or giving way; reasons to suspect systemic pathology, or acute illness; pregnancy or breast feeding; patellar or iliotibial tract tendinopathy; and those not able to speak or understand English. The exclusion criteria were screened prior to consent being taken (BES).

## Data Collection

1  
2  
3 Participants were offered interviews at their home, or in a hospital-based physiotherapy  
4 department; all opted to be interviewed at the hospital. On arrival the researcher (BES) introduced  
5 himself as a physiotherapist working in that department, and also a researcher conducting a PhD.  
6 The researcher explained the aims of the study. Written consent and verbal consent was taken to  
7 start recording.  
8

9  
10 With reference to previous literature on low back pain, shoulder pain and tendon pain,<sup>[20–22]</sup> semi-  
11 structured interviews were designed by the researchers using a topic guideline with prompts to  
12 explore participants' experience of: living with PFP; past healthcare management; their  
13 interpretation of causation of their pain; beliefs, attitudes and behaviour in relation to their pain and  
14 expectations for the future. The semi-structured interviews allowed for a flexible interview, in a two-  
15 way conversation, allowing new ideas to be developed as they were brought up.  
16

17  
18 The researcher also maintained a reflective journal, noting down initial thoughts and ideas after  
19 each interview.<sup>[22]</sup> This identified that early interviews raised issues about other (past and present)  
20 musculoskeletal pain, and specific coping strategies employed by participants for their PFP. These  
21 were therefore incorporated into subsequent interview schedules.  
22

### 23 **Data Analysis**

24 All audio files were collected and transcribed verbatim (BES). During transcription, initial thoughts  
25 and ideas were noted in the reflective journal. Audio files were listened to several times to check for  
26 accuracy, and transcriptions were read and re-read a number of times; this initial process of data  
27 familiarisation allowed for 'data immersion' by the researchers, and generation of preliminary  
28 ideas.<sup>[27]</sup> Data coding then identified and coded pertinent features of the data giving equal priority  
29 over the whole dataset. These steps were independently conducted by two researchers (BES & FM)  
30 who met to compare codes and develop agreement on the grouping of codes into themes. The  
31 generated themes were reviewed and refined, ensuring that they explained the data in relation to  
32 the coded data, and the whole dataset. The researchers then consulted on the final two stages;  
33 themes and sub-themes were named and defined to demonstrate a clear narrative, using compelling  
34 extracts as illustrations. Consideration was given to each theme individually, but also to how they  
35 related to the dataset as a whole and other themes.<sup>[27]</sup>  
36  
37  
38  
39

40 Data were organised and analysed using QSR International's NVivo 11. After ten interviews, it was  
41 determined by the researchers that data saturation had occurred as no new thoughts or concepts  
42 were generated in the later interviews.  
43  
44  
45  
46  
47  
48  
49  
50  
51  
52  
53  
54  
55  
56  
57  
58  
59  
60



## Results

Participants ranged from 26 to 37 years of age (mean age 30.6), with a diagnosis of PFP for a mean duration of 78 months (range: 3 months to 16 years). For participants' characteristics see table 1. The interviews ranged from 13 to 43 minutes (mean time: 27 minutes).

**Table 1 Characteristics of participants**

| Participant Number | Gender | Age | Duration of symptoms (m) | Type of Employment |
|--------------------|--------|-----|--------------------------|--------------------|
| 1                  | F      | 26  | 60                       | Healthcare Worker  |
| 2                  | M      | 33  | 60                       | Builder            |
| 3                  | M      | 37  | 8                        | Office worker      |
| 4                  | F      | 26  | 192                      | Healthcare Worker  |
| 5                  | F      | 34  | 36                       | Office worker      |
| 6                  | F      | 27  | 84                       | Waitress           |
| 7                  | F      | 28  | 120                      | Technician         |
| 8                  | M      | 29  | 36                       | Office worker      |
| 9                  | F      | 36  | 3                        | Office worker      |
| 10                 | F      | 30  | 180                      | Office worker      |

F, female; M, male; m, months

The first theme that emerged from the data, impact on self, describes the participants' sense of loss, in relation to their self and self-identity. The further themes that emerged describe how the participants deal with this loss in a climate of uncertainty, how they understand or make decisions regarding exercise/activity and pain management, and how they prognosticate for the future. Data are presented to demonstrate the range and meaning to each theme.

### Theme 1: impact on self

Participants offered rich and detailed accounts of the impact and lived experience of PFP. Loss of self and loss of self-identity was evident in the stories told by many of the participants in this study. Self and self-identity are different concepts about ways in which individuals evaluate and interpret themselves; they are nested elements that are shaped by the contexts of individual's lives, with direct influence on decisions and behaviours.<sup>[30]</sup> Self, in its broader sense, can be defined as one's individuality and process of making sense of the world around them; it is a cognitive structure that defines one's sense of worth.<sup>[31]</sup> Self-identity, however, is the cognitive structure of internalised meanings and expectations associated with one's position and role within a social network.<sup>[32]</sup>

Symptoms affected all participants' daily life, with pain being a pervasive and disruptive feature of their day, with resulting loss of physical ability:

*"I struggle at work, bending down to get bottom shelf and getting back up, I literally have to hold onto the table to pull myself up. I can't do it off just my knees." [P7].*

---

“Yeah, well, it's a pain really because I'm walking around. I'm very stiff with that leg. Going up the stairs, down the stairs at work, getting out of a chair, getting into the car.” [P6].

Several participants described the negative impact of PFP on their mental well-being, with subsequent loss of self-identity:

“I would say the reason I got my horse was because I have mental health problems and so having a horse is my routine, structure, thing that I look forward to doing. The positive in my life. And having the knee problem makes that, makes that, not so effective. You can't do, what I imagined I would be able to do.” [P4].

Physical activity has been identified as a key quality of life domain, and the one most affected among patients with persistent pain.<sup>[33]</sup> Loss of activities for these participants included: walking; exercise; driving; holidays; time with family and friends; playing with children; duties at work and kneeling. These loss of activities directly affected participants' role and position within their social network, triggering feelings of loss of self-identity. For example, a number of participants explained how PFP affected their work, and made them question their career aspirations:

“I would say, it makes me like wonder, if I can do the job, not at this point but maybe when I get older and older, maybe I won't be able to do it”. [P4].

Judgemental attitudes from colleagues, friends or family, were described by a number of participants, with subsequent feelings of loss of self-identity, acting as moderators to low moods and feelings of premature ageing:

“They're saying that I'm a grandma. They say, 'Yeah. If you were a horse, they'd put you down (laughter). Just joking me, but obviously, it has affected me in the way that I've had to go out of work to go over to get physio. And I have had this time off, so I don't know if they're a bit, 'Well, it's not that bad.' Because day-to-day I try to be as normal as I can.” [P9].

Loss of significant relationships has emerged as a key aspect of loss in previous studies of patients with persistent pain,<sup>[34–36]</sup> and disruption to important and meaningful relationships was a strong and common theme found in patients with PFP. For example:

“I've missed out of things over the years, spending time with friends, spending time with family and that kind of thing, because I've not been able to do it.” [P6].

As identified by the above extracts, PFP had a compelling and far reaching impact on the participants and their lives. The pain and its disruption to life; loss of self-identity; and loss of relationships were themes that emerged from the data.

## **Theme 2: uncertainty, confusion and sense making**

Confusion and sense making formed a central part in the lives of the participants, with a strong desire from all to elucidate the cause of their pain.

1  
2  
3 *"If I could find out what it was that was causing the pain, then you hope it would be gone*  
4 *within a year. But because we don't really know what's caused it, it's kinda trial and error. So*  
5 *I don't really know."* [P1].  
6

7 The predominant focus of the participants' beliefs and attempts at making sense of their pain was  
8 that biomechanical factors were causative, with individuals trying to link these factors to the  
9 development and maintenance of their pain.  
10

11 *"My running technique or, I'm not sure. I'm not sure about that. I'm not sure. I think that's*  
12 *one thing, maybe something to do with the running technique, or something, or something*  
13 *to do with that."* [P8].  
14  
15

16 Furthermore, confusion was also related to the episodic nature of the symptoms, with participants  
17 attempting to relate 'flare-ups' to the same biomedical factors.  
18

19 A number of participants told stories of structural and biomedical beliefs becoming deep-rooted and  
20 established when reinforced. For example, one participant recounted multiple encounters with  
21 healthcare practitioners that influenced and reinforced her structural belief.  
22  
23

24 *"The work physio guy said to me that he thinks that my heels have maybe gone in which has*  
25 *then pulled my kneecap out of alignment. So instead of going smoothly over the joint where*  
26 *it's supposed to, that it's probably moving over the bone and that's the sharp pain that I'm*  
27 *feeling. Which did make sense because it, like I said, felt like I'd got a rock underneath my*  
28 *kneecap at some stage."* [P9].  
29  
30

31 Some participants remembered biomechanical focused diagnoses they had been given by a  
32 healthcare practitioner they had seen many years in the past; highlighting the power and lasting  
33 influence healthcare practitioners have on their patients. For example one participant remembered  
34 the diagnosis she had received from a healthcare practitioner over 10 years ago:  
35  
36

37 *"I had to go to the hospital once to have x-rays... I don't know if he [doctor] was trying to*  
38 *scare me into doing some exercise or something, but he basically said the only thing they*  
39 *could do is break both of my thighs and twist them a bit and then heal them back together.*  
40 *And it would take me years to get back to walking properly."* [P4].  
41  
42

43 Joint noises are a common feature of normal joint movement,<sup>[22]</sup> however participants commonly  
44 reported distress and confusion at joint noises, often finding healthcare practitioners' explanations  
45 inadequate.  
46

47 *"It was the noise that was concerning me more than the pain. I'm used to hurting. I'm too*  
48 *small to play rugby for a start, and I'd been fighting for 20 years, so, erm, it's one of those,*  
49 *you get used to the pain, but it's just the noise. When you start, you sort of [say] no, that's*  
50 *not right."* [P3].  
51  
52

53 This was in agreement with previous research, which identified negative emotions and inaccurate  
54 etiological beliefs with joint noises in patients with PFP.<sup>[37]</sup>  
55  
56  
57  
58  
59  
60

1  
2  
3 Expressly linked to participants' confusion and need to find the cause of their pain was also a strong  
4 desire to pursue radiological imaging, and feelings of not being taken fully seriously by the  
5 healthcare profession when this was not forthcoming.  
6

7 *"I want to know exactly what the problem is. Obviously, the doctor said, previously going*  
8 *back, they said tendonitis, and now they're saying it's runner's knee or whatever. But you*  
9 *know, it's still like, is that 100%, are you sure that's what it is? Because I was going to ask the*  
10 *doctor to send me for a MRI..." [P8].*  
11  
12

13 Previous research has linked poor outcomes with radiological imaging in populations with low back  
14 pain, suggesting an over use of imaging has a detrimental effect on outcomes.<sup>[38]</sup> There was one  
15 example of the resulting radiological findings compounding the confusion and distrust, for example  
16 Participant Six explained her feelings on a normal MRI finding as:  
17

18 *"I mean I was a bit concerned, because they didn't turn around and say, you have hurt it, but*  
19 *it's not major but this is what you've done, but they didn't actually, they said nothing's*  
20 *wrong, take the knee brace off, and carry on. [I was] almost deflated, because I was like*  
21 *wanting to know why it was hurting, but they weren't explaining any of that to me. So it's a*  
22 *bit like, difficult." [P6].*  
23  
24

25 Another participant's story demonstrates the negative impact of discordance between healthcare  
26 practitioners' diagnosis and advice, further compounding confusion and mistrust:  
27

28 *"Well, it makes you wonder then which one to believe, because I'm like, 'Well okay, he's told*  
29 *me not to do anything until I'm pain-free, because he doesn't want me to aggravate it,' but*  
30 *when, when I came here, and obviously they said that it would probably be best to start*  
31 *putting an impact on it again ... "* [P9].  
32  
33

34 The sense-making processes that participants described were established from past experience of  
35 healthcare treatment, past experience of pain and cultural beliefs around structure and pain.  
36

### 37 **Theme 3: exercise and activity beliefs**

  
38

39 All participants identified specific beliefs regarding barriers to exercise and activity. These were  
40 informed by factors relating to: diagnosis uncertainty; cultural beliefs around pain; fear-avoidant  
41 behaviours and the iatrogenic effect of healthcare.  
42

43 Diagnosis uncertainty, contributed to participants' beliefs regarding exercise and activity. In  
44 particular, it underpinned a dilemma regarding the relationship between activity and potential harm:  
45

46 *"It's 'are you making it worse?' And that's the crux of it really. As I'm doing it and thinking, 'if*  
47 *this is hurting, should I really be doing this, or shall I pack this in and do something else?' But*  
48 *it's the not knowing ... "* [P5].  
49  
50

51 Cultural beliefs around pain being a direct sign of tissue damage was evident in a large proportion of  
52 the participants' narratives, resulting in negative behaviour towards exercise and activity.  
53

54 *"...with me it's always been, if something hurt it because your body's telling you if you do*  
55 *that you're going to cause more injury. You'll make things worse." [P6].*  
56  
57  
58  
59  
60

1  
2  
3 Associated with the cultural beliefs on pain and damage was the resultant fear-avoidant behaviour.  
4 Participants, frequently contradicted themselves however; many participants would express the  
5 sentiment that they would not let the pain stop them from doing what they wanted to do, yet  
6 demonstrated clear activity withdrawal.  
7

8 *“So for example, we went to [holiday resort] last year; on your feet all day, walking miles and*  
9 *miles, I would be, like, in tears by the end of the day. I wouldn’t let it stop me the next day*  
10 *because I would be, like, I’m doing this” [P4].*  
11

12  
13 *“When I was in [holiday resort]; a couple of days I didn’t go out and I stayed back at the*  
14 *hotel. Because I couldn’t do it, I needed to rest.” [P4].*  
15

---

16  
17  
18  
19 A predominant sub-theme was the association of sport and exercise, even in the absence of pain, as  
20 a potential precursor to future joint pain and ‘damage’. Some participants attributed their current  
21 PFP to past sporting activities, despite no obvious mechanisms of injury.  
22

23 *“Yeah. Obviously it stems from doing long distance running.” [P7].*  
24

25 A number of participants discussed the direct impact of healthcare practitioner’s advice and  
26 diagnosis labelling on their exercise and activity levels, suggesting an iatrogenic effect of healthcare  
27 for PFP patients.  
28

29 *“I have been told by doctors before I shouldn’t run because it would jar my knee and*  
30 *shouldn’t run or walk on an uneven surface because it will wonk my knee from side to side.”*  
31 *[P4].*  
32

---

33  
34  
35 *“But then when I started the physio at work and he told me that I shouldn’t walk or that I*  
36 *shouldn’t swim because he just wanted to obviously manipulate it and get me pain-free*  
37 *before I did anything that could possibly aggravate it. So I stopped.” [P9].*  
38  
39

40 This theme identified a number of beliefs associated as a barrier to activity and exercise  
41 engagement. These included diagnosis uncertainty; cultural beliefs around pain; fear-avoidant  
42 behaviours and the iatrogenic effect of healthcare.  
43

#### 44 **Theme 4: behavioural coping strategies**

45

46  
47 A central coping strategy for participants of this study was the concept of rest. Many of them  
48 associated rest, and avoidance of activity, with the idea that time was necessary for the healing  
49 process, and that aggravating activities should be avoided.  
50

51 *“I try, obviously, sit down as much as I can.” [P4].*  
52

53 One participant expressed an expectation that healthcare professionals would advise him not to  
54 continue with activity and exercise:  
55

56 **R:** *So you think physios would say no [to keep physically active]?*  
57  
58  
59  
60

1  
2  
3 **P8:** *Physios would probably say no. Yeah, you shouldn't do it.*

4  
5 Another common coping strategy was postural adjustments; participants often talked of preferred  
6 sitting positions in relation to knee flexion.

7  
8 In keeping with previous research on the high levels of analgesic use in patients with PFP,<sup>[7]</sup> a  
9 common narrative shared with participants was the use of analgesics, with some acknowledging  
10 they were not effective.

11  
12 *"I have had some strong painkillers from the doctors. They gave me some naproxen and  
13 some codeine to manage it when it was at its worst but I try not to take them."* [P9].

14  
15 The use of knee supports was also common in the self-management strategies employed by the  
16 participants.

17  
18 *"If it hurts, it hurts. I'll try and strap my knee up. Because if I know I'm going harder in like  
19 gym classes, I'll strap my knees up before I go. And then when I get too much pain, I'll stop  
20 the exercise."* [P10].

## 21 22 23 24 **Theme 5: expectations of the future**

25 A number of participants expressed views, which could be contextualised as an external locus of  
26 control, with expectations of passive physiotherapeutic treatment options.

27  
28 *"I would presume manipulation of muscles groups, joints and tendons."* [P3].

29  
30 Even though the majority of participants expressed negative views about the future, they all  
31 expressed a desire to be pain free, over and above any functional improvements.

32  
33 **R:** *With the physio, what would you class as a success?*

34  
35 **P8:** *Getting rid of the pain.*

36  
37  
38 Nine of the ten participants held negative beliefs about the future; particularly in relation to  
39 prognostic prediction following their referral to physiotherapy.

40  
41 *"But then when I'm going up the stairs and it hurts it does concern me that it's going to be  
42 every day for the rest of my life I'm going to be struggling to walk upstairs. And then I think  
43 about getting old, and I think I'm going to end up with a stair lift and living downstairs and  
44 that sort of thing."* [P1].

45  
46  
47  
48  
49 *"[the pain is] definitely preying on my mind. Is it gonna stop me from going into the police, is  
50 that gonna stop me doing the things I want to do later on in life? So yeah, it does prey on my  
51 mind a little bit."* [P6].

52  
53 Central to their negative beliefs about the future and their prognosis was low self-efficacy.  
54 Participants felt they had very little control over their symptoms.

1  
2  
3 *"[In] my head, my thought process is I just hate it. Do an operation. Get rid of it. In my head,*  
4 *and obviously not being from the medical profession, but I'm just like, "Just get rid of the pain*  
5 *however it can be done." [P8].*  
6  
7

---

8  
9 *"Yes, I'm 37 now and they feel older than that. You just get that feeling, don't you, I've*  
10 *bounced back from lots of injuries before but this is the one that is making me think. You*  
11 *know, when this gets cold I can feel it, and thinking there's already arthritis there, I'm in*  
12 *trouble, it sets the brain going." [P3].*  
13  
14

---

15  
16  
17 Low expectation of physiotherapy, and past physiotherapy failed treatments were also a core theme  
18 within future expectations.

19  
20 **R:** *Have you got any expectations of what might happen when you walk in to see the physio?*

21  
22 **P10:** *I expect them to turn around and say physio can't help.*  
23

---

24  
25  
26 *"When I did get the physiotherapy it kinda didn't really do anything anyway. So it just made*  
27 *me think, it's pointless, 'cause they was trying to remove the fluid from out my knee, that like*  
28 *I say, made it worse to begin with. She did say your knees will feel sore, but it went back to*  
29 *how it was anyway, so, it just seemed like a pointless process." [P7].*  
30

31  
32 There was one exception, with one participant having positive outlook to the future and their  
33 physiotherapy referral.

34  
35 *"Oh yeah, I think it will get better. Yeah, I'd go for the better option." [P9].*  
36

37 The main sub-themes that emerged under the future were: beliefs that their pain will get worse;  
38 external locus of control with regards to treatment; low self-efficacy; poor opinion of physiotherapy  
39 and previous failed physiotherapy treatments and an overwhelming desire to be pain free, over and  
40 above any practical goals for rehabilitation.  
41

## 42 43 **Discussion**

### 44 45 **Main Findings**

46  
47 Quantitative research methodologies dominate the literature for PFP. This is the first study to use a  
48 qualitative method of inquiry to gain data on the experiences of people living with PFP. The five  
49 major themes that emerged from the data were: (1) impact on self; (2) uncertainty, confusion and  
50 sense making; (3) exercise and activity beliefs; (4) behavioural coping strategies and (5) expectations  
51 of the future.  
52

53  
54 A key finding of this study is that loss of physical ability is profound and considerable, and plays a  
55 significant role in participants' lives; despite previous research suggesting that PFP is a benign and  
56  
57  
58  
59

1  
2  
3 self-limiting condition.<sup>[5]</sup> An inability to continue with significant and meaningful activities has been  
4 identified as a cause of anxiety in people with persistent pain.<sup>[39]</sup> Persistent pain interrupts behaviour  
5 and a person's self-identity by affecting a sense of who they are, and what they might become.<sup>[40]</sup> As  
6 a result, lives are socially and environmentally restricted by persistent interruptions, or an inability  
7 to complete, or even attempt important tasks and activities.<sup>[40]</sup> With changes and loss of  
8 participants' position and role, for example with employment or family duties, the internalised  
9 meanings and expectations associated with one's self-identity is further threatened.<sup>[32]</sup>  
10  
11

12 Participants expressed intense confusion around their pain and symptoms. For instance, the  
13 causative reasons were elusive and troubling, as too was the ability to predict and control the pain  
14 intensity; and any attempts that participants made at understanding were firmly within the  
15 biomechanical sphere of reasoning. An inability to make sense of pain, and the process associated  
16 with sense-making and pain-related fear has been proposed in low back pain populations.<sup>[41]</sup>  
17 Previous research has identified that an inability to make sense of pain places 'lives on hold',<sup>[42]</sup> and  
18 may lead to more 'catastrophising'.<sup>[43]</sup>  
19  
20

21 There remains scientific debate and uncertainty around the underlying aetiology of PFP,<sup>[44]</sup> and there  
22 is a large variation in the way PFP is managed by physiotherapists in the UK.<sup>[45]</sup> The majority of  
23 participants in this study had previous experience of healthcare management for PFP suggesting that  
24 variation in healthcare treatment may have a negative impact on the patients' lived experience.  
25 Historically the biomedical model of pain establishes a direct relationship between tissue structure  
26 and pain,<sup>[46]</sup> and participants characteristically attributed their pain to structure and/or anatomical  
27 problems. However several studies have recently demonstrated that structural abnormalities of the  
28 patellofemoral joint on Magnetic Resonance Imaging (MRI) are not associated with PFP.<sup>[47,48]</sup> Three  
29 participants had no previous healthcare management for PFP, but nevertheless gave a  
30 biomechanical/structural cause for their pain; all three had previous physiotherapy for other pain  
31 conditions, including back, hips and ankles. This may suggest that exposure to biomechanical  
32 approaches to the management of musculoskeletal pain in general could, potentially, have a  
33 carryover to other locations of pain, with a negative effect.  
34  
35  
36

37 The iatrogenic effect of healthcare is an emerging field of research in the low back pain population  
38 <sup>[38,49]</sup>. This study is the first to find such a theme in patients with PFP. These findings are consistent  
39 with recent research that showed that the majority of UK physiotherapists would advise their  
40 patients not to continue with exercises if they experienced any pain.<sup>[45]</sup> The fear-avoidance model of  
41 pain is a well-established with patients with persistent pain, particularly persistent low back pain,<sup>[17]</sup>  
42 additionally research has shown that fear-avoidance behaviour may also exist with clinicians.<sup>[25,45,50]</sup>  
43 The central concept of the model is cognitions and emotions that underpin fear of the pain; fears  
44 about potential physical activities exacerbating the pain and further 'damaging' bodies. The fear  
45 leads to safety seeking behaviours and hypervigilance that paradoxically maintains or exacerbates  
46 the pain and disability.<sup>[22]</sup> In contrast, if pain is perceived in a non-threatening way patients are likely  
47 to maintain physical activity levels, through which recovery can be achieved.<sup>[51,52]</sup> All of the ten  
48 participants in this study described fear-avoidant behaviour at some stage of their interview. This is  
49 the first study, which we know of, that identifies this behaviour in patients with a diagnosis of PFP.  
50  
51  
52

53 Patellofemoral pain is often described as an 'overuse' injury,<sup>[53]</sup> and these data seem to be consistent  
54 with the patients' belief and behaviour with a definition more aligned with the English language  
55 meaning of 'overuse'. Contemporary thinking in relation to injury risk challenges the idea that PFP is  
56  
57  
58  
59



1  
2  
3 simply an 'overuse' injury, with evidence suggesting that persistent and long-term under-use may be  
4 a risk factor, with consistent exposure to tissue load being considered one method of  
5 management.<sup>[54]</sup> The fear-avoidant behaviours revealed within this study would therefore be seen  
6 as negative pain behaviour, with long-term detrimental consequences.  
7

8  
9 A key finding of this research is the low expectation for the future and low self-efficacy  
10 demonstrated by the majority of the participants that could be conceptualised as 'catastrophising'.  
11 Catastrophising is conceptually within the same model of pain behaviour as fear-avoidance, with  
12 largescale overlap.<sup>[19]</sup> Low self-efficacy, fear of the future and catastrophising is a common finding in  
13 patients with persistent pain.<sup>[24,55]</sup> The National Institute of Health and Care Excellence describes  
14 pain as a complex biopsychosocial issue, associated with expectations, self-efficacy, mood and  
15 coping abilities.<sup>[56]</sup> In addition, it has been shown that self-efficacy is a strong predictor of successful  
16 outcome, irrespective of the intervention delivered, for patients with persistent pain; suggesting  
17 that rehabilitation programmes for persistent musculoskeletal pain should be designed with the aim  
18 of improving self-efficacy.<sup>[57]</sup>  
19  
20

## 21 **Clinical and research implications**

22 This study established that a sample of patients with PFP demonstrated: pain-related fear, such as  
23 fear-avoidance; damage beliefs; difficulty with making sense of their pain; low self-efficacy and fear  
24 of the future.  
25  
26

27 The current consensus that best evidence treatments consisting of hip and knee strengthening may  
28 not be adequate to address the fears and beliefs identified in the current study. Future studies are  
29 needed to explore biopsychosocial targeted interventions for this population, particularly in relation  
30 to pain experienced by patients during exercise, followed by efficacy and effectiveness trials.  
31 Interventions may be patient education packages and self-management strategies targeting self-  
32 efficacy and physical activity. Furthermore, future qualitative work will be beneficial to understand  
33 the role of medical terminology commonly used with this patient group, for example, 'weakness'  
34 and 'patellar mal-tracking',<sup>[45]</sup> and its impact and interpretation by patients.  
35  
36  
37

## 38 **Study limitations and strengths**

39 Two authors independently coded all transcripts, and this study employed a clear, transparent and  
40 reproducible methodological approach to data analysis. The authors make it clear that their clinical  
41 and research experience lie within the biopsychosocial framework of musculoskeletal pain and this  
42 study forms part of a larger body of research looking at pain education, self-management strategies  
43 and exercise interventions for individuals with PFP.<sup>[58]</sup> It is worth noting that the interviewer made it  
44 explicit to the participants that he was a physiotherapist working in the department conducting the  
45 research; indeed a number of them did proceed to ask clinical questions about their condition,  
46 highlighting a power dynamic between the interviewer and participant. Furthermore, it is important  
47 to note that recruitment took place in the same department that the researcher was working as a  
48 physiotherapist. This may, in part, have influenced participants' inclination to take part, and also  
49 their responses.  
50  
51  
52

53 The main limitation of this study is that for pragmatic reasons a convenience sampling technique  
54 was used. It is possible that this sample may differ from other samples within the UK, and how  
55 representative these findings are to the greater population of individuals with PFP is unknown. A  
56  
57  
58  
59

purposive sampling technique may have better represented sociodemographic groups, or targeted identifiable subgroups.

## Conclusion

These findings offer an insight into the experience of individuals living with PFP. Previous literature have focused on pain and biomechanics, rather than the individual experience, attached meanings and any wider context within a sociocultural perspective. The participants provided rich and detailed narratives of loss of physical and functional ability; loss of self-identity; pain related confusion and difficulty making sense of their pain; pain-related fear, including fear-avoidance and 'damage' beliefs; inappropriate coping strategies and fear of the future. Our findings suggest future research is warranted into biopsychosocial targeted interventions and the impact and interpretation of medical terminology.

## Authors' contributions

BES was responsible for conception and design, compiling the interview schedule, interviewing, transcribing, coding, analysis and interpretation, drafting and revising the manuscript. FM was responsible for conception and design, compiling the interview schedule, coding, analysis and interpretation, drafting and revising the manuscript. PH, MB, JS, MR, TS and PL were involved in conception and design, interpretation and reviewing revisions to the manuscript. All authors have read and approved of the final manuscript.

## Funding

This report is independent research arising from a Clinical Doctoral Research Fellowship, Benjamin Smith, ICA-CDRF-2015-01-002 supported by the National Institute for Health Research (NIHR) and Health Education England (HEE). The views expressed in this publication are those of the author(s) and not necessarily those of the NHS, the NIHR, HEE or the Department of Health.

## Competing interests

The authors declare that they have no competing interests.

## Ethics approval

This study was approved by the West Midlands - Black Country Research Ethics Committee (16/WM/0414).

## Availability of data

Quotations and further details are available from Benjamin Smith at [benjamin.smith3@nhs.net](mailto:benjamin.smith3@nhs.net)

## Supplementary Data

Data supplement 1 – Code Book

## References

- 1 Dey P, Callaghan M, Cook N, *et al.* A questionnaire to identify patellofemoral pain in the community: an exploration of measurement properties. *BMC Musculoskelet Disord* 2016;17:237. doi:10.1186/s12891-016-1097-5
- 2 Urwin M, Symmons D, Allison T, *et al.* Estimating the burden of musculoskeletal disorders in the community: the comparative prevalence of symptoms at different anatomical sites, and the relation to social deprivation. *Ann Rheum Dis* 1998;57:649–55.
- 3 Jordan KP, Kadam UT, Hayward R, *et al.* Annual consultation prevalence of regional musculoskeletal problems in primary care: an observational study. *BMC Musculoskelet Disord* 2010;11:144. doi:10.1186/1471-2474-11-144
- 4 Crossley KM, Stefanik JJ, Selfe J, *et al.* 2016 Patellofemoral pain consensus statement from the 4th International Patellofemoral Pain Research Retreat, Manchester. Part 1: Terminology, definitions, clinical examination, natural history, patellofemoral osteoarthritis and patient-reported outcome m. *Br J Sports Med* 2016;50:839–43.
- 5 Sandow MJ, Goodfellow JW. The natural history of anterior knee pain in adolescents. *J Bone Joint Surg Br* 1985;67:36–8.
- 6 Collins NJ, Bierma-Zeinstra SMA, Crossley KM, *et al.* Prognostic factors for patellofemoral pain: a multicentre observational analysis. *Br J Sports Med* 2013;47:227–33. doi:10.1136/bjsports-2012-091696
- 7 Stathopulu E, Baildam E. Anterior knee pain: a long-term follow-up. *Rheumatology (Oxford)* 2003;42:380–2.
- 8 Rathleff MS, Rasmussen S, Olesen JL. Unsatisfactory long-term prognosis of conservative treatment of patellofemoral pain syndrome. *Ugeskr Laeger* 2012;174:1008–13.
- 9 Smith BE, Hendrick P, Logan P. Patellofemoral pain: Challenging current practice - A case report. *Man Ther* 2016;22:216–9. doi:10.1016/j.math.2015.09.002
- 10 Doménech J, Sanchis-Alfonso V, López L, *et al.* Influence of kinesiophobia and catastrophizing on pain and disability in anterior knee pain patients. *Knee Surgery, Sport Traumatol Arthrosc* 2013;21:1562–8. doi:10.1007/s00167-012-2238-5
- 11 Piva SR, Fitzgerald GK, Wisniewski S, *et al.* Predictors of pain and function outcome after rehabilitation in patients with patellofemoral pain syndrome. *J Rehabil Med* 2009;41:604–12. doi:10.2340/16501977-0372

- 1  
2  
3 12 Piva SR, Fitzgerald GK, Irrgang JJ, *et al.* Associates of Physical Function and Pain in Patients  
4 with Patellofemoral Pain Syndrome. *Arch Phys Med Rehabil* 2009;90:285–95.  
5 doi:10.1016/j.apmr.2008.08.214  
6  
7  
8 13 Quartana PJ, Campbell CM, Edwards RR. Pain catastrophizing: a critical review. *Expert Rev*  
9 *Neurother* 2009;9:745–58. doi:10.1586/ern.09.34  
10  
11  
12 14 Moseley GL, Arntz A. The context of a noxious stimulus affects the pain it evokes. *PAIN*<sup>®</sup>  
13 2007;133:64–71.  
14  
15  
16 15 Harvie DS, Broecker M, Smith RT, *et al.* Bogus visual feedback alters onset of movement-  
17 evoked pain in people with neck pain. *Psychol Sci* 2015;:0956797614563339.  
18  
19  
20 16 Lobanov O V, Zeidan F, McHaffie JG, *et al.* From cue to meaning: Brain mechanisms  
21 supporting the construction of expectations of pain. *PAIN*<sup>®</sup> 2014;155:129–36.  
22  
23  
24 17 Chou R, Shekelle P. Will this patient develop persistent disabling low back pain? *JAMA*  
25 2010;303:1295–302. doi:10.1001/jama.2010.344  
26  
27  
28 18 Mallows A, Debenham J, Walker T, *et al.* Association of psychological variables and outcome  
29 in tendinopathy: a systematic review. *Br J Sports Med* 2016;:bjsports – 2016.  
30  
31  
32 19 Wertli MM, Rasmussen-Barr E, Weiser S, *et al.* The role of fear avoidance beliefs as a  
33 prognostic factor for outcome in patients with nonspecific low back pain: a systematic  
34 review. *spine J* 2014;14:816–36.  
35  
36  
37 20 Osborn M, Smith JA. The personal experience of chronic benign lower back pain: An  
38 interpretative phenomenological analysis. *Br J Pain* 2015;9:65–83.  
39  
40  
41 21 Smith JA, Osborn M. Pain as an assault on the self: An interpretative phenomenological  
42 analysis of the psychological impact of chronic benign low back pain. *Psychol Heal*  
43 2007;22:517–34.  
44  
45  
46 22 Jones S, Hanchard N, Hamilton S, *et al.* A qualitative study of patients' perceptions and  
47 priorities when living with primary frozen shoulder. *BMJ Open* 2013;3:e003452.  
48  
49  
50 23 Walker J, Holloway I, Sofaer B. In the system: the lived experience of chronic back pain from  
51 the perspectives of those seeking help from pain clinics. *Pain* 1999;80:621–8.  
52  
53  
54 24 Walker J, Sofaer B, Holloway I. The experience of chronic back pain: accounts of loss in those  
55 seeking help from pain clinics. *Eur J Pain* 2006;10:199.  
56  
57  
58  
59

- 1  
2  
3 25 Nijs J, Roussel N, Paul van Wilgen C, *et al.* Thinking beyond muscles and joints: Therapists' and patients' attitudes and beliefs regarding chronic musculoskeletal pain are key to applying effective treatment. *Man Ther* 2013;18:96–102.  
4  
5  
6  
7  
8 26 Thorne S, Kirkham SR, MacDonald-Emes J. Focus on qualitative methods. Interpretive description: a noncategorical qualitative alternative for developing nursing knowledge. *Res Nurs Health* 1997;20:169–77.  
9  
10  
11  
12  
13 27 Braun V, Clarke V. Using thematic analysis in psychology. *Qual Res Psychol* 2006;3:77–101.  
14  
15  
16 28 Tong A, Sainsbury P, Craig J. Consolidated criteria for reporting qualitative research (COREQ): a 32-item checklist for interviews and focus groups. *Int J Qual Heal care* 2007;19:349–57.  
17  
18  
19 29 Mc Auliffe S, Synott A, Casey H, *et al.* Beyond the tendon: Experiences and perceptions of people with persistent Achilles tendinopathy. *Musculoskelet Sci Pract* 2017;29:108–14.  
20  
21  
22  
23 30 Leary MR, Tangney JP. *Handbook of self and identity*. Guilford Press 2011.  
24  
25  
26 31 Baumeister RF. *The self in social psychology*. 1999.  
27  
28  
29 32 Stryker S, Burke PJ. The past, present, and future of an identity theory. *Soc Psychol Q* 2000;:284–97.  
30  
31  
32  
33 33 Lamé IE, Peters ML, Vlaeyen JWS, *et al.* Quality of life in chronic pain is more associated with beliefs about pain, than with pain intensity. *Eur J Pain* 2005;9:15–24.  
34  
35  
36  
37 34 Aldrich S, Eccleston C. Making sense of everyday pain. *Soc Sci Med* 2000;50:1631–41.  
38  
39  
40 35 Charmaz K. From the 'sick role' to stories of self: Understanding the self in illness. *Rutgers Ser Self Soc Identity* 1999;2:209–39.  
41  
42  
43  
44 36 Johansson EE, Hamberg K, Westman G, *et al.* The meanings of pain: an exploration of women's descriptions of symptoms. *Soc Sci Med* 1999;48:1791–802.  
45  
46  
47  
48 37 Robertson CJ, Hurley M, Jones F. People's beliefs about the meaning of crepitus in patellofemoral pain and the impact of these beliefs on their behaviour: A qualitative study. *Musculoskelet Sci Pract* 2017;28:59–64. doi:10.1016/j.msksp.2017.01.012  
49  
50  
51  
52 38 Webster BS, Bauer AZ, Choi Y, *et al.* Iatrogenic consequences of early magnetic resonance imaging in acute, work-related, disabling low back pain. *Spine (Phila Pa 1976)* 2013;38:1939–46.  
53  
54  
55  
56  
57  
58  
59  
60

- 1  
2  
3 39 Roy R. *Chronic pain, loss and suffering*. University of Toronto Press 2004.  
4  
5  
6 40 Harris S, Morley S, Barton SB. Role loss and emotional adjustment in chronic pain. *Pain*  
7 2003;105:363–70.  
8  
9  
10 41 Bunzli S, Smith A, Schütze R, *et al*. Beliefs underlying pain-related fear and how they evolve: a  
11 qualitative investigation in people with chronic back pain and high pain-related fear. *BMJ*  
12 *Open* 2015;5.  
13  
14  
15 42 Bunzli S, Watkins R, Smith A, *et al*. Lives on hold: a qualitative synthesis exploring the  
16 experience of chronic low-back pain. *Clin J Pain* 2013;29:907–16.  
17  
18  
19 43 van Wilgen CP, van Ittersum MW, Kaptein AA, *et al*. Illness perceptions in patients with  
20 fibromyalgia and their relationship to quality of life and catastrophizing. *Arthritis Rheum*  
21 2008;58:3618–26.  
22  
23  
24 44 Doménech J, Sanchis-Alfonso V, Espejo BBB, *et al*. Changes in catastrophizing and  
25 kinesiophobia are predictive of changes in disability and pain after treatment in patients with  
26 anterior knee pain. *Knee Surg Sports Traumatol Arthrosc* 2014;22:2295–300.  
27 doi:10.1007/s00167-014-2968-7  
28  
29  
30 45 Smith BE, Hendrick P, Bateman M, *et al*. Current Management Strategies for Patellofemoral  
31 Pain: An online survey of 99 practising UK physiotherapists. *BioMed Cent Musculoskelet*  
32 *Disord* 2017;18. doi:10.1186/s12891-017-1539-8  
33  
34  
35 46 Doménech J, Sanchis-Alfonso V, Espejo B. Influence of Psychological Factors on Pain and  
36 Disability in Anterior Knee Pain Patients. In: *Anterior Knee Pain and Patellar Instability*.  
37 London: : Springer London 2011. 123–35. doi:10.1007/978-0-85729-507-1\_9  
38  
39  
40 47 van der Heijden RA, Oei EHG, Bron EE, *et al*. No Difference on Quantitative Magnetic  
41 Resonance Imaging in Patellofemoral Cartilage Composition Between Patients With  
42 Patellofemoral Pain and Healthy Controls. *Am J Sports Med* 2016;44:1172–8.  
43 doi:10.1177/0363546516632507  
44  
45  
46 48 van der Heijden RA, de Kanter JLM, Bierma-Zeinstra SMA, *et al*. Structural Abnormalities on  
47 Magnetic Resonance Imaging in Patients With Patellofemoral Pain: A Cross-sectional Case-  
48 Control Study. *Am J Sports Med* 2016;44:2339–46. doi:10.1177/0363546516646107  
49  
50  
51 49 Lin IB, O’Sullivan PB, Coffin JA, *et al*. Disabling chronic low back pain as an iatrogenic disorder:  
52 a qualitative study in Aboriginal Australians. *BMJ Open* 2013;3:1–8.  
53  
54  
55 50 Littlewood C, Lowe A, Moore J. Rotator cuff disorders: a survey of current UK physiotherapy  
56 practice. *Shoulder Elb* 2012;4:64–71. doi:10.1111/j.1758-5740.2011.00164.x  
57  
58  
59

- 1  
2  
3 51 Leeuw M, Goossens MEJB, Linton SJ, *et al*. The fear-avoidance model of musculoskeletal pain:  
4 current state of scientific evidence. *J Behav Med* 2007;30:77–94. doi:10.1007/s10865-006-  
5 9085-0  
6  
7  
8 52 Vlaeyen JW, Linton SJ. Fear-avoidance and its consequences in chronic musculoskeletal pain:  
9 a state of the art. *Pain* 2000;85:317–32.  
10  
11  
12 53 Herrington L, Nester C. Q-angle undervalued? The relationship between Q-angle and medio-  
13 lateral position of the patella. *Clin Biomech (Bristol, Avon)* 2004;19:1070–3.  
14 doi:10.1016/j.clinbiomech.2004.07.010  
15  
16  
17 54 Gabbett TJ. The training-injury prevention paradox: should athletes be training smarter and  
18 harder? *Br J Sports Med* 2016;50:273–80. doi:10.1136/bjsports-2015-095788  
19  
20  
21 55 Arnstein P, Caudill M, Mandle CL, *et al*. Self efficacy as a mediator of the relationship between  
22 pain intensity, disability and depression in chronic pain patients. *Pain* 1999;80:483–91.  
23  
24  
25 56 National Institute for Clinical Excellence. Osteoarthritis: care and management. 2014.  
26  
27  
28 57 Miles CL, Pincus T, Carnes D, *et al*. Can we identify how programmes aimed at promoting self-  
29 management in musculoskeletal pain work and who benefits? A systematic review of sub-  
30 group analysis within RCTs. *Eur J Pain* 2011;15. doi:10.1016/j.ejpain.2011.01.016  
31  
32  
33 58 Smith BE, Hendrick P, Bateman M, *et al*. Study protocol: a mixed methods feasibility study for  
34 a loaded self-managed exercise programme for patellofemoral pain. *Pilot Feasibility Stud*  
35 2017;4. doi:10.1186/s40814-017-0167-2  
36  
37  
38  
39  
40  
41  
42  
43  
44  
45  
46  
47  
48  
49  
50  
51  
52  
53  
54  
55  
56  
57  
58  
59  
60

## Data supplement 1 – Code Book

Name

### Impact on self, sense of loss

Name

Pain experiences, disruption to life, distressing

Loss of identity, self

Relationships loss (time with family, friends, children, friends making fun, judgement)

Knee noises experiences, distressing

### Not understanding, sense making, confusion

Name

Trying to find cause

Anatomy and imaging central to causation

Historical diagnosis – i.e historical comments still central to beliefs

Distrust of healthcare – wanting scans

Not being taken seriously

Disagreement with healthcare increases uncertainty and distress

### Exercise and Activity Barriers

Name

Diagnosis uncertainty

Cultural beliefs around pain

Fear avoidance

Iatrogenic effect of healthcare

Sport = future 'damage'

Physio = exercise

contradiction

### Coping Strategies

Name

Central to coping is activity avoidance – despite saying they don't let it stop them

Postural adjustments

Rest

Analgesics – whilst acknowledging they don't work

Reliance on knee support – not knowing how they work

### The Future

Name

Belief will get worse

Effect of healthcare on that belief (including external locus of control)

Low self-efficacy

Low opinion of physio, past physio failures

Desire to be pain free

high expectation of prognosis



## Consolidated criteria for reporting qualitative studies (COREQ): 32-item checklist

Developed from:

Tong A, Sainsbury P, Craig J. Consolidated criteria for reporting qualitative research (COREQ): a 32-item checklist for interviews and focus groups. *International Journal for Quality in Health Care*. 2007. Volume 19, Number 6: pp. 349 – 357

**YOU MUST PROVIDE A RESPONSE FOR ALL ITEMS. ENTER N/A IF NOT APPLICABLE**

| No. Item                                       | Guide questions/description                                                                                                                              | Reported on Page # |
|------------------------------------------------|----------------------------------------------------------------------------------------------------------------------------------------------------------|--------------------|
| <b>Domain 1: Research team and reflexivity</b> |                                                                                                                                                          |                    |
| <i>Personal Characteristics</i>                |                                                                                                                                                          |                    |
| 1. Interviewer/facilitator                     | Which author/s conducted the interview or focus group?                                                                                                   | Page 5             |
| 2. Credentials                                 | What were the researcher's credentials?<br>E.g. PhD, MD                                                                                                  | Page 5             |
| 3. Occupation                                  | What was their occupation at the time of the study?                                                                                                      | Page 5             |
| 4. Gender                                      | Was the researcher male or female?                                                                                                                       | Page 5             |
| 5. Experience and training                     | What experience or training did the researcher have?                                                                                                     | Page 5             |
| <i>Relationship with participants</i>          |                                                                                                                                                          |                    |
| 6. Relationship established                    | Was a relationship established prior to study commencement?                                                                                              | Page 5             |
| 7. Participant knowledge of the interviewer    | What did the participants know about the researcher? e.g. personal goals, reasons for doing the research                                                 | Page 5             |
| 8. Interviewer characteristics                 | What characteristics were reported about the interviewer/facilitator? e.g. Bias, assumptions, reasons and interests in the research topic                | Page 5 & 15        |
| <b>Domain 2: study design</b>                  |                                                                                                                                                          |                    |
| <i>Theoretical framework</i>                   |                                                                                                                                                          |                    |
| 9. Methodological orientation and Theory       | What methodological orientation was stated to underpin the study? e.g. grounded theory, discourse analysis, ethnography, phenomenology, content analysis | Page 5             |
| <i>Participant selection</i>                   |                                                                                                                                                          |                    |
| 10. Sampling                                   | How were participants selected? e.g. purposive, convenience, consecutive, snowball                                                                       | Page 5             |
| 11. Method of approach                         | How were participants approached? e.g. face-to-face, telephone, mail, email                                                                              | Page 5             |
| 12. Sample size                                | How many participants were in the study?                                                                                                                 | Page 5             |

|                                        |                                                                                                                                 |            |
|----------------------------------------|---------------------------------------------------------------------------------------------------------------------------------|------------|
| 13. Non-participation                  | How many people refused to participate or dropped out? Reasons?                                                                 | Page 5     |
| <i>Setting</i>                         |                                                                                                                                 |            |
| 14. Setting of data collection         | Where was the data collected? e.g. home, clinic, workplace                                                                      | Page 5     |
| 15. Presence of non-participants       | Was anyone else present besides the participants and researchers?                                                               | Page 5     |
| 16. Description of sample              | What are the important characteristics of the sample? e.g. demographic data, date                                               | Page 7     |
| <i>Data collection</i>                 |                                                                                                                                 |            |
| 17. Interview guide                    | Were questions, prompts, guides provided by the authors? Was it pilot tested?                                                   | Page 5     |
| 18. Repeat interviews                  | Were repeat inter views carried out? If yes, how many?                                                                          | N/A        |
| 19. Audio/visual recording             | Did the research use audio or visual recording to collect the data?                                                             | Page 5     |
| 20. Field notes                        | Were field notes made during and/or after the inter view or focus group?                                                        | Page 5 & 6 |
| 21. Duration                           | What was the duration of the inter views or focus group?                                                                        | Page 7     |
| 22. Data saturation                    | Was data saturation discussed?                                                                                                  | Page 6     |
| 23. Transcripts returned               | Were transcripts returned to participants for comment and/or correction?                                                        | N/A        |
| <b>Domain 3: analysis and findings</b> |                                                                                                                                 |            |
| <i>Data analysis</i>                   |                                                                                                                                 |            |
| 24. Number of data coders              | How many data coders coded the data?                                                                                            | Page 6     |
| 25. Description of the coding tree     | Did authors provide a description of the coding tree?                                                                           | N/A        |
| 26. Derivation of themes               | Were themes identified in advance or derived from the data?                                                                     | Page 6     |
| 27. Software                           | What software, if applicable, was used to manage the data?                                                                      | NVivo      |
| 28. Participant checking               | Did participants provide feedback on the findings?                                                                              | NO         |
| <i>Reporting</i>                       |                                                                                                                                 |            |
| 29. Quotations presented               | Were participant quotations presented to illustrate the themes/findings? Was each quotation identified? e.g. participant number | Results    |
| 30. Data and findings consistent       | Was there consistency between the data presented and the findings?                                                              | Page 13    |
| 31. Clarity of major themes            | Were major themes clearly presented in the findings?                                                                            | RESULTS    |
| 32. Clarity of minor themes            | Is there a description of diverse cases or discussion of minor themes?                                                          | Discussion |

**Once you have completed this checklist, please save a copy and upload it as part of your submission. When requested to do so as part of the upload process, please select the file type: *Checklist*. You will NOT be able to proceed with**

1  
2  
3 **submission unless the checklist has been uploaded. Please DO NOT include this**  
4 **checklist as part of the main manuscript document. It must be uploaded as a**  
5 **separate file.**  
6  
7  
8  
9  
10  
11  
12  
13  
14  
15  
16  
17  
18  
19  
20  
21  
22  
23  
24  
25  
26  
27  
28  
29  
30  
31  
32  
33  
34  
35  
36  
37  
38  
39  
40  
41  
42  
43  
44  
45  
46  
47  
48  
49  
50  
51  
52  
53  
54  
55  
56  
57  
58  
59  
60

For peer review only
